# Supplementary material for: LC-MS screening of poly- and perfluoroalkyl substances in contaminated soil by Kendrick mass analysis
Source: Anal Bioanal Chem. 2020 Jan 9;412(20):4797–805. doi: 10.1007/s00216-019-02358-0 (PMC7334281; doi:10.1007/s00216-019-02358-0)
Supplement: Supplementary file 1 — (PDF 1766 kb) [file 216_2019_2358_MOESM1_ESM.pdf]

**Analytical and Bioanalytical Chemistry**

**Electronic Supplementary Material**

**LC-MS screening of poly- and perfluoroalkyl substances in contaminated soil by Kendrick mass analysis**

Boris Bugsel, Christian Zwiener

Additional files available under [10.1007/s00216-019-02358-0](https://doi.org/10.1007/s00216-019-02358-0)

## Contents

|                                                                                            |    |
|--------------------------------------------------------------------------------------------|----|
| Abbreviations and Acronyms .....                                                           | 3  |
| Examples for structures of compounds from different PFAS classes.....                      | 4  |
| Example for manual verification of homologues .....                                        | 6  |
| Sample 1: Confirmation of the identification with an authentic standard.....               | 7  |
| Sample 2: Confirmation of the identification with an authentic standard.....               | 22 |
| Sample 3: Confirmation of the identification with an authentic standard.....               | 29 |
| Sample 4 Confirmation of the identification with an authentic standard.....                | 37 |
| Targeted MS/MS measurements .....                                                          | 48 |
| Confirmation of the identification with an authentic standard for samples 2, 3, and 4..... | 52 |

## Abbreviations and Acronyms

|                    |                                                                     |
|--------------------|---------------------------------------------------------------------|
| AIF                | All-ion fragmentation                                               |
| Da                 | Dalton                                                              |
| diPAP              | Polyfluorinated dialkylated phosphate ester                         |
| diSAmPAP           | N-ethyl perfluorooctane sulfonamide ethanol-based phosphate diester |
| EIC                | Extracted Ion Chromatogram                                          |
| ESI                | Electrospray Ionization                                             |
| EtFASA             | N-ethyl perfluoroalkanesulfonamide                                  |
| EtFASAA            | N-ethylperfluoro-1-alkanesulfonamidoacetic acid                     |
| EtFOSAA            | N-ethylperfluoro-1-octanesulfonamidoacetic acid                     |
| FASA               | Perfluoroalkanesulfonamide                                          |
| FOSA               | Perfluorooctanesulfonamide                                          |
| FTOH               | Fluorotelomer alcohol                                               |
| FTSA               | Fluorotelomer sulfonic acid                                         |
| FTUCA              | Fluorotelomer unsaturated carboxylic acid                           |
| GenX               | Ammonium 2,3,3,3-tetrafluoro-2-(heptafluoropropoxy)-propanoate      |
| HRMS               | High resolution mass spectrometry                                   |
| HS                 | Homologous series                                                   |
| KM                 | Kendrick mass                                                       |
| KMD                | Kendrick mass defect                                                |
| LC                 | Liquid Chromatography                                               |
| LTZ                | Landwirtschaftliches Technologiezentrum Augustenberg                |
| MeFASA             | N-methyl perfluoroalkanesulfonamide                                 |
| MeOH               | Methanol                                                            |
| MFE                | Molecular feature extraction                                        |
| NH <sub>4</sub> Ac | Ammonium acetate                                                    |
| OM                 | Observed Mass                                                       |
| PFAAs              | Perfluoroalkyl acids                                                |
| PFASs              | Poly- and perfluorinated alkylated substances                       |
| PFCAs              | Perfluorocarboxylic acids                                           |
| PFHpA              | Perfluoroheptanoic acid                                             |
| PFNA               | Perfluorononanoic acid                                              |
| PFOA               | Perfluorooctanoic acid                                              |
| PFOS               | Perfluorooctanesulfonic acid                                        |
| PFPIA              | Perfluorinated phosphinic acid                                      |
| PFSAs              | Perfluorosulfonic acids                                             |
| PP                 | Polypropylene                                                       |
| rcf                | Relative centrifugal force                                          |
| RT                 | Retention time                                                      |
| TP                 | Transformation product                                              |
| triPAP             | Polyfluorinated trialkylated phosphate ester                        |

## Examples for structures of compounds from different PFAS classes

This table contains examples for structures of identified PFAS classes. Further PFAS homologues can be formed by variation of the number of CF<sub>2</sub> units.

|                                                                                                       |                                                                                                       |                                                                                                         |                                                                                                         |
|-------------------------------------------------------------------------------------------------------|-------------------------------------------------------------------------------------------------------|---------------------------------------------------------------------------------------------------------|---------------------------------------------------------------------------------------------------------|
| <b>PFSA</b> s<br>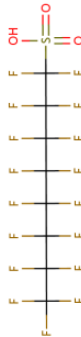    | <b>PFPIA</b> s<br>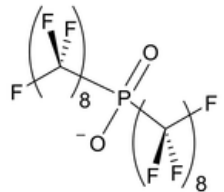   | <b>FTUCA</b> s<br>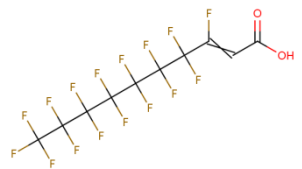    | <b>FASA</b> s<br>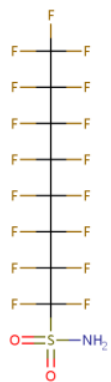    |
| <b>diPAP</b> s<br>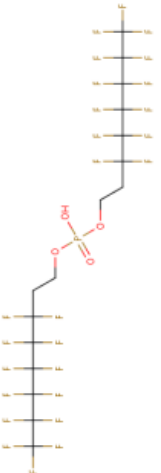  | <b>EtFASAAs</b><br>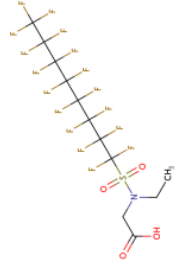 | <b>n:3 PFCAs</b><br>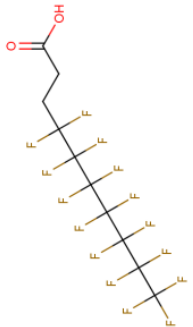  | <b>PFCAs</b><br>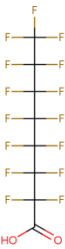    |
| <b>MeFASAs</b><br>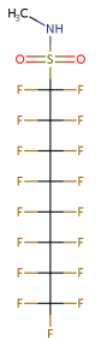 | <b>FTSAs</b><br>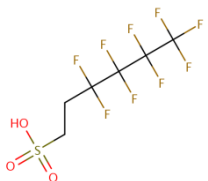   | <b>diSAmPAPs</b><br>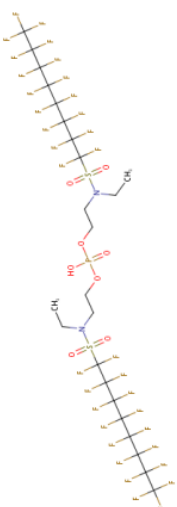 | <b>EtFASAs</b><br>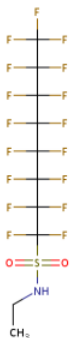 |

## Confirmation of the identification

The instrumental parameters used for acquisition of the chromatograms were generally the same as described in the methods section of the paper. But for soil samples a 1:10 dilution was injected (5  $\mu$ L) and the LC gradient was slightly changed and started at 25% B with a linear increase to 85% B at 4 min and to 100% B at 5 min, isocratic for another 15 min.

All extracted ion chromatograms in this document were extracted with a 10 ppm mass window with the exception of the targeted MS/MS data. The top chromatogram shows the reference standard (each at 5  $\mu$ g/L corresponding to 10  $\mu$ g/kg soil), the bottom chromatogram the soil sample (1:10 dilution) in each case.

## Example for manual verification of homologues

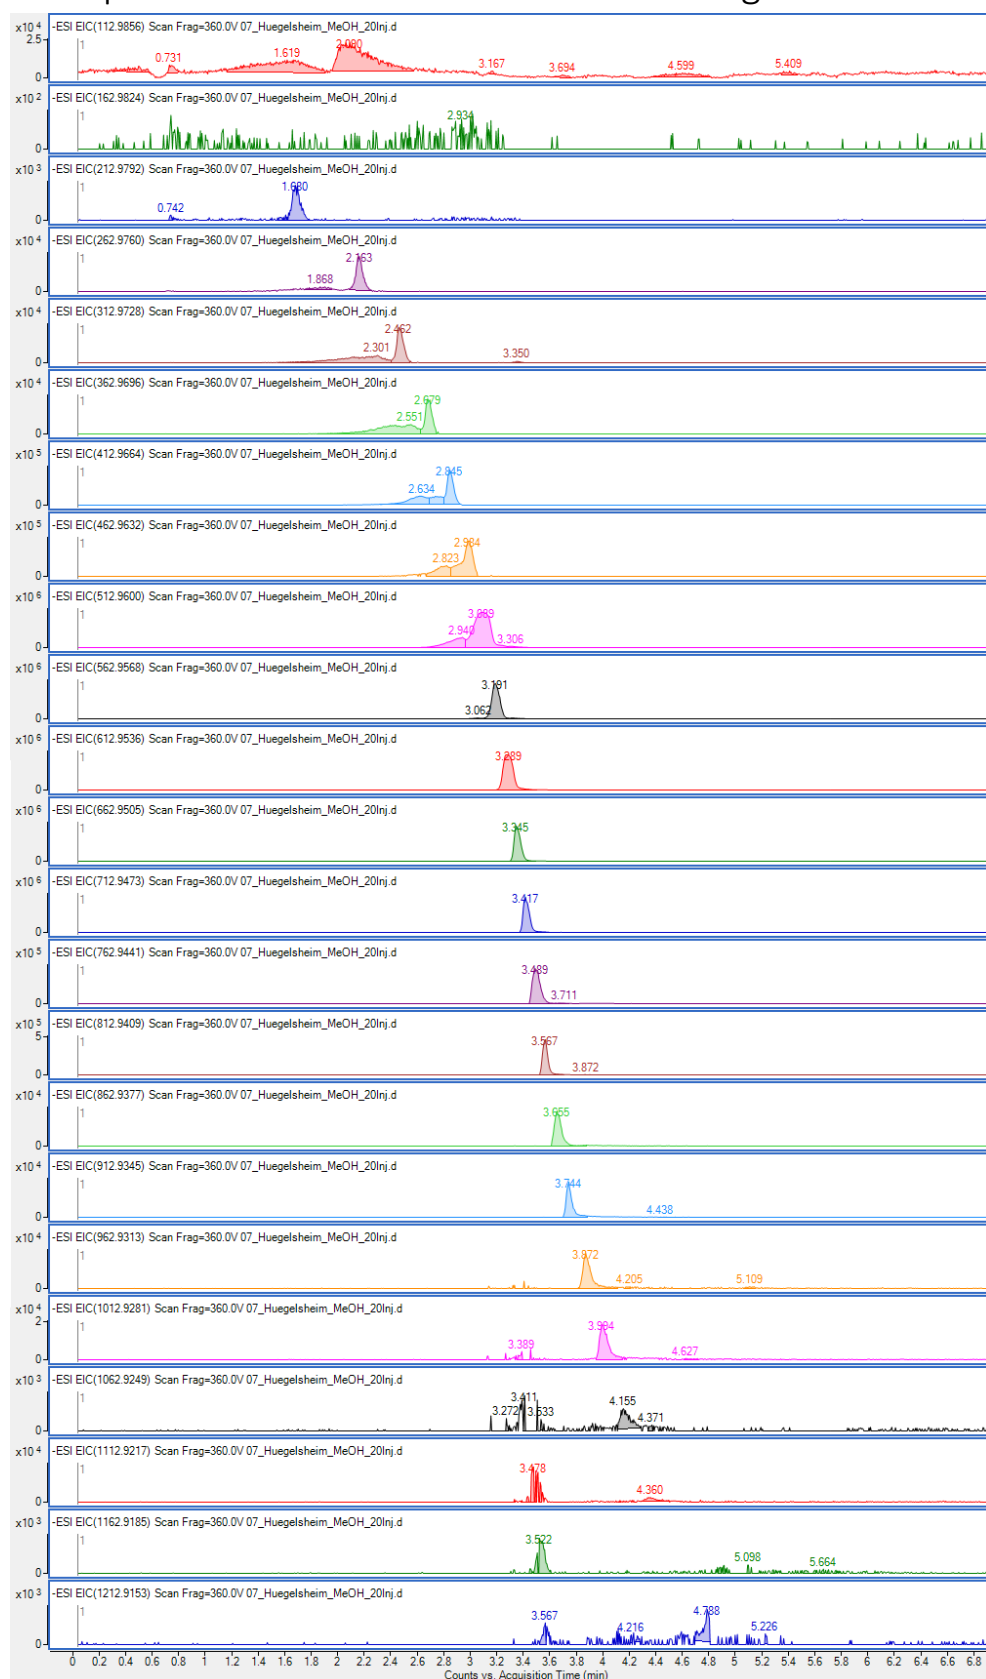

**Fig. S1** EICs of all theoretical homologues of the PFCA substance class ( $m/z$  113 - 1213) based on accurate mass and systematic retention time shift

Sample 1: Confirmation of the identification with an authentic standard

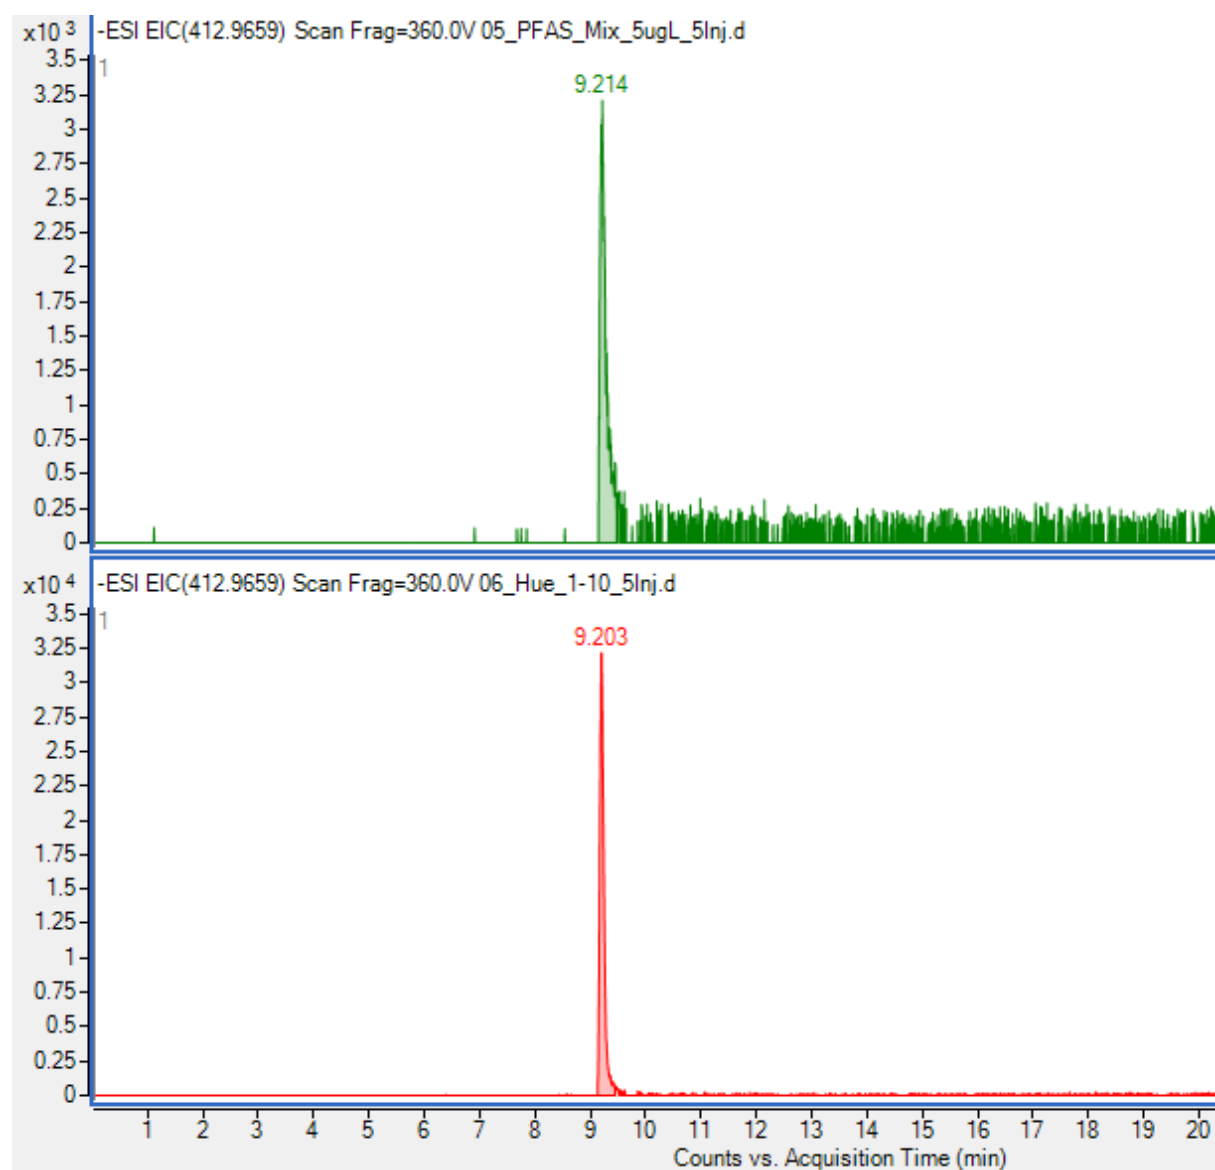

**Fig. S1.1** Top: EIC of PFOA standard 5 µg/L, bottom: 1/10 dilution of sample 1

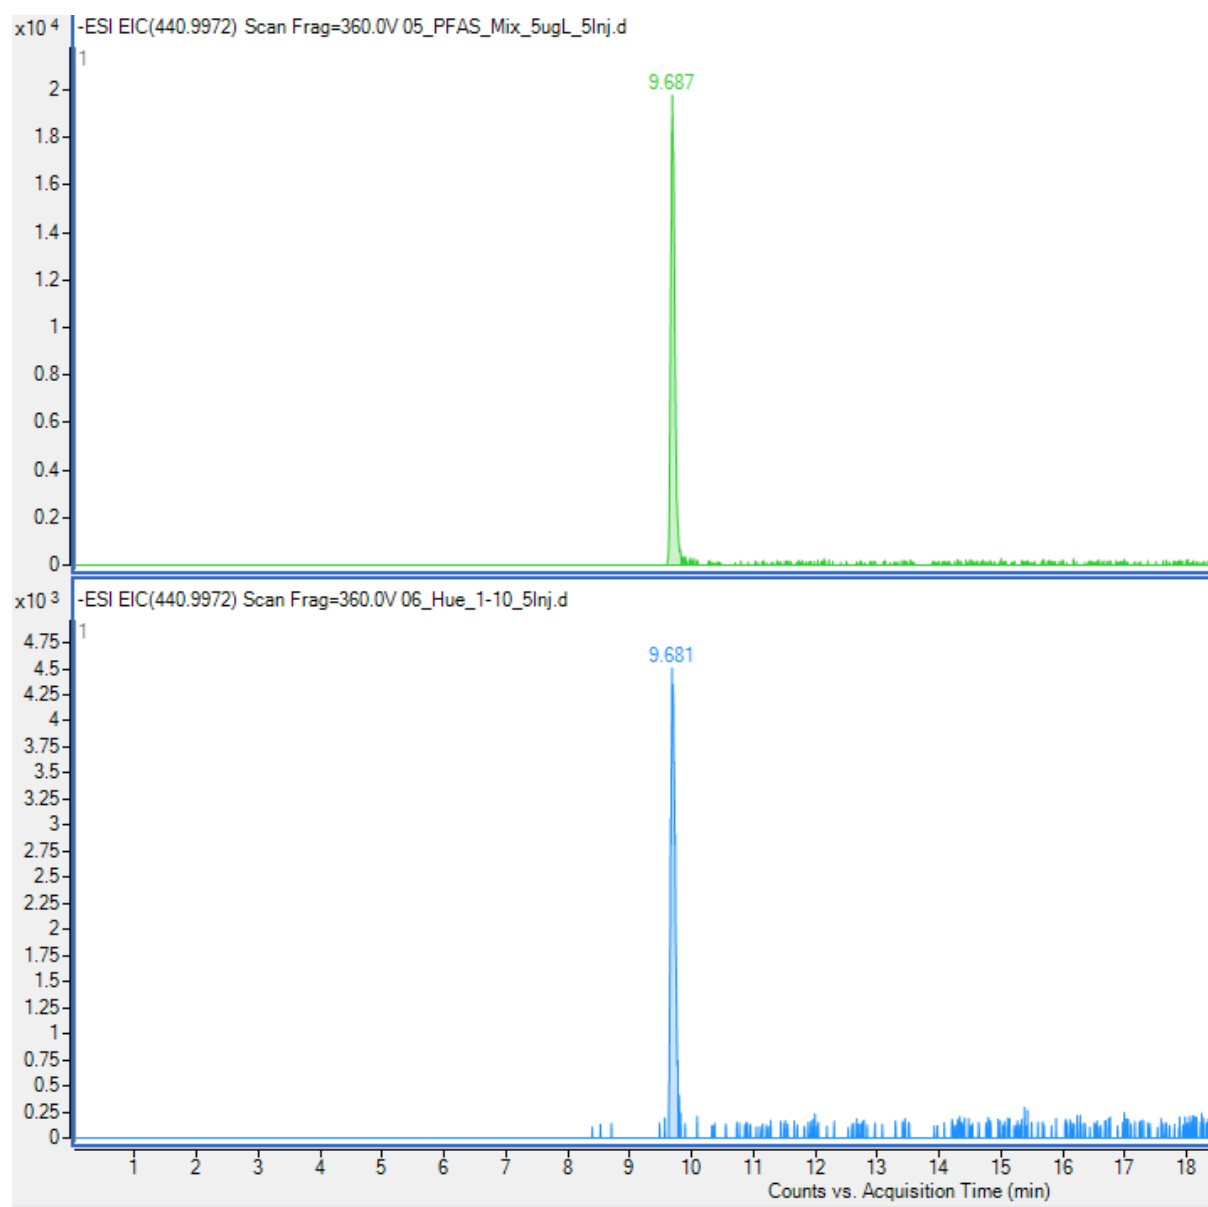

**Fig. S1.2** Top: EIC of 7:3 PFCA standard 5  $\mu\text{g/L}$ , bottom: 1/10 dilution of sample 1

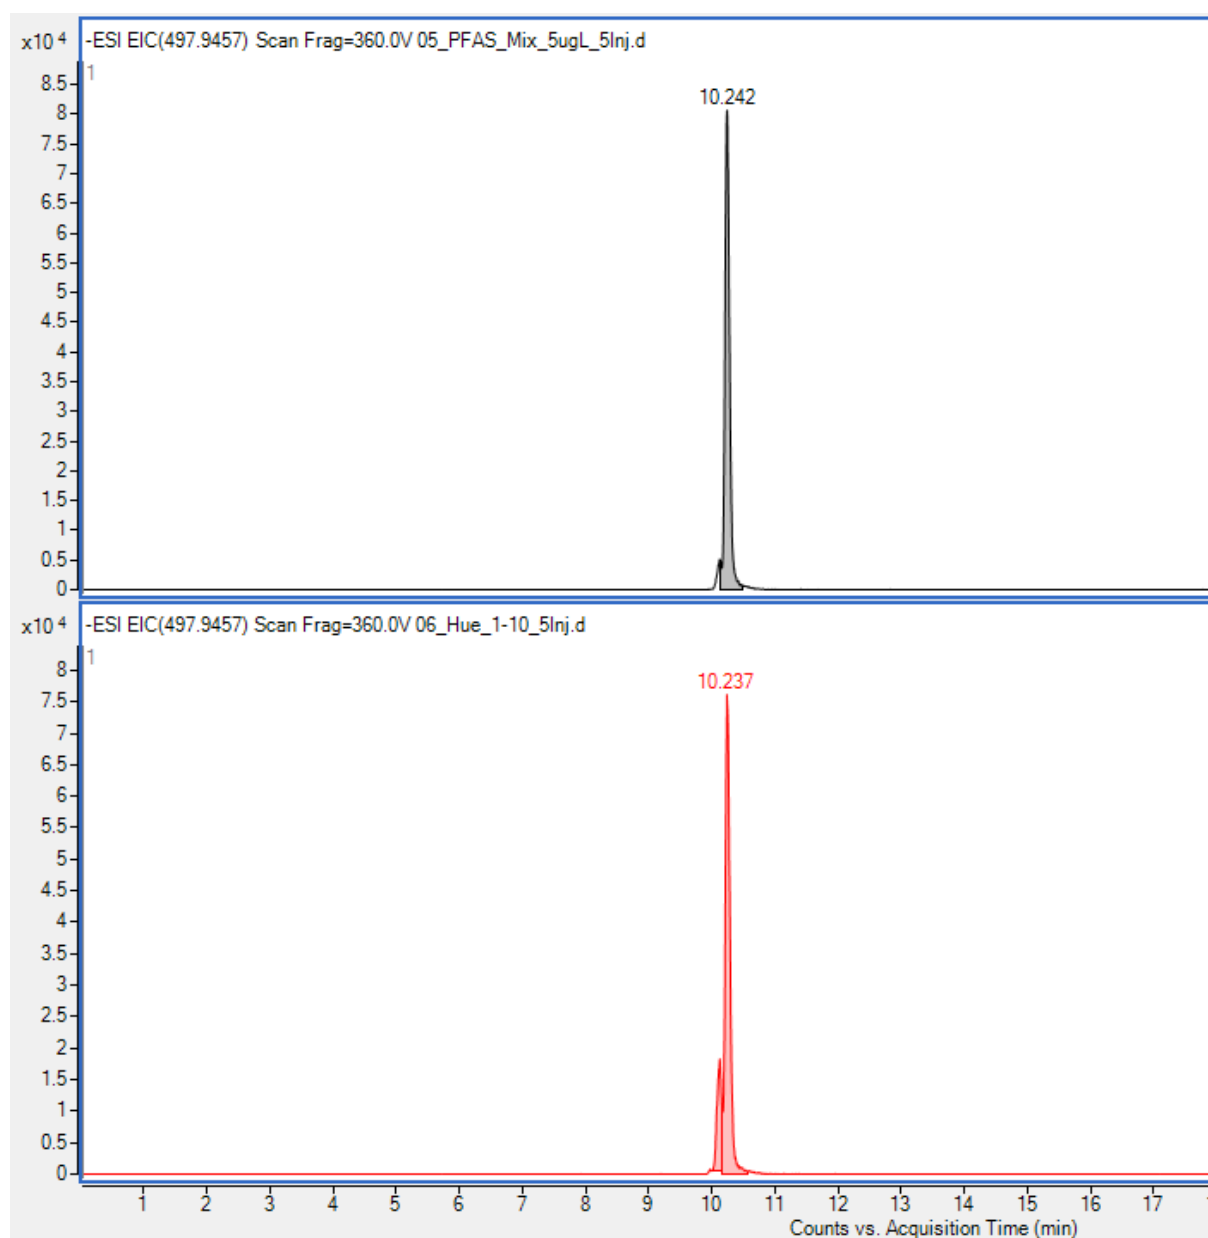

**Fig. S1.3** Top: EIC of FOSA standard 5  $\mu\text{g/L}$ , bottom: 1/10 dilution of sample 1

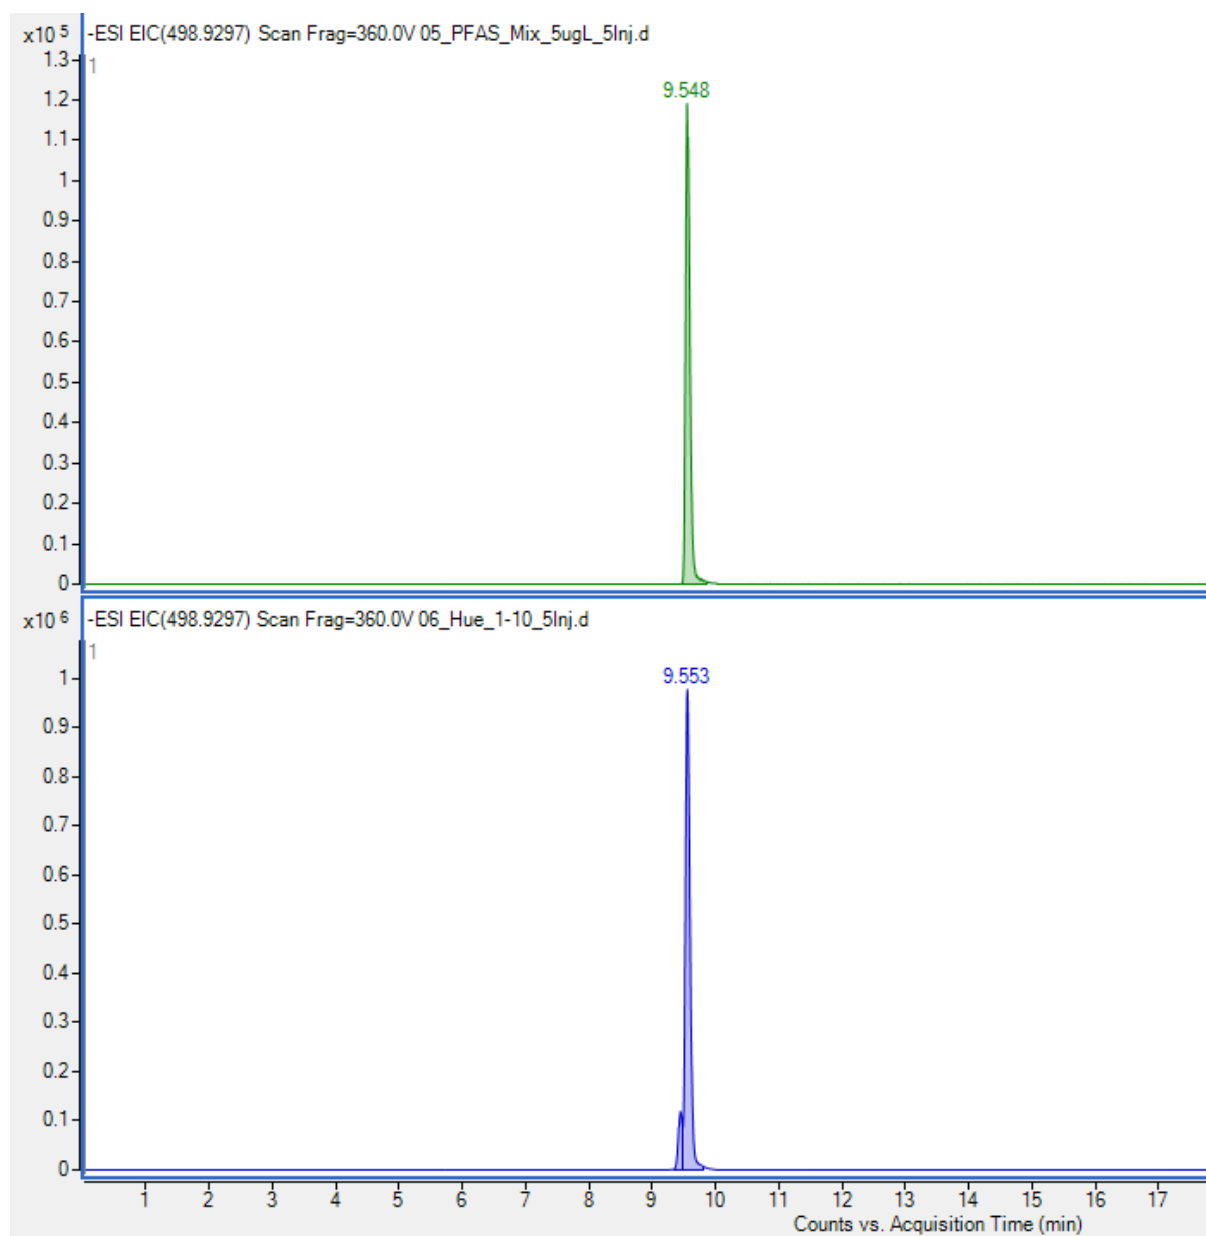

**Fig. S1.4** Top: EIC of PFOS standard 5  $\mu\text{g/L}$ , bottom: 1/10 dilution of sample 1

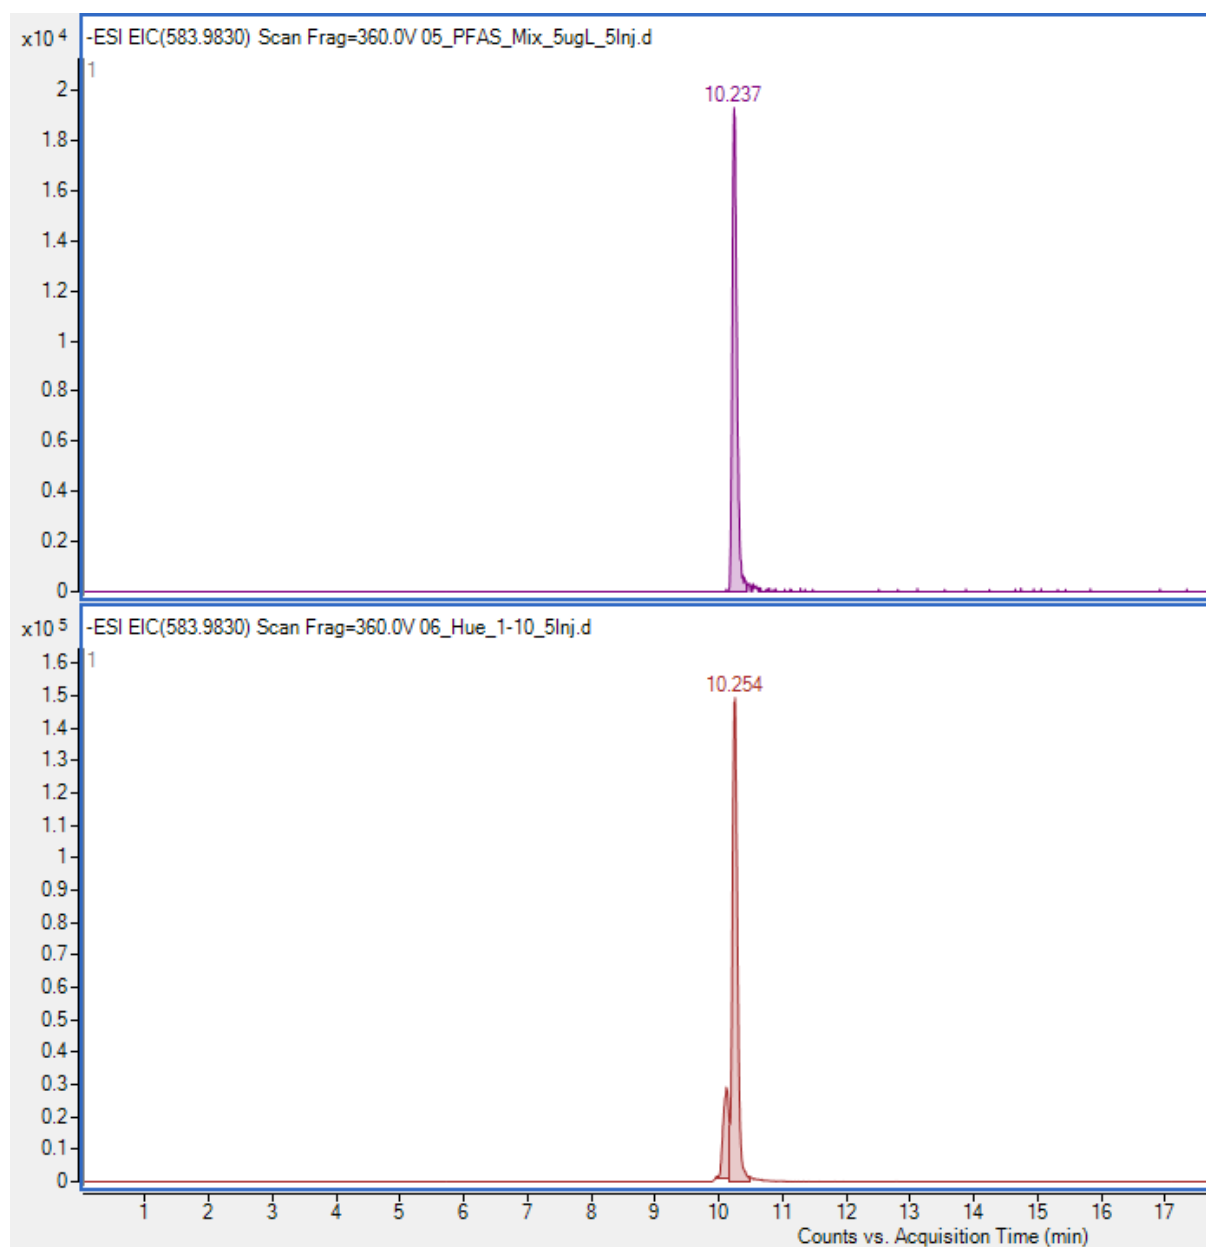

**Fig. S1.5** Top: EIC of EtFOSAA standard 5  $\mu\text{g/L}$ , bottom: 1/10 dilution of sample 1

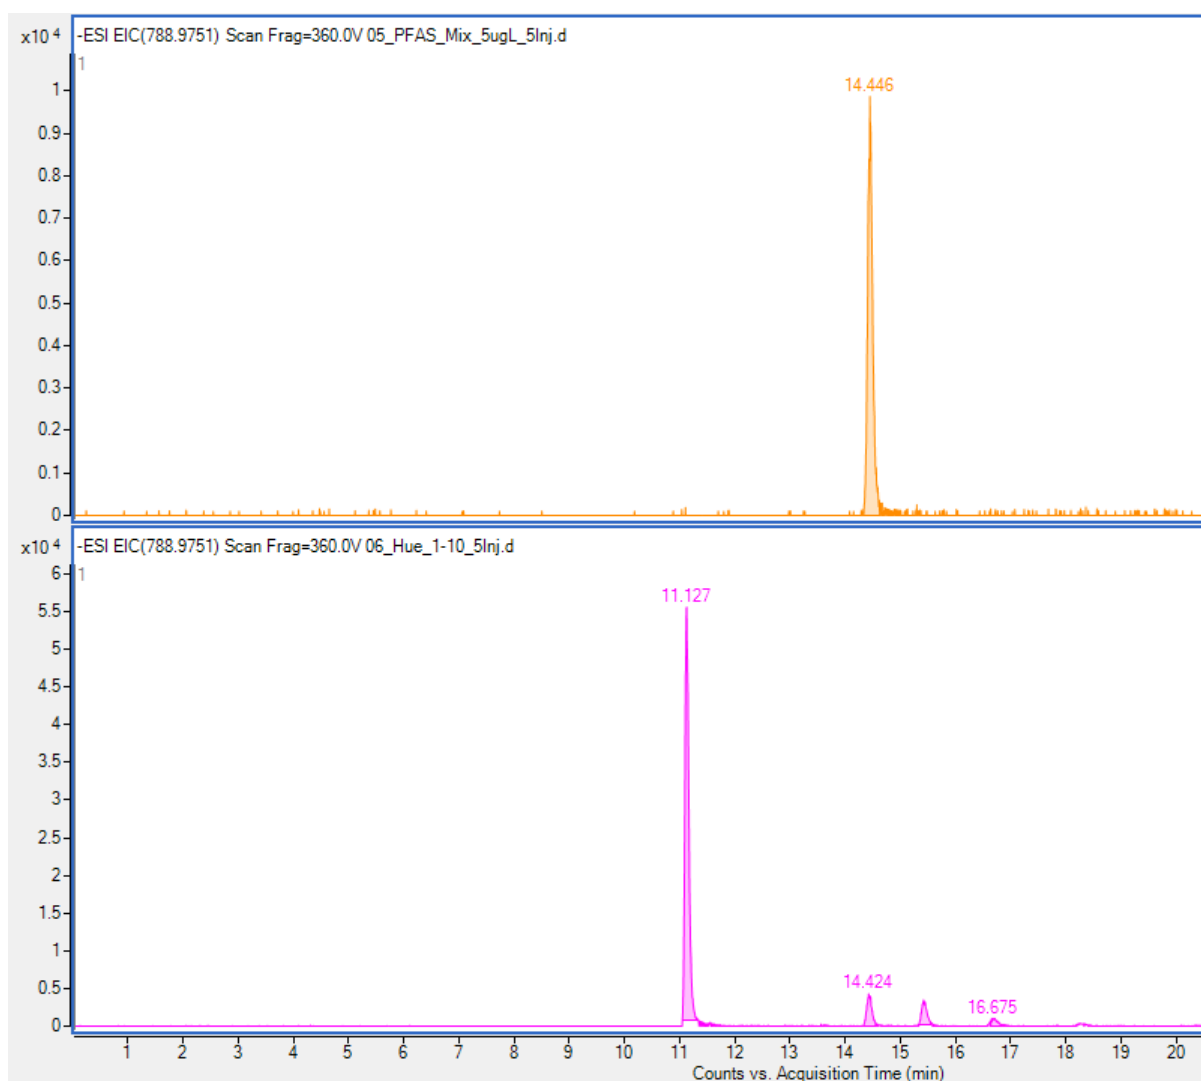

**Fig. S1.6** Top: 6:2 / 6:2 / 6:2 triPAP standard 5  $\mu\text{g/L}$ , bottom: 1/10 dilution of sample 1. The diPAP peak and further triPAP peaks in sample 1 are visible

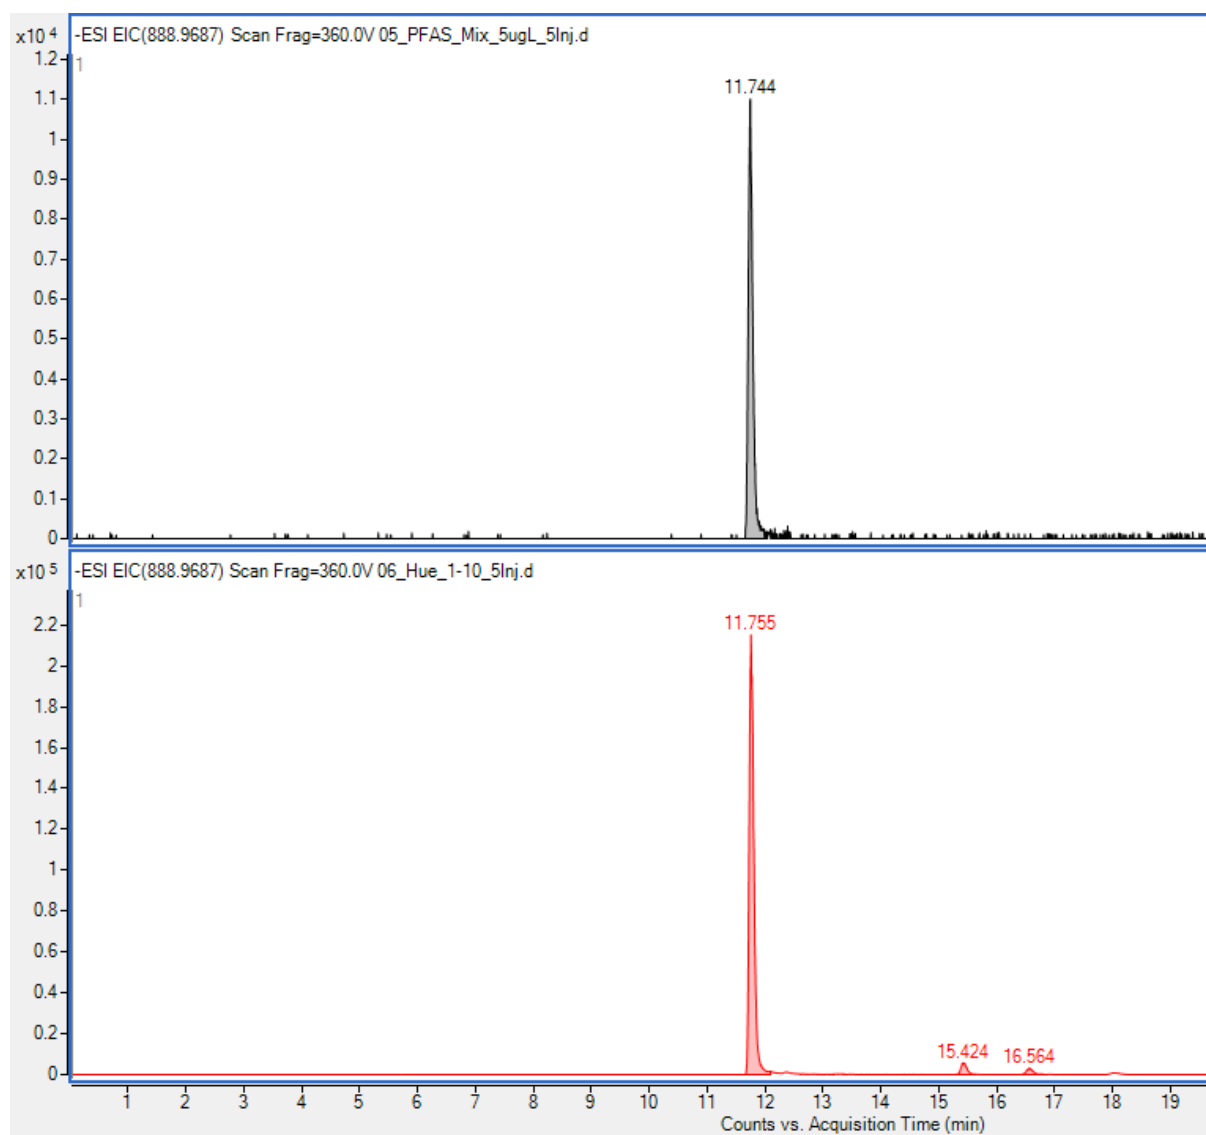

**Fig. S1.7** Top: EIC of 6:2 / 8:2 diPAP standard 5  $\mu\text{g/L}$ , bottom: 1/10 dilution of sample 1. TriPAP peaks are visible in sample 1

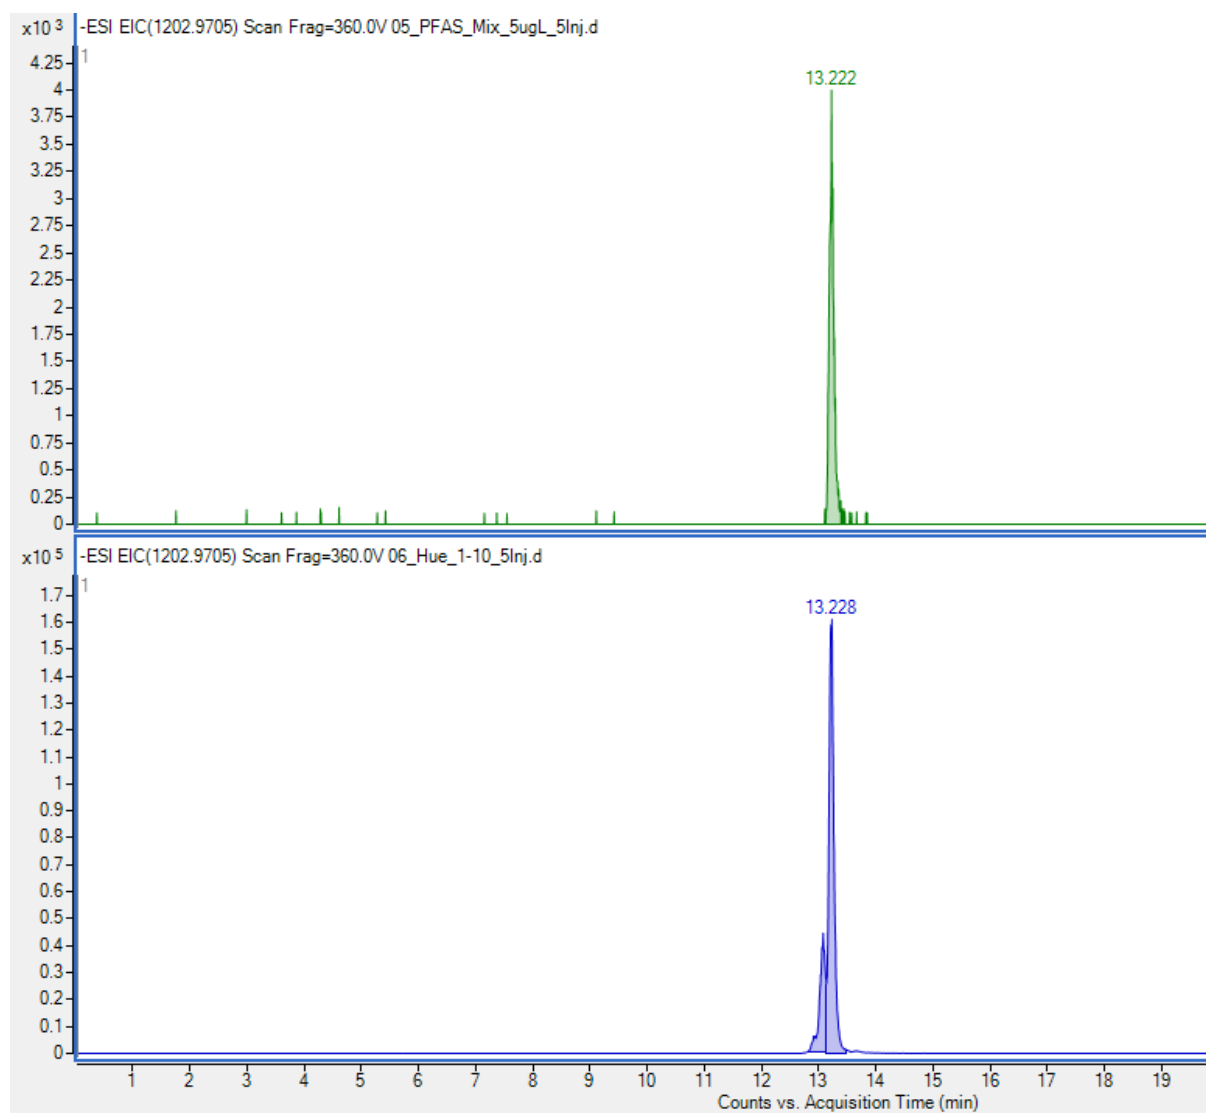

**Fig. S1.8** Top: EIC of diSAmPAP standard 5  $\mu\text{g/L}$ , bottom: 1/10 dilution of sample 1

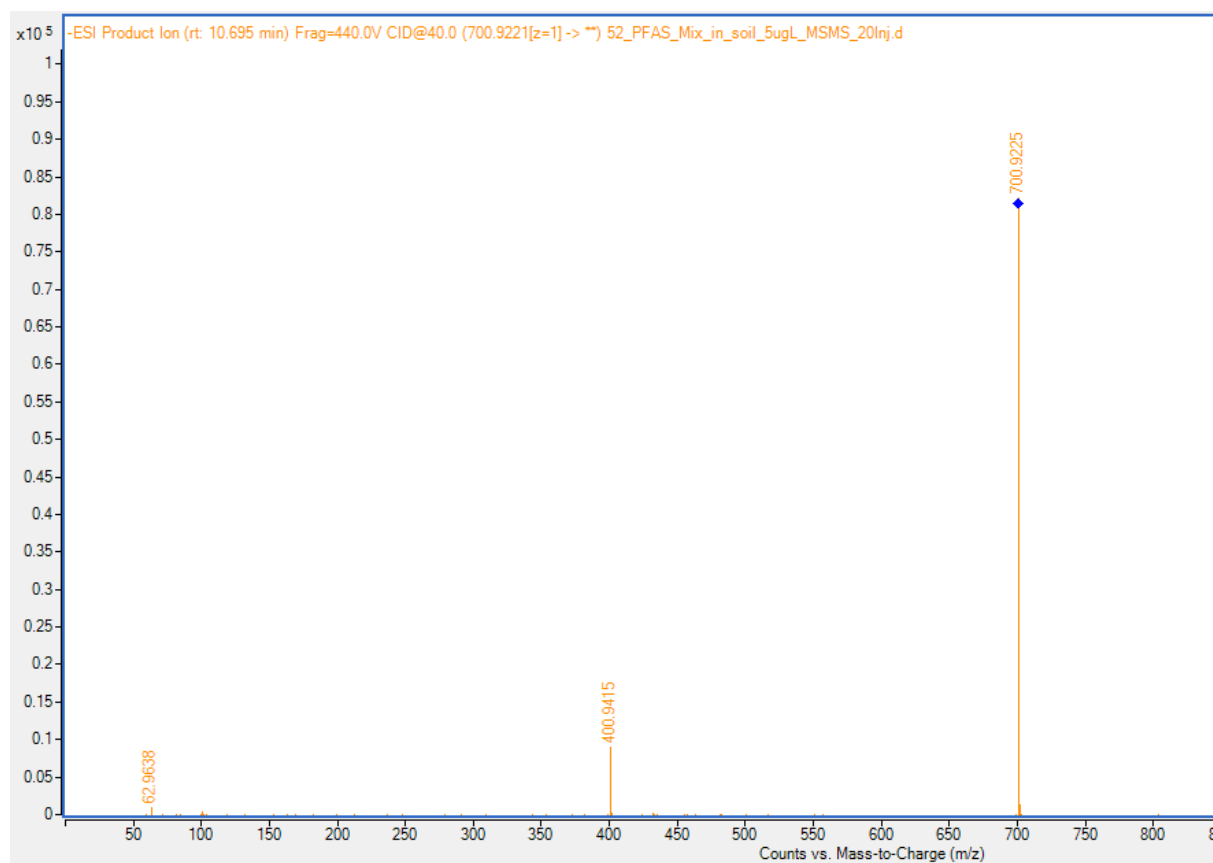

**Fig. S1.9** Recorded MS/MS spectrum of C6 PFPIA standard 5 µg/L @ 40eV

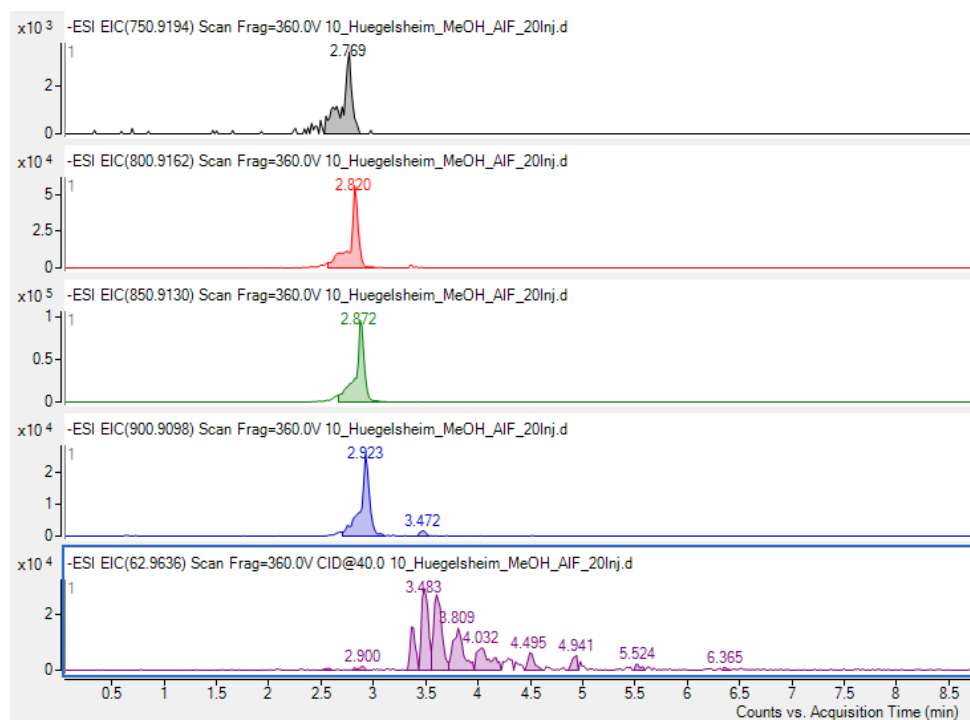

**Fig. S1.10** Chromatogram of PFPIA masses and the fragment  $m/z$  62.9638 @40 eV (AIF measurement). Chromatograms of  $m/z$  750.9194 (black), 800.9162 (red), 850.9130 (green), 900.9098 (blue) (these values fit the PFPIA substance class) and the fragment  $m/z$  62.9638 @40 eV (purple). No coelution can be observed

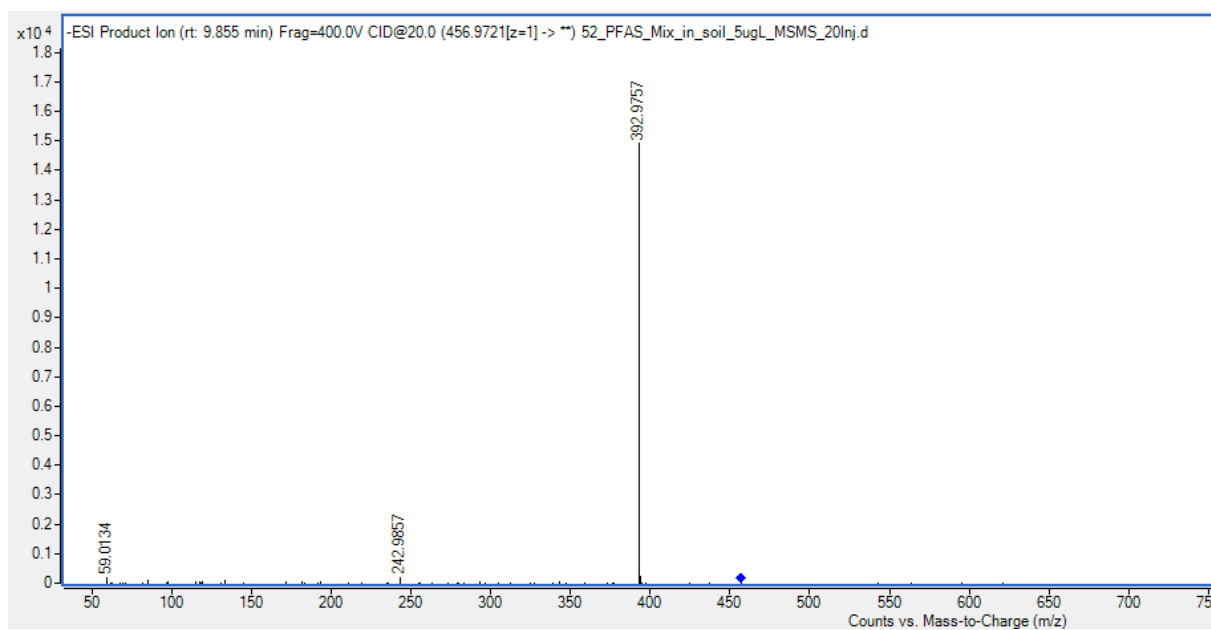

**Fig. S1.11** MSMS of 8:2 FTUCA standard 5  $\mu\text{g/L}$  @ 20ev

Dominant peak at 392.9757: Corresponding to loss of  $\text{CO}_2\text{HF}$

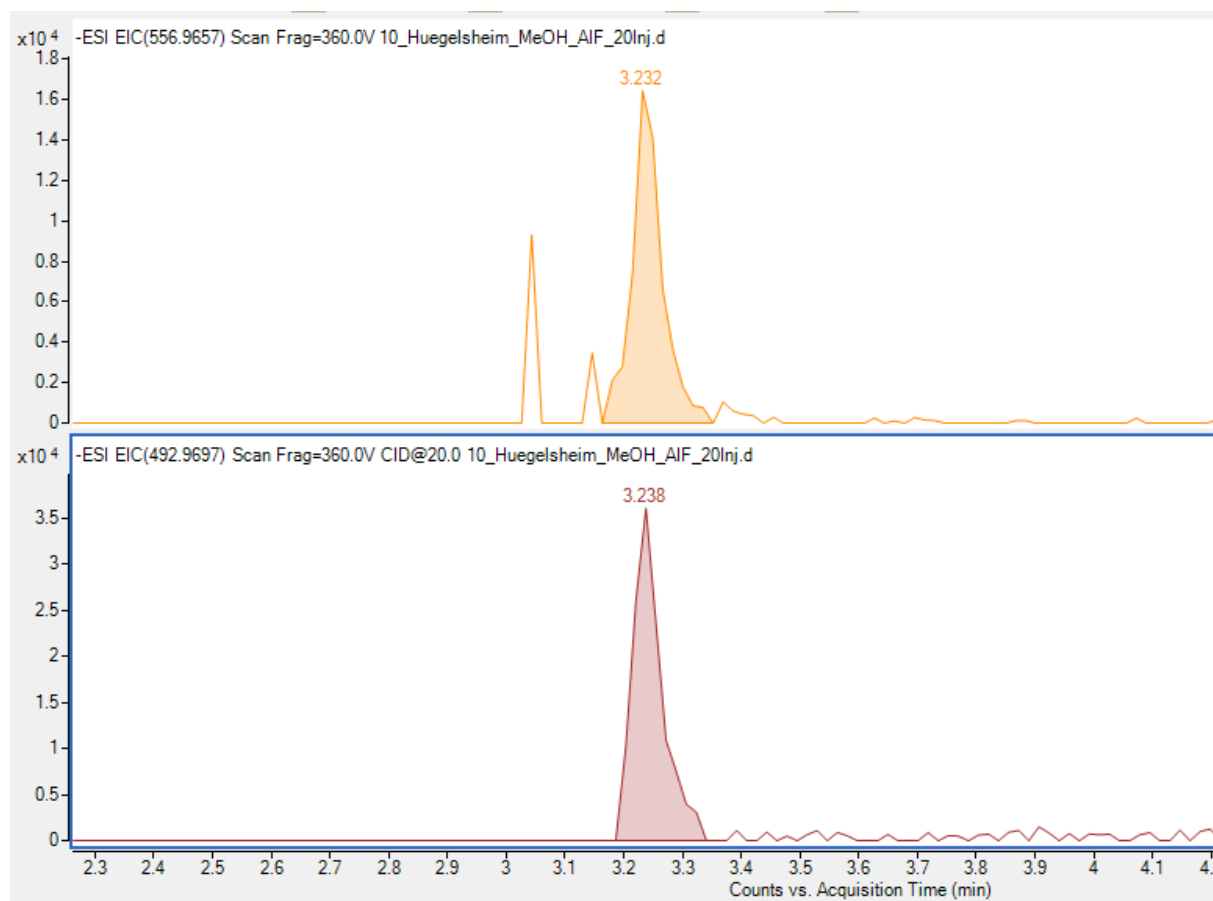

**Fig. S1.12** Top: EIC of 556.9657 (m/z of 10:2 FTUCA, 0 eV); bottom: EIC of 492.9697 (m/z of 10:2 FTUCA minus CO<sub>2</sub>HF, 20 eV)

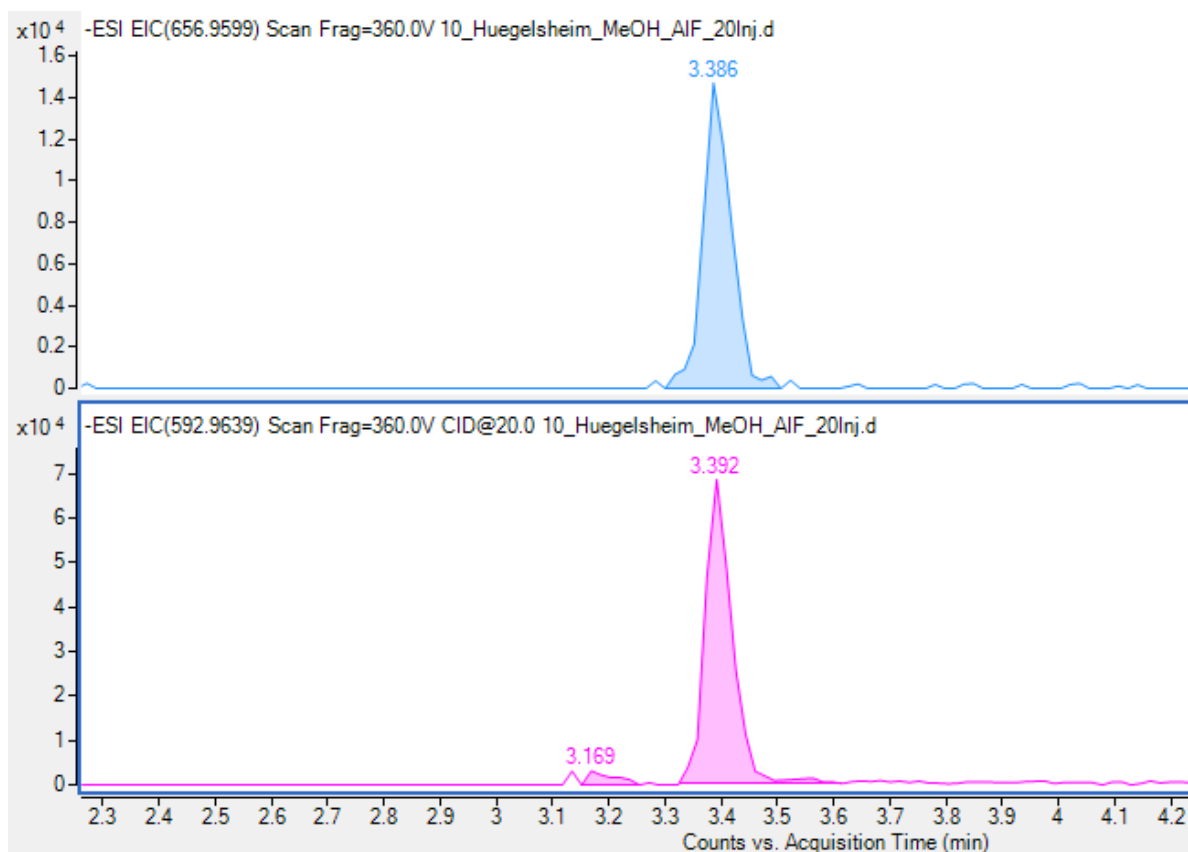

**Fig. S1.13** Top: EIC of 656.9599 (m/z of 12:2 FTUCA, 0 eV); bottom: EIC of 592.9639 (m/z of 12:2 FTUCA minus CO<sub>2</sub>HF, 20 eV)

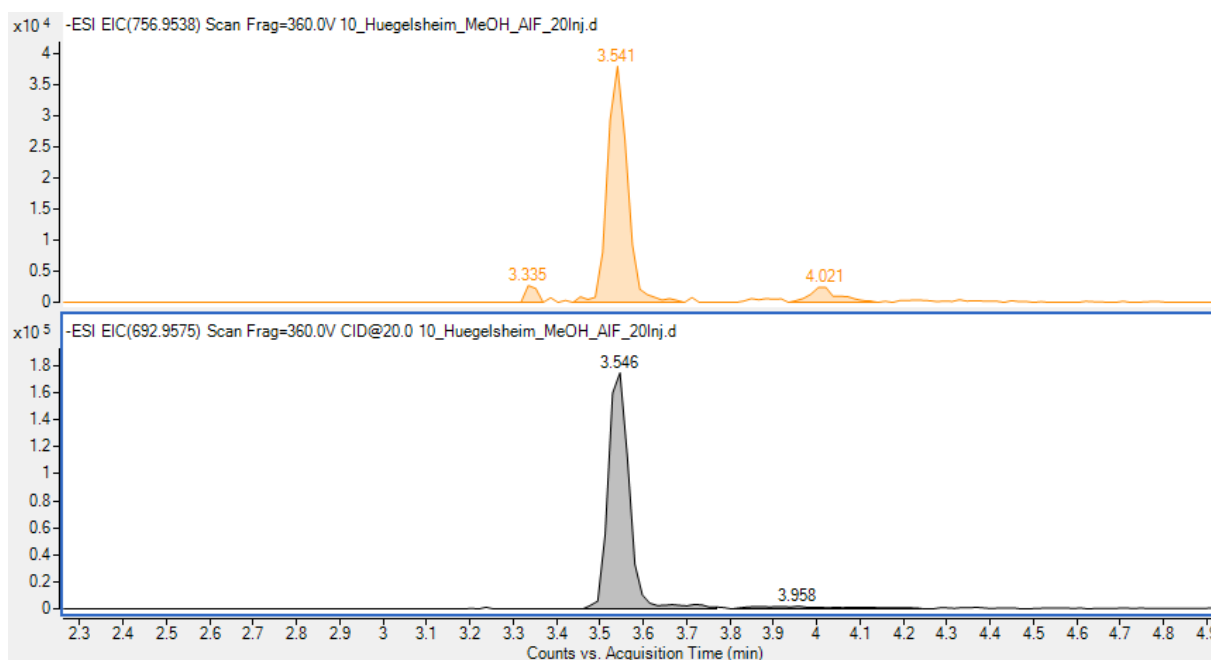

**Fig. S1.14** Top: EIC of 756.9538 (m/z of 14:2 FTUCA, 0eV); bottom: EIC of 592.9639 (m/z of 14:2 FTUCA minus CO<sub>2</sub>HF, 20 eV)

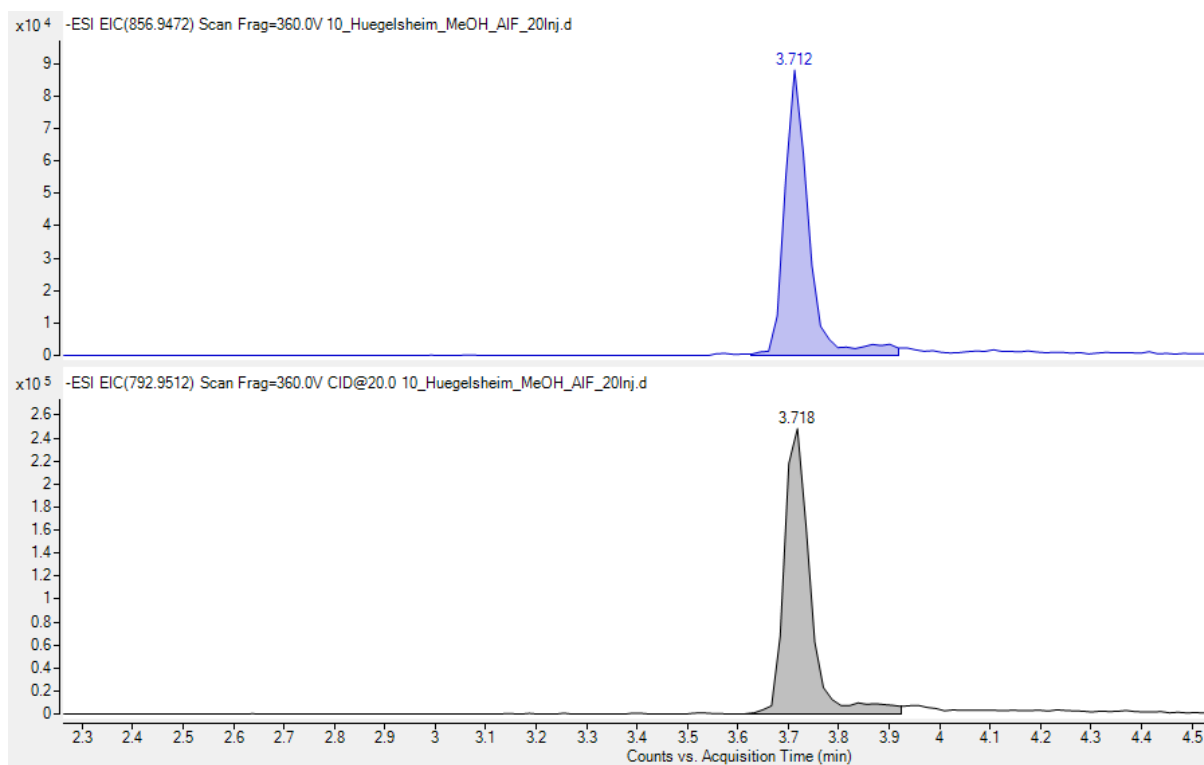

**Fig. S1.15** Top: EIC of 856.9472 ( $m/z$  of 16:2 FTUCA, 0eV); bottom: EIC of 792.9512 ( $m/z$  of 16:2 FTUCA minus CO<sub>2</sub>HF, 20 eV)

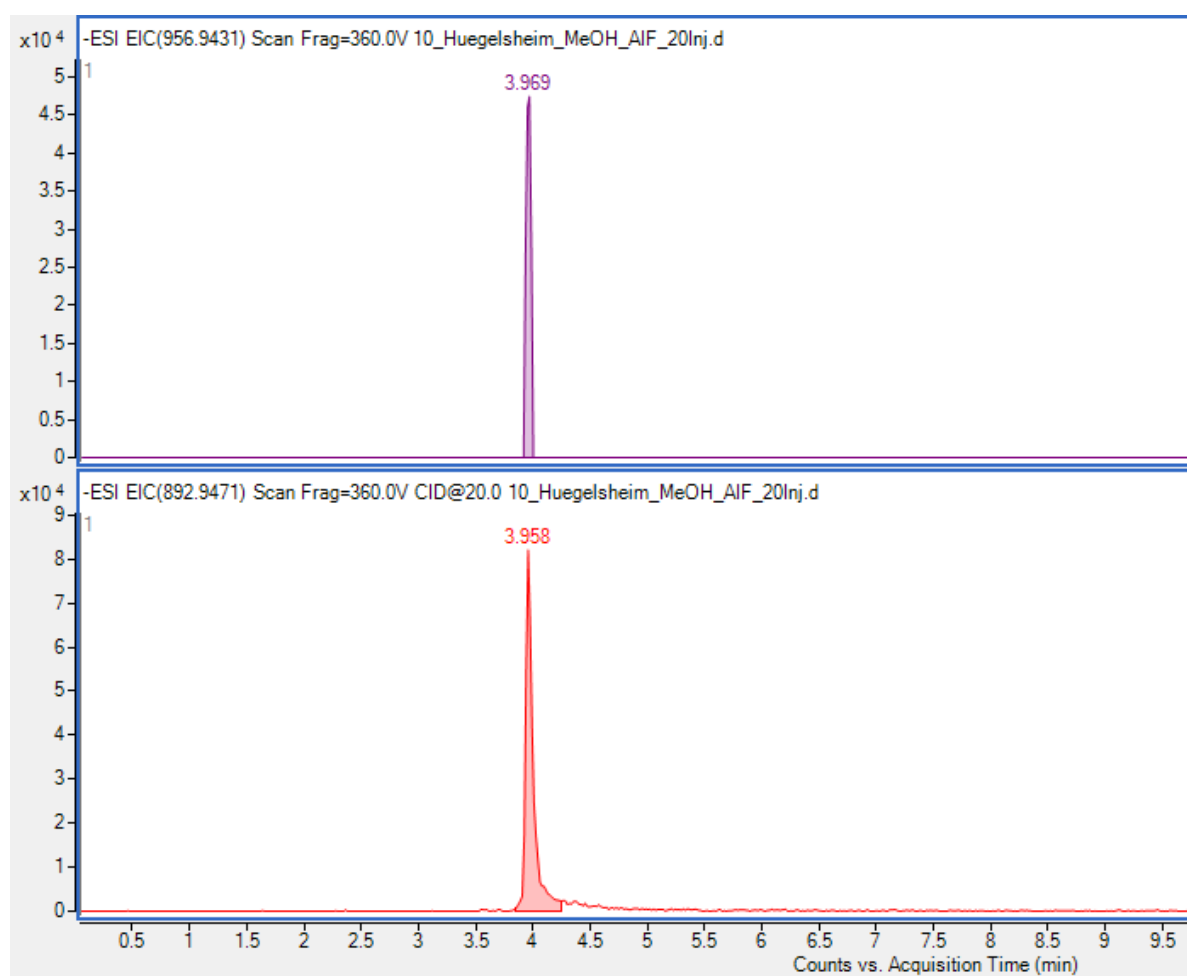

**Fig. S1.16** Top: EIC of 956.9431 ( $m/z$  of 18:2 FTUCA, 0eV); bottom: EIC of 892.9471 ( $m/z$  of 18:2 FTUCA minus CO<sub>2</sub>HF, 20 eV)

## Sample 2: Confirmation of the identification with an authentic standard

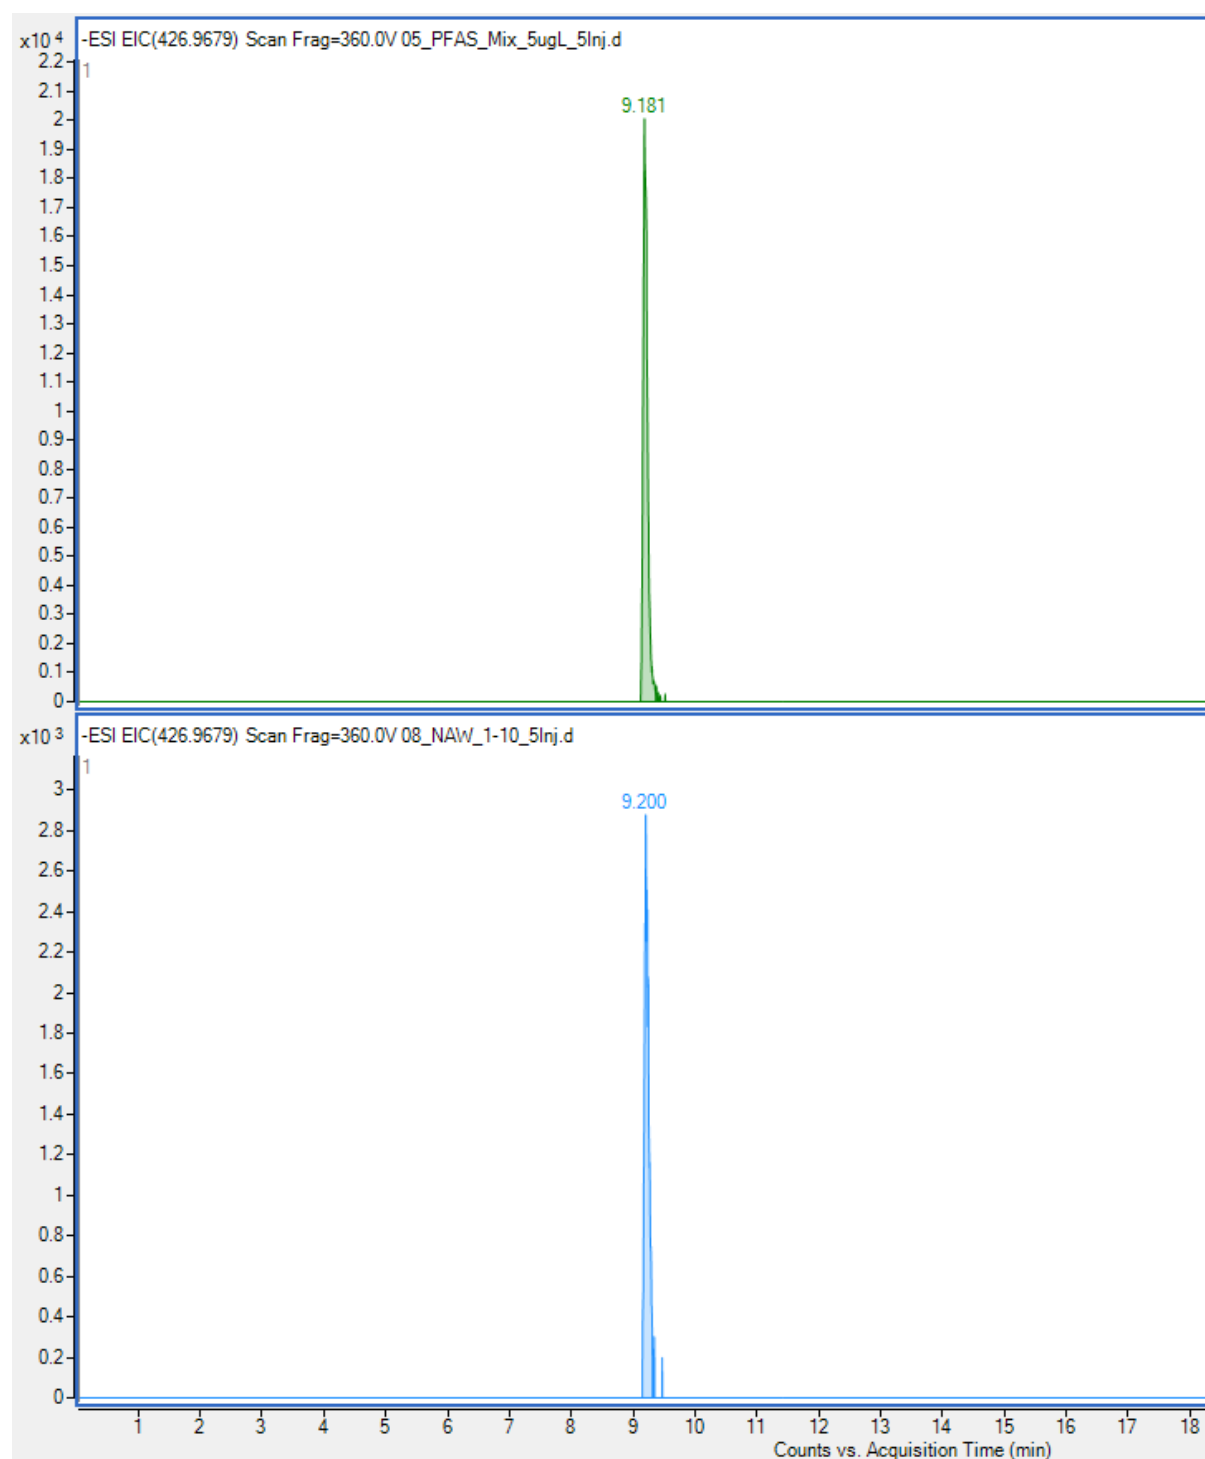

**Fig. S1.17** Top: EIC of 6:2 FTS standard 5 µg/L, bottom: 1/10 dilution of sample 2

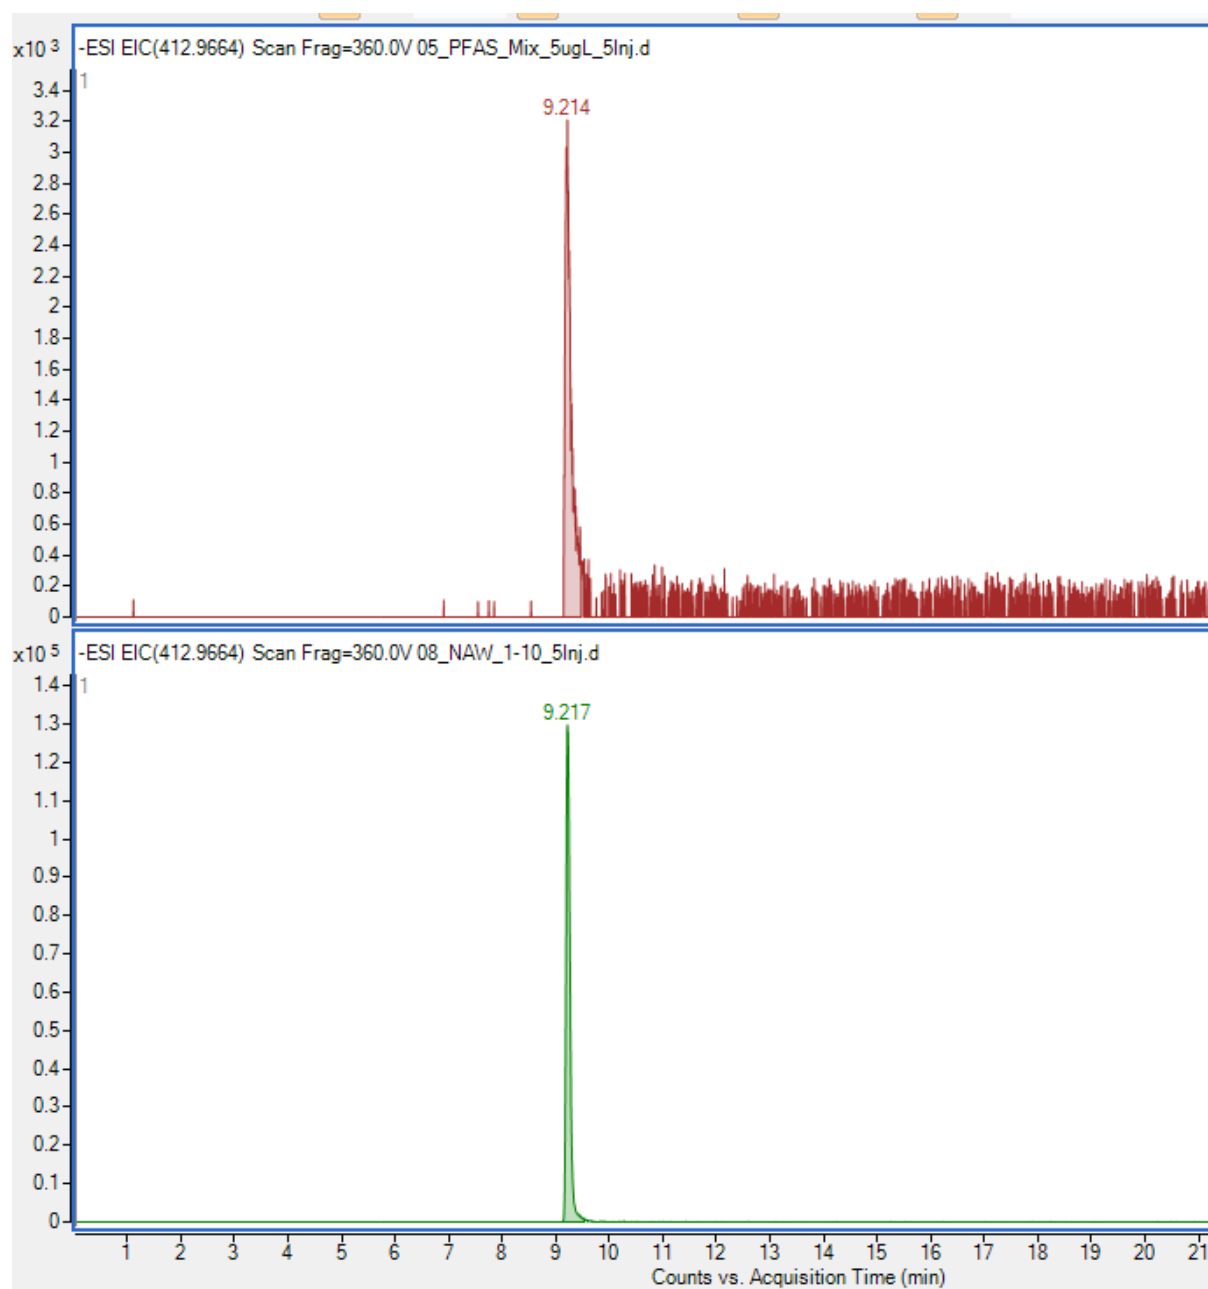

**Fig. S1.18** Top: EIC of PFOA standard 5  $\mu\text{g/L}$ , bottom: 1/10 dilution of sample 2

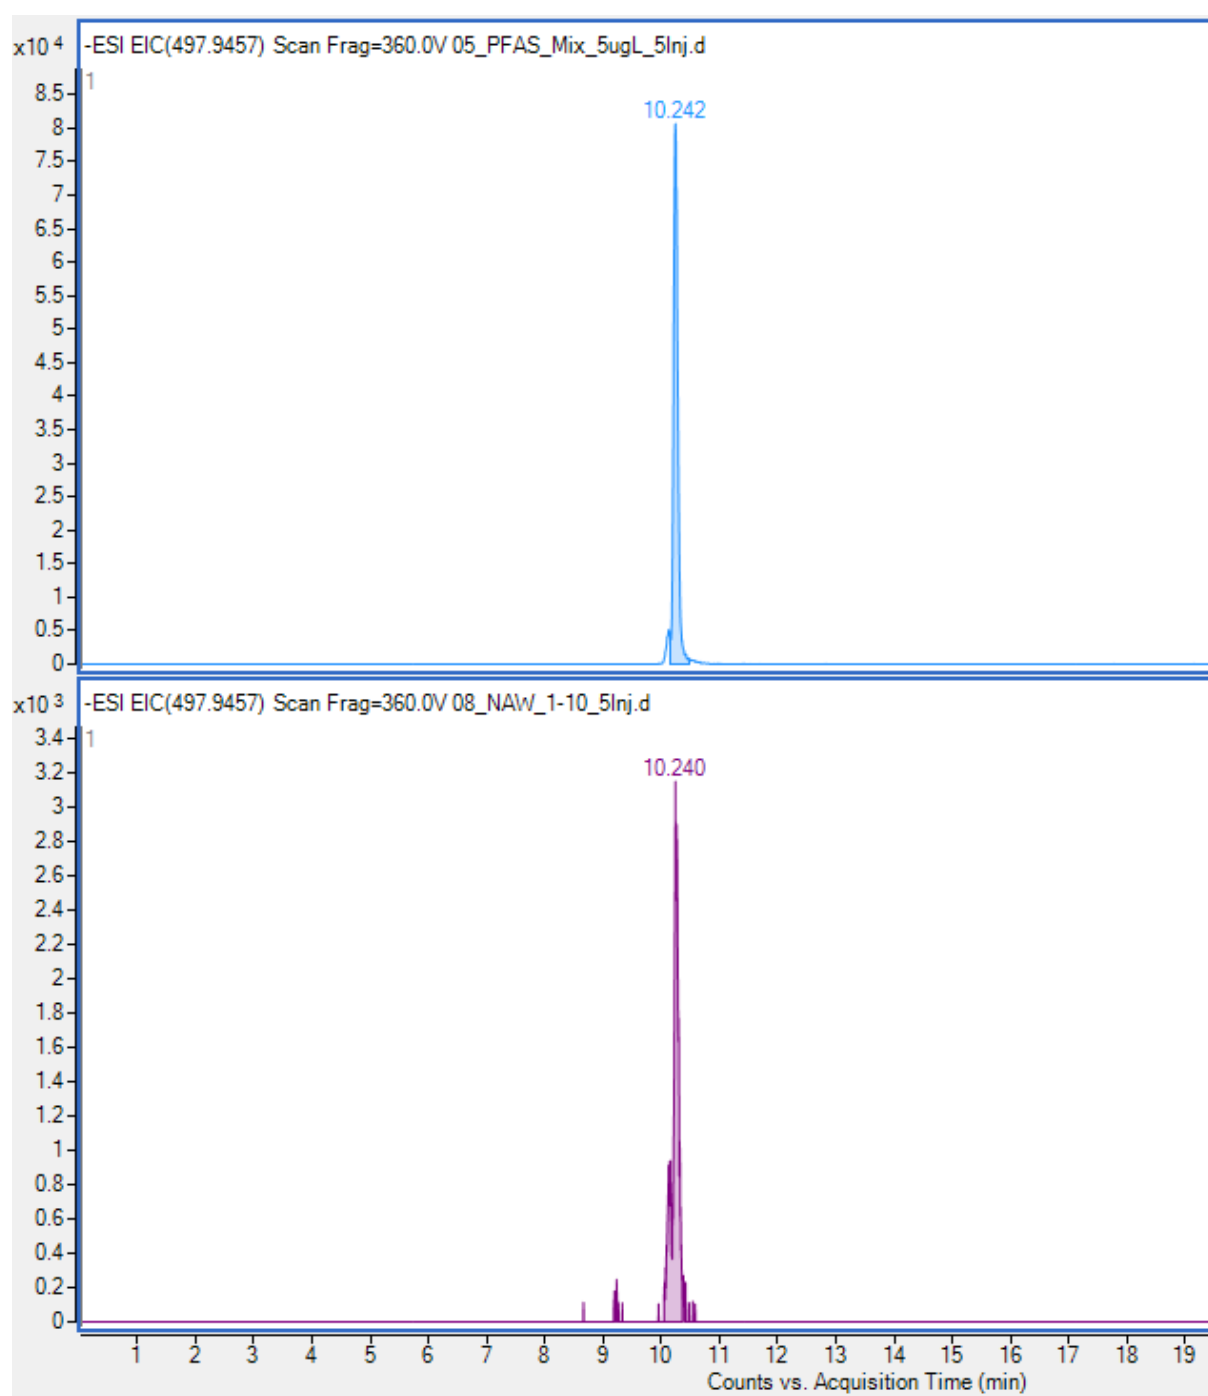

**Fig. S1.19** Top: EIC of FOSA standard 5 µg/L, bottom: 1/10 dilution of sample 2

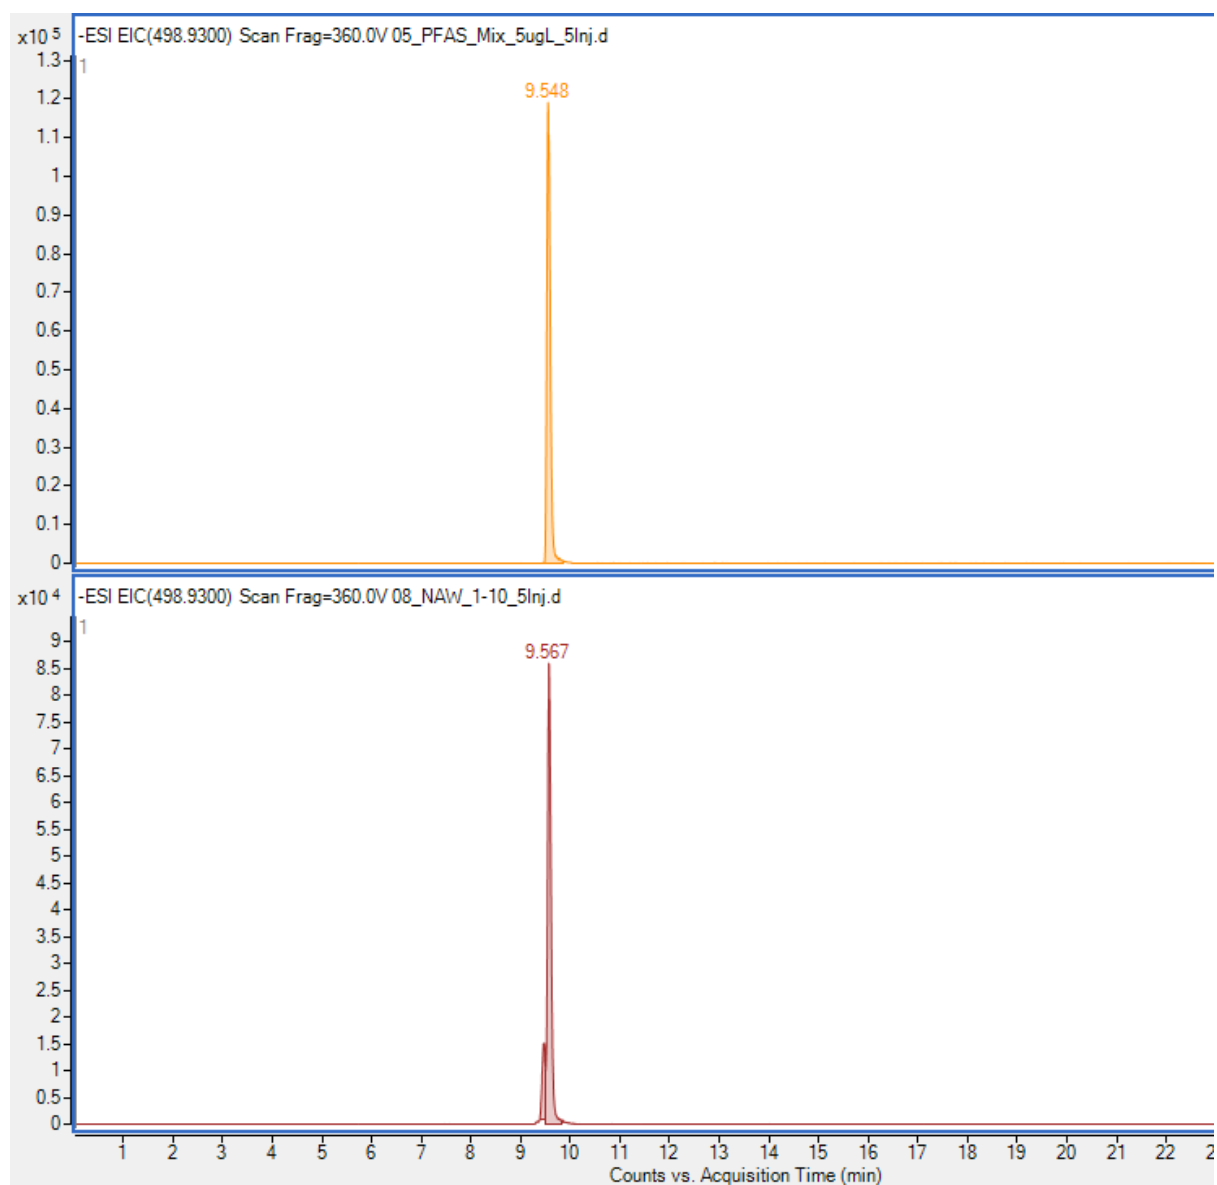

**Fig. S1.20** Top: EIC of PFOS standard 5  $\mu\text{g/L}$ , bottom: 1/10 dilution of sample 2

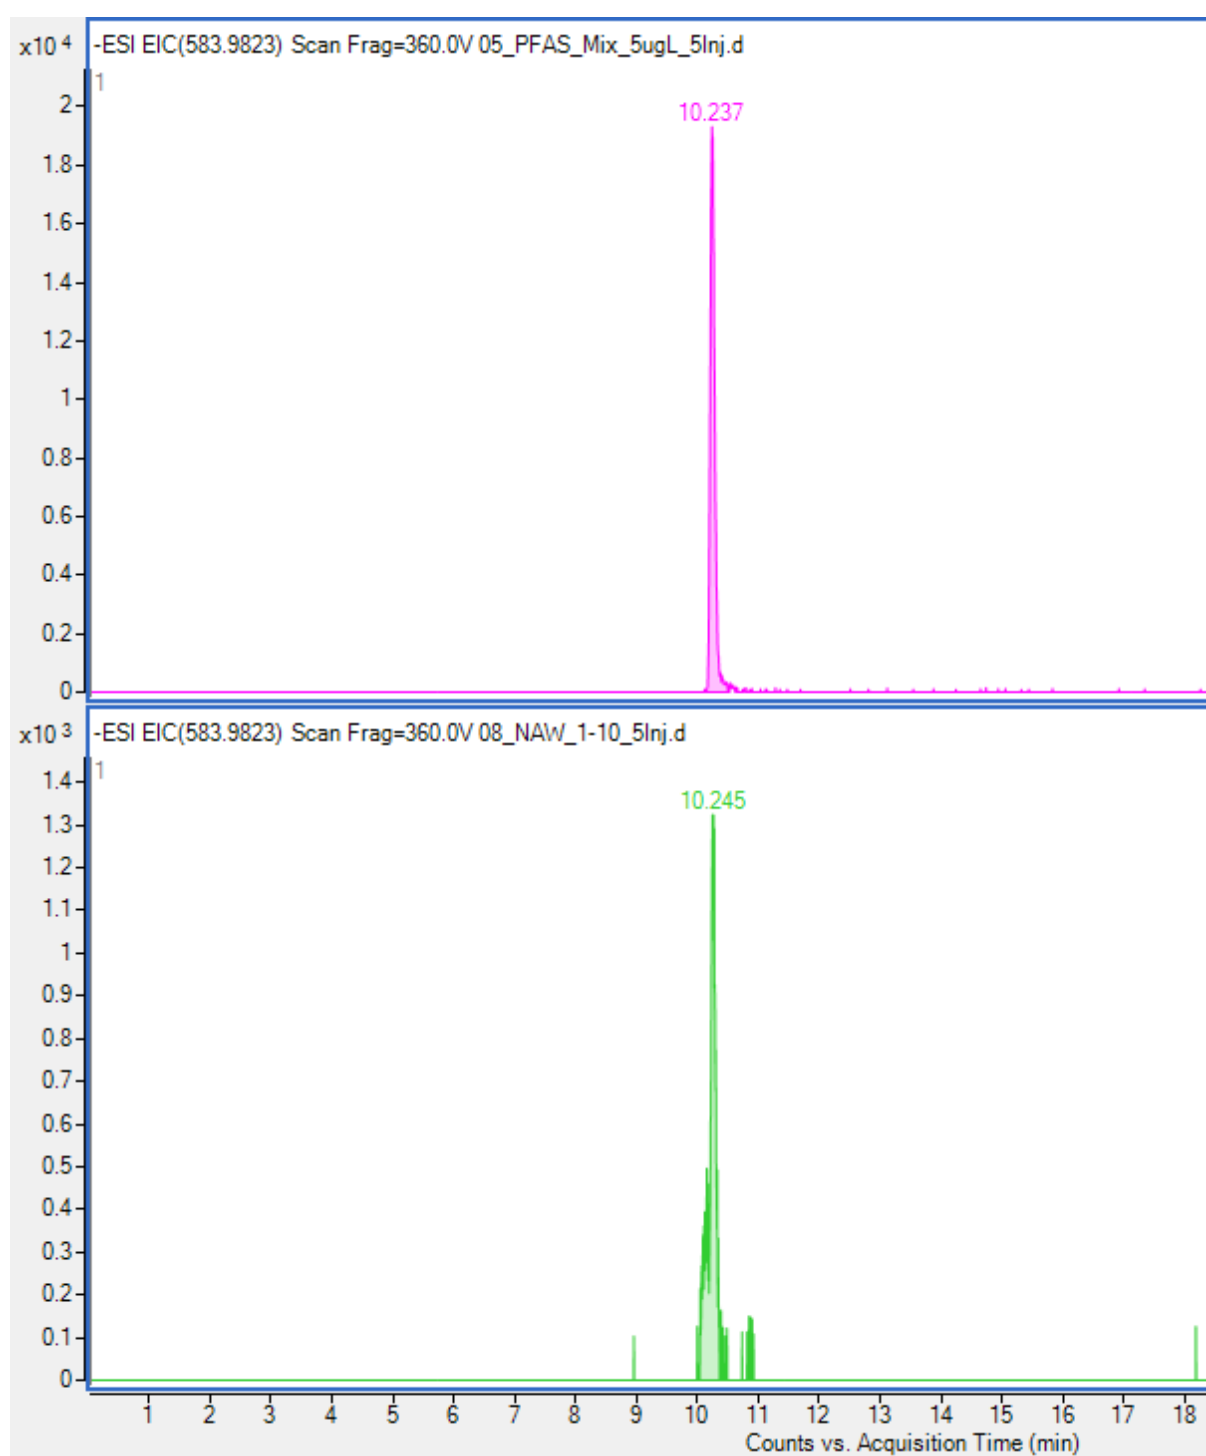

**Fig. S1.21** Top: EIC of EtFOSAA standard 5 µg/L, bottom: 1/10 dilution of sample 2

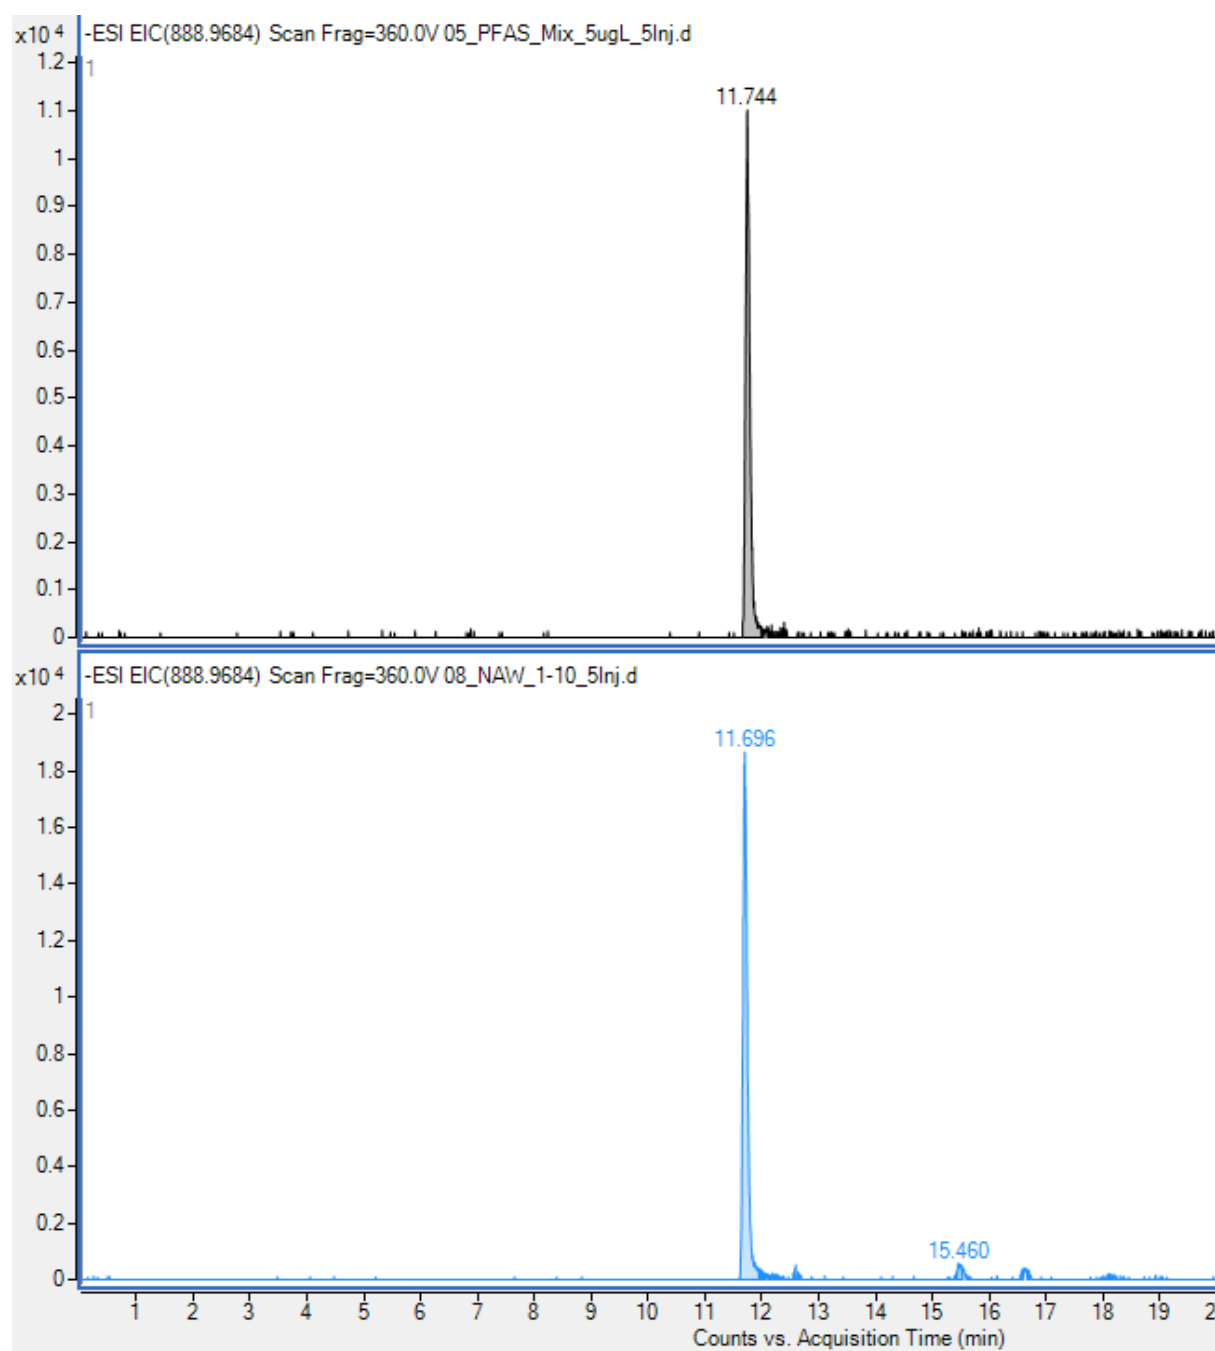

**Fig. S1.22** Top: EIC of 6:2 diPAP standard 5 µg/L, bottom: 1/10 dilution of sample 2

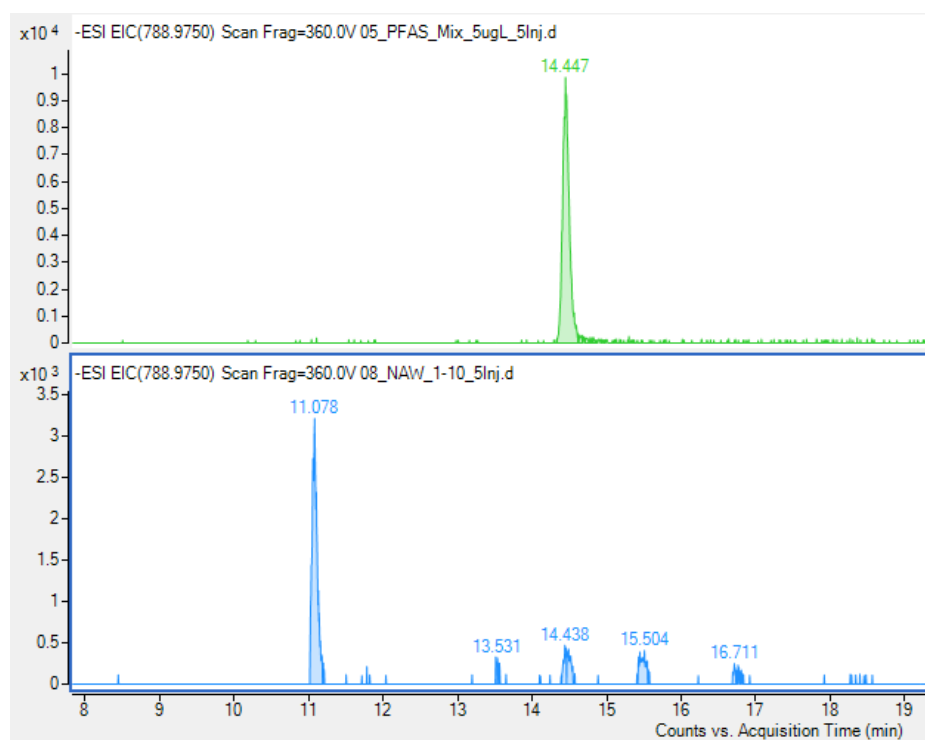

**Fig. S1.22b** Top: EIC of triPAP standard 5 $\mu$ g/L, bottom: 1/10 dilution of sample 2

Sample 3: Confirmation of the identification with an authentic standard

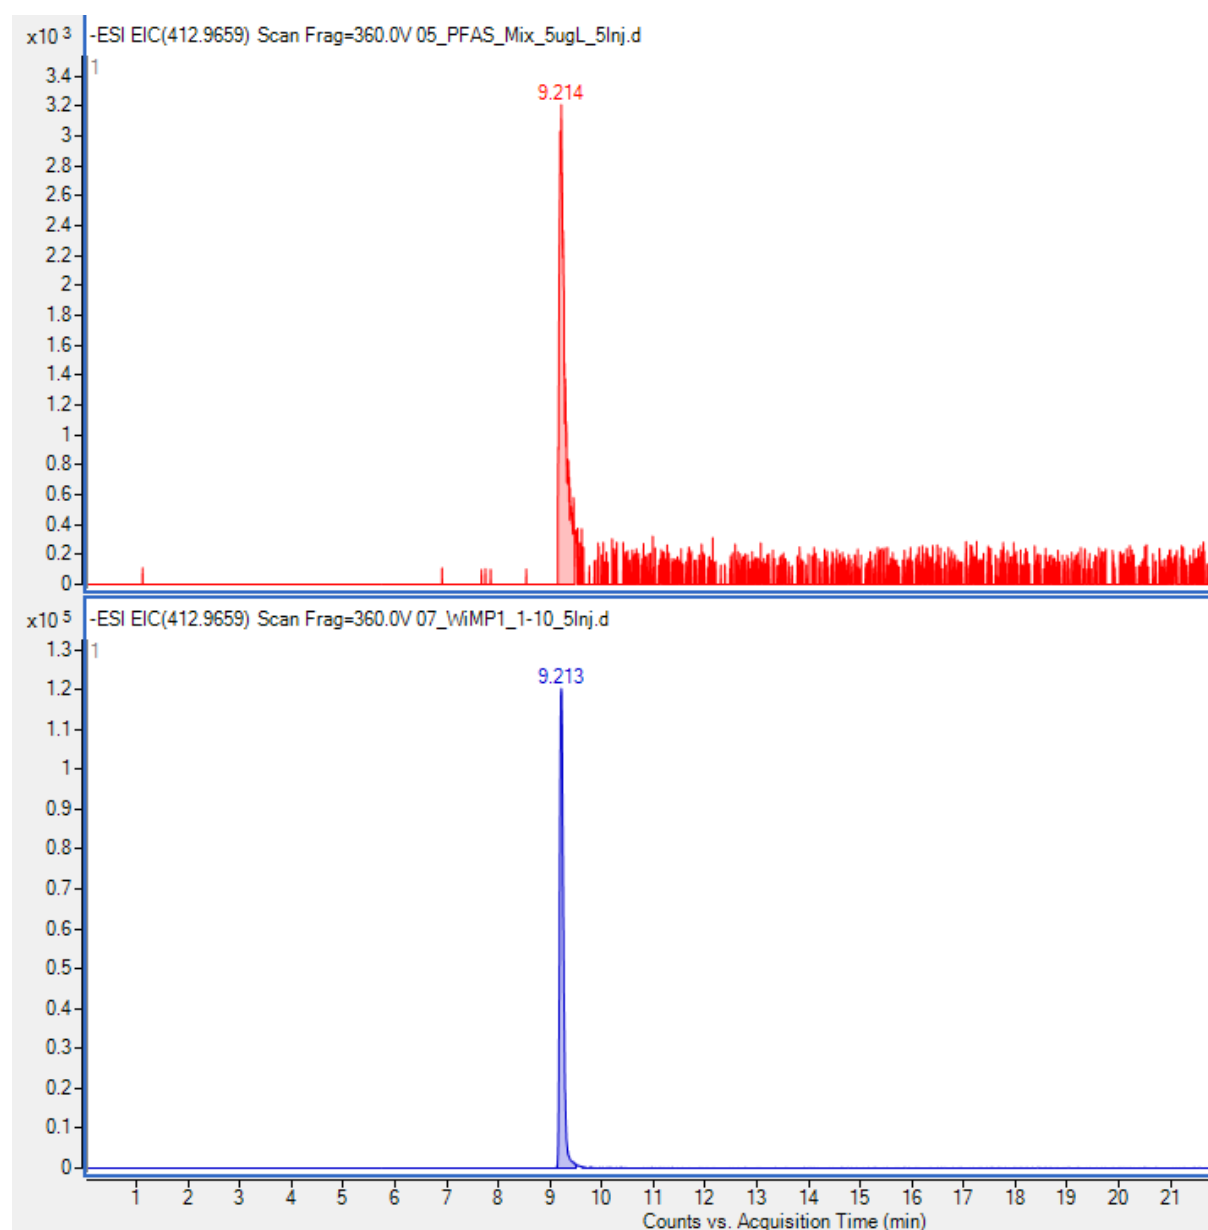

**Fig. S1.23** Top: EIC of PFOA standard 5  $\mu\text{g/L}$ , bottom: 1/10 dilution of sample 3

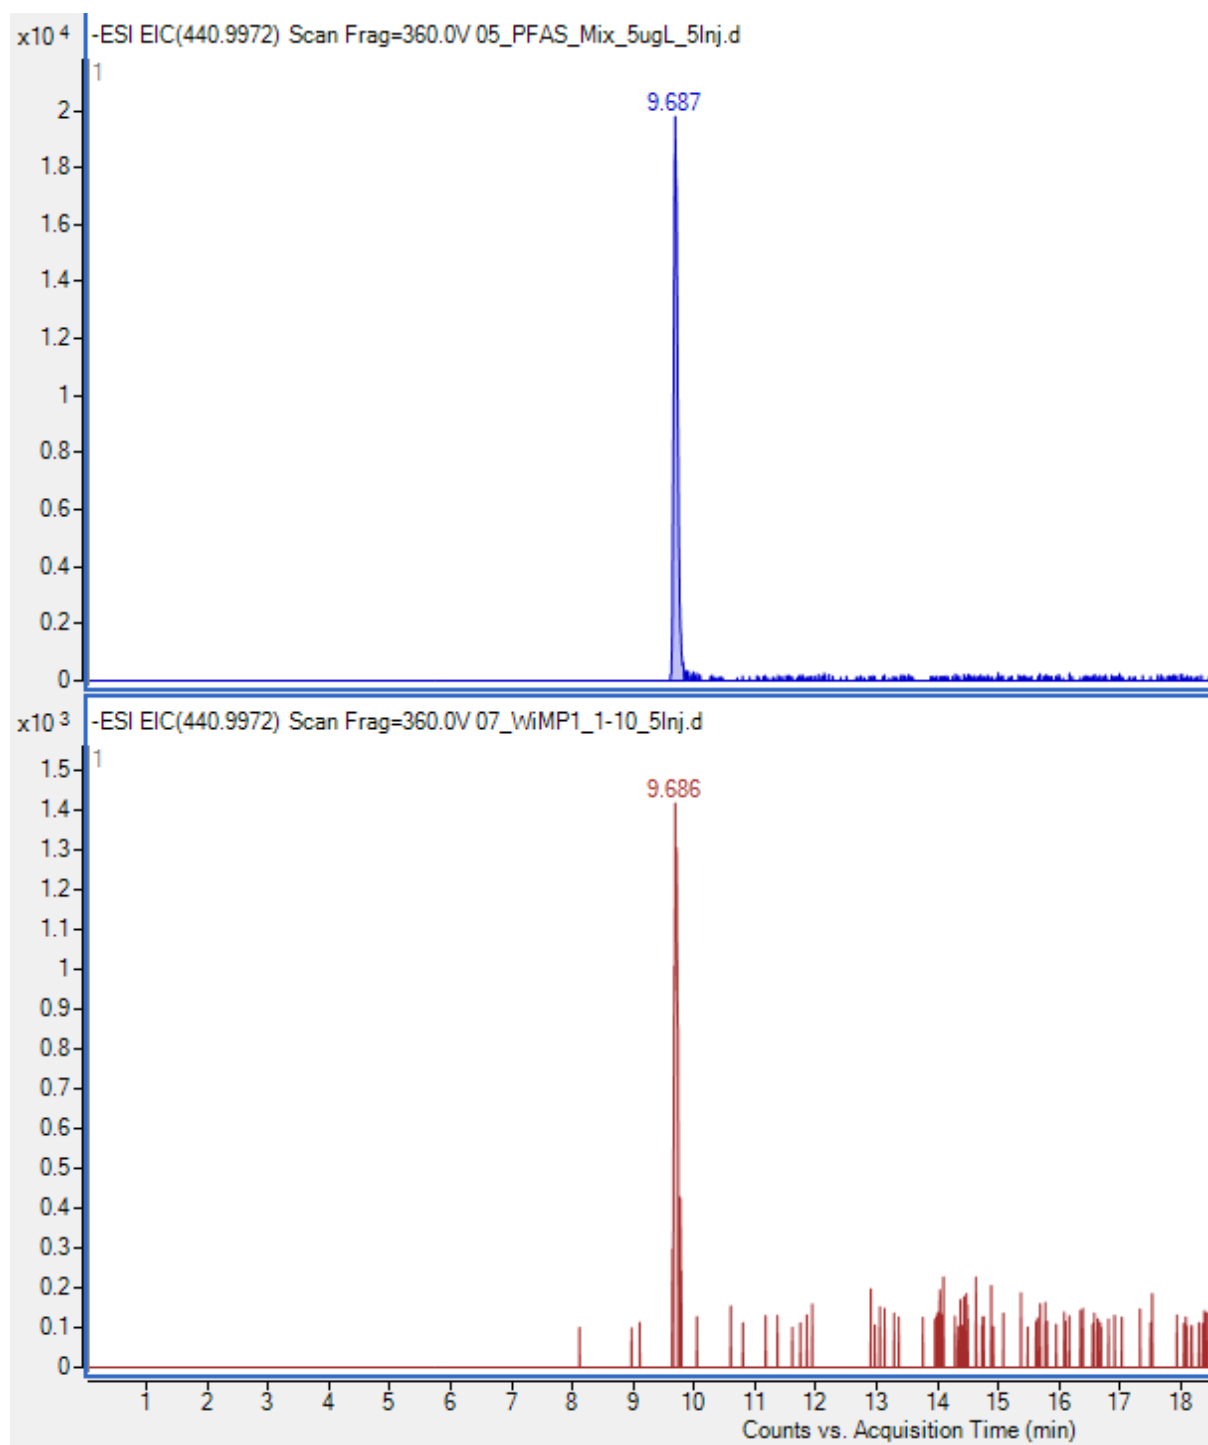

**Fig. S1.24** Top: EIC of 7:3 PFCA standard 5  $\mu\text{g/L}$ , bottom: 1/10 dilution of sample 3

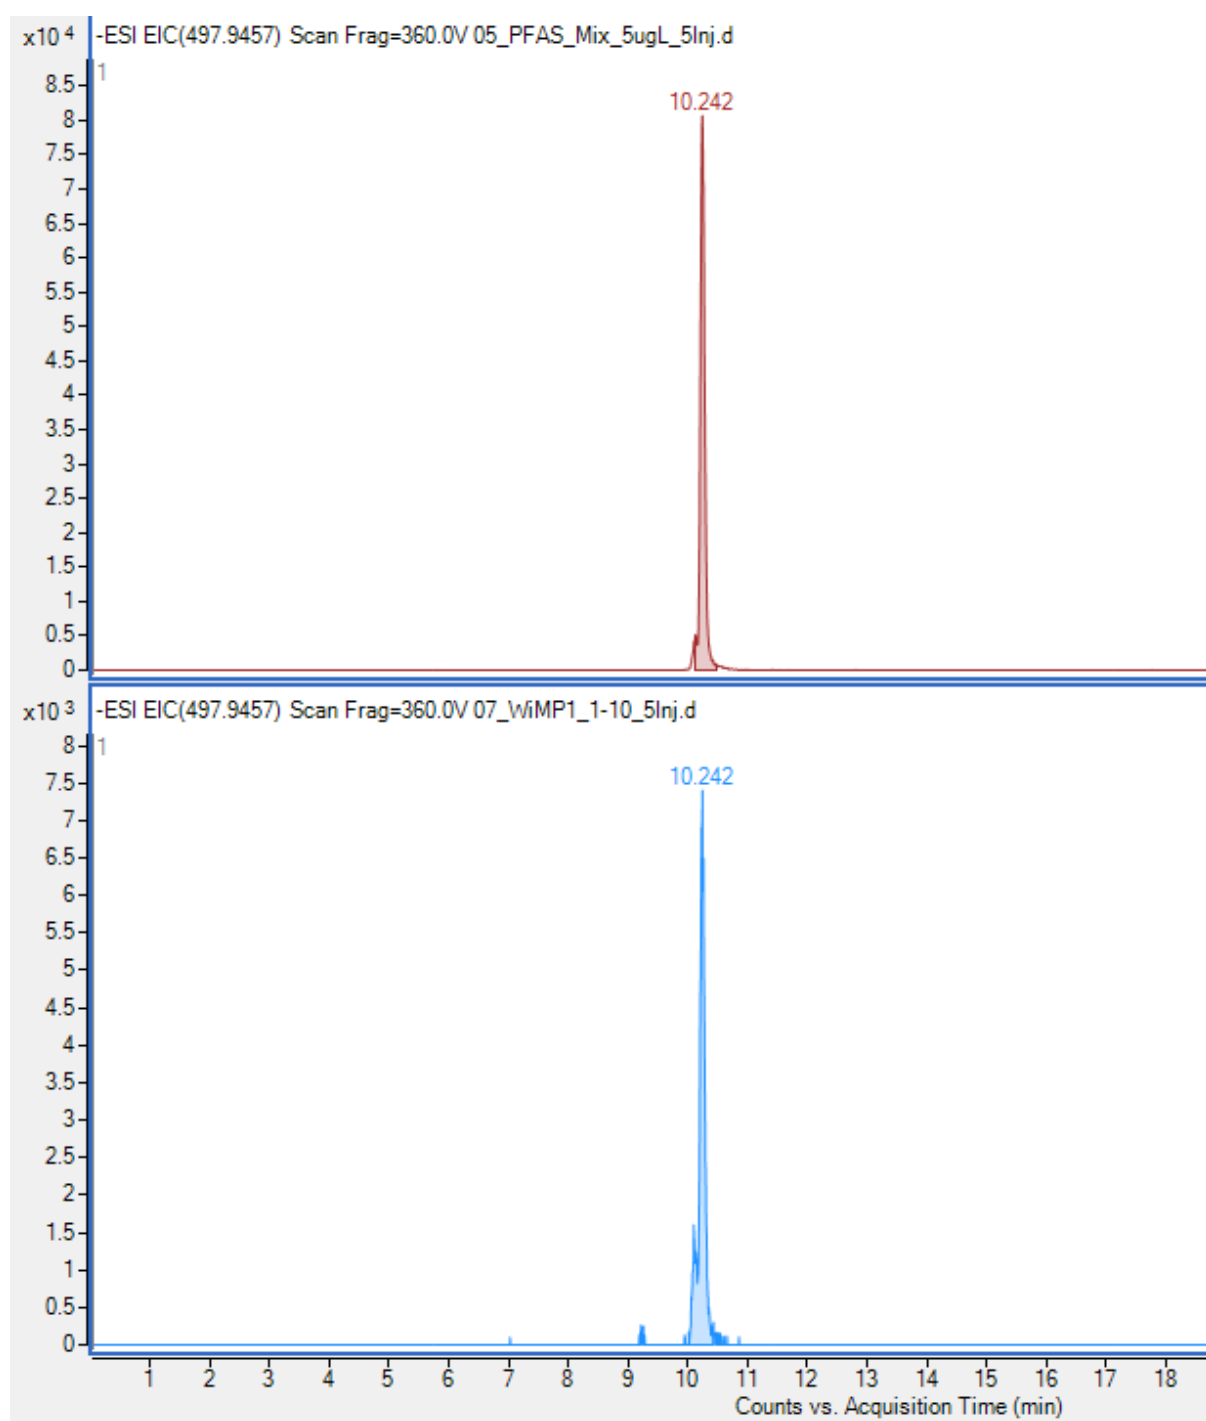

**Fig. S1.25** Top: EIC of FOSA standard 5  $\mu\text{g/L}$ , bottom: 1/10 dilution of sample 3

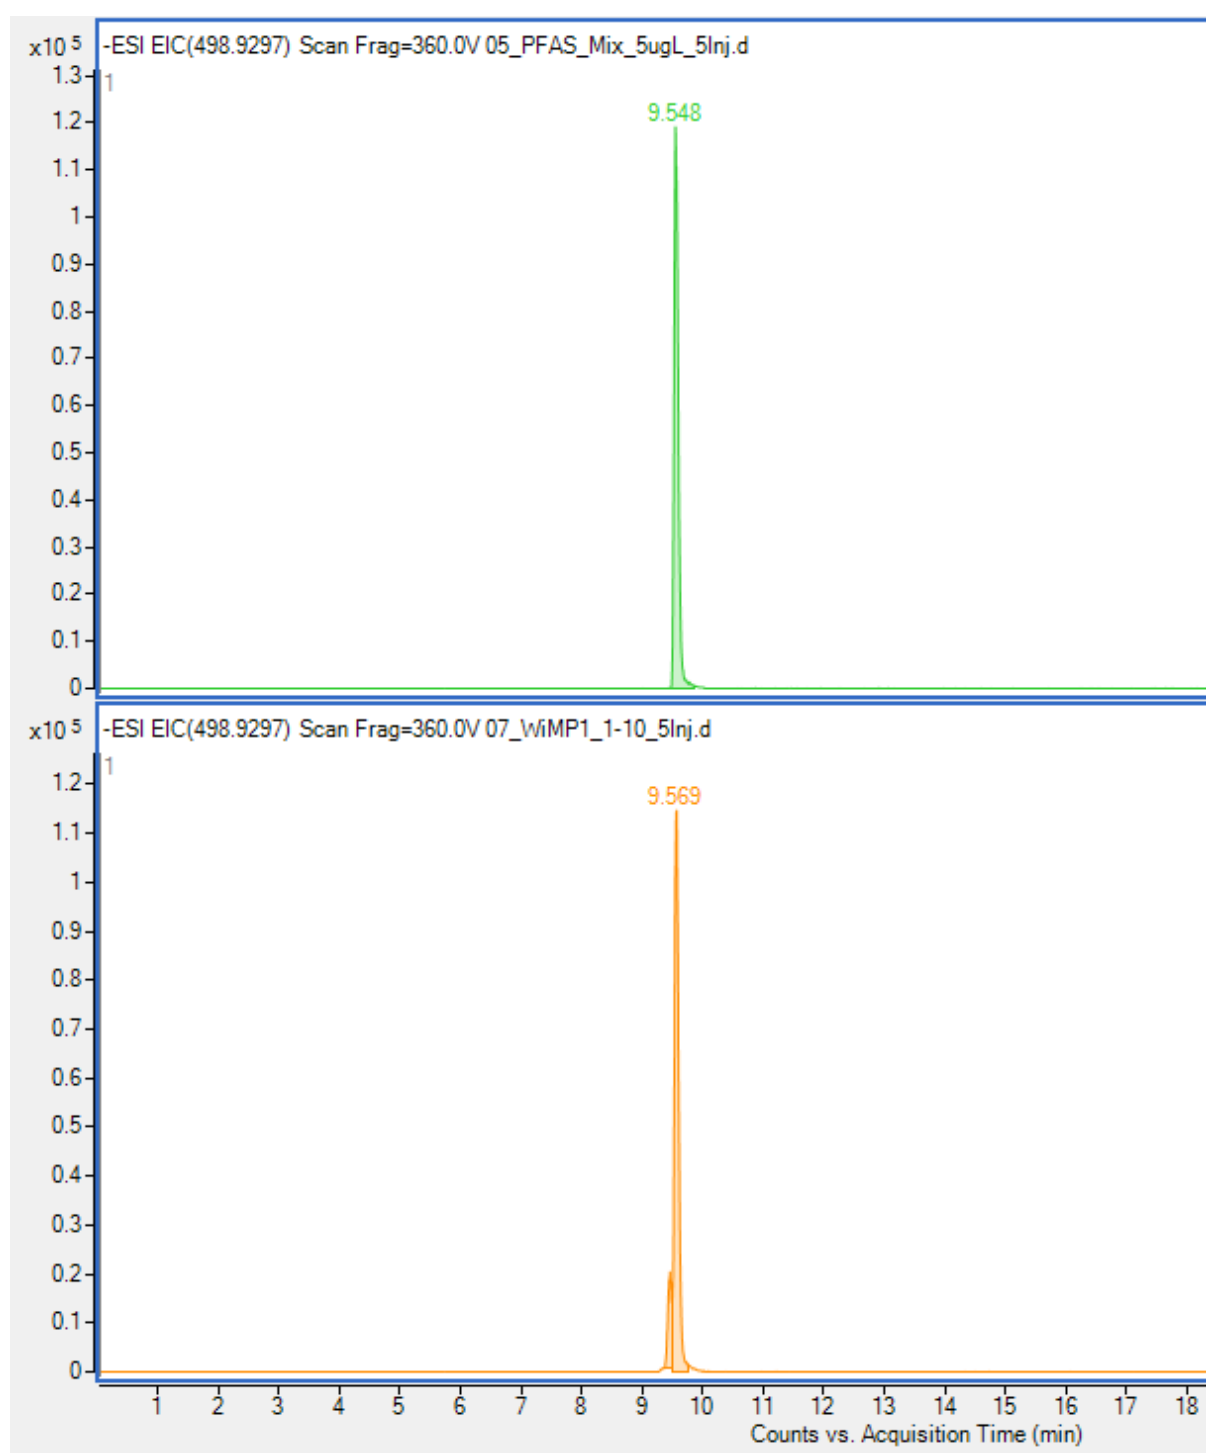

**Fig. S1.26** Top: EIC of PFOS standard 5 µg/L, bottom: 1/10 dilution of sample 3

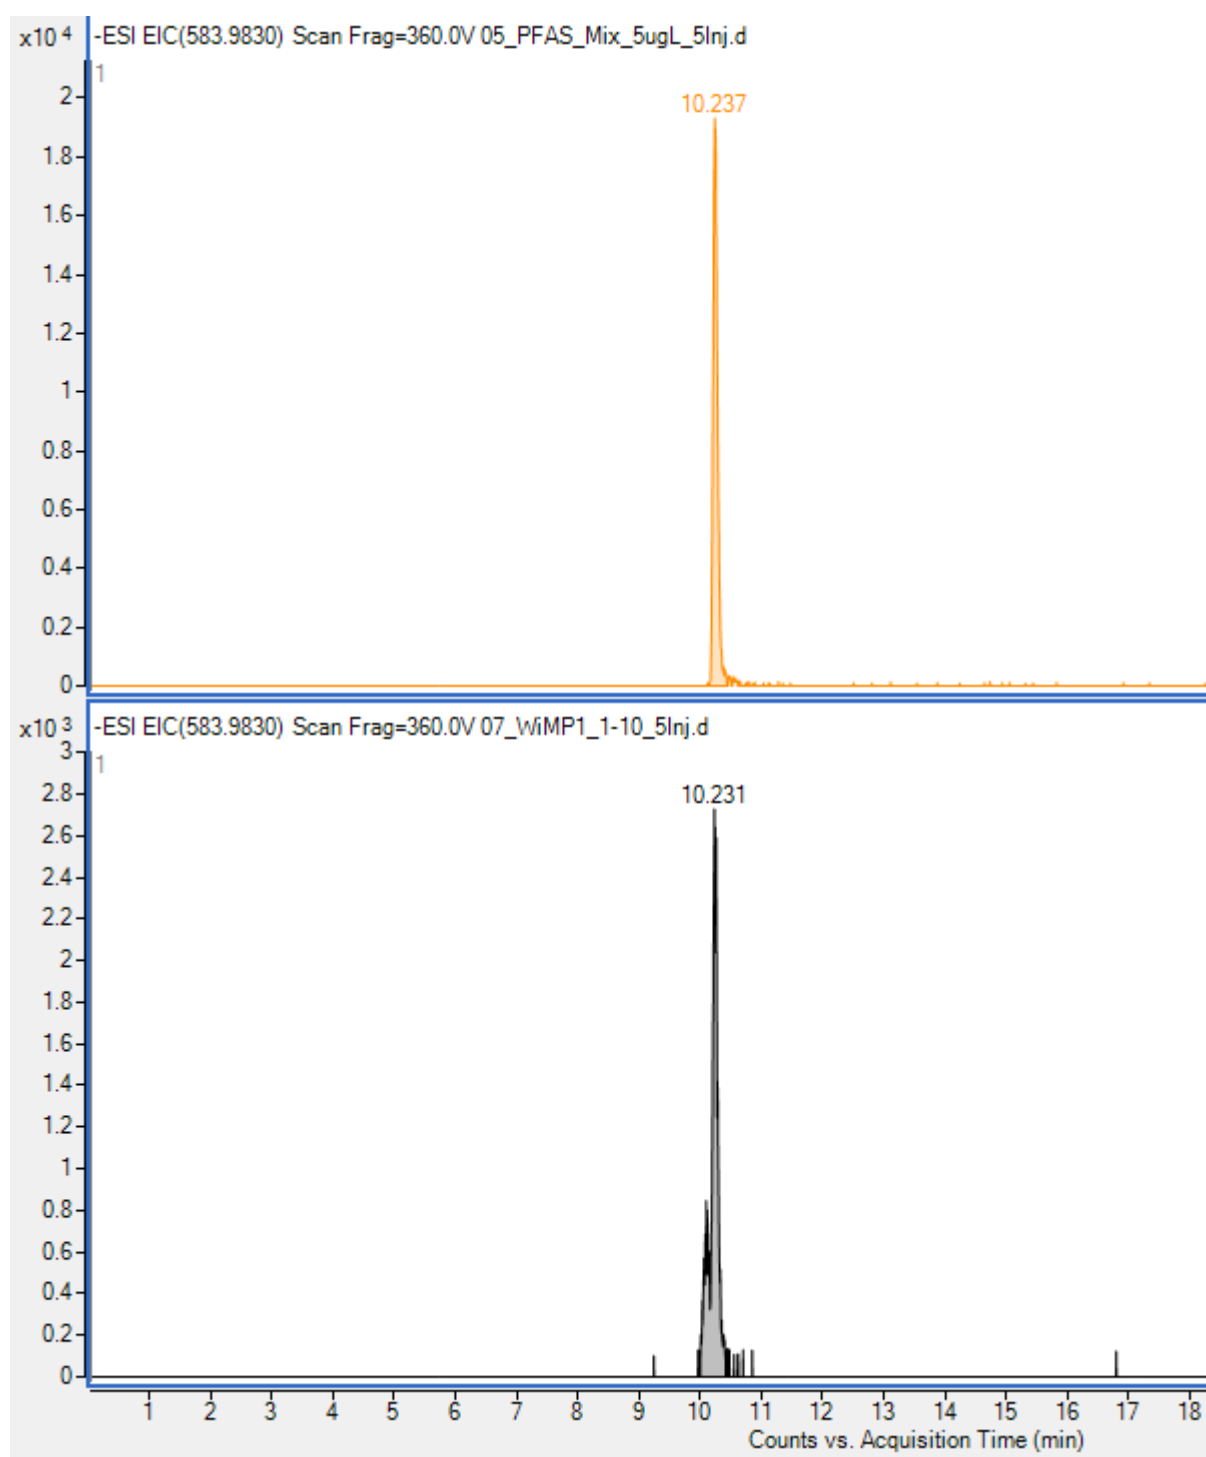

**Fig. S1.27** Top: EIC of EtFOSAA standard 5 µg/L, bottom: 1/10 dilution of sample 3

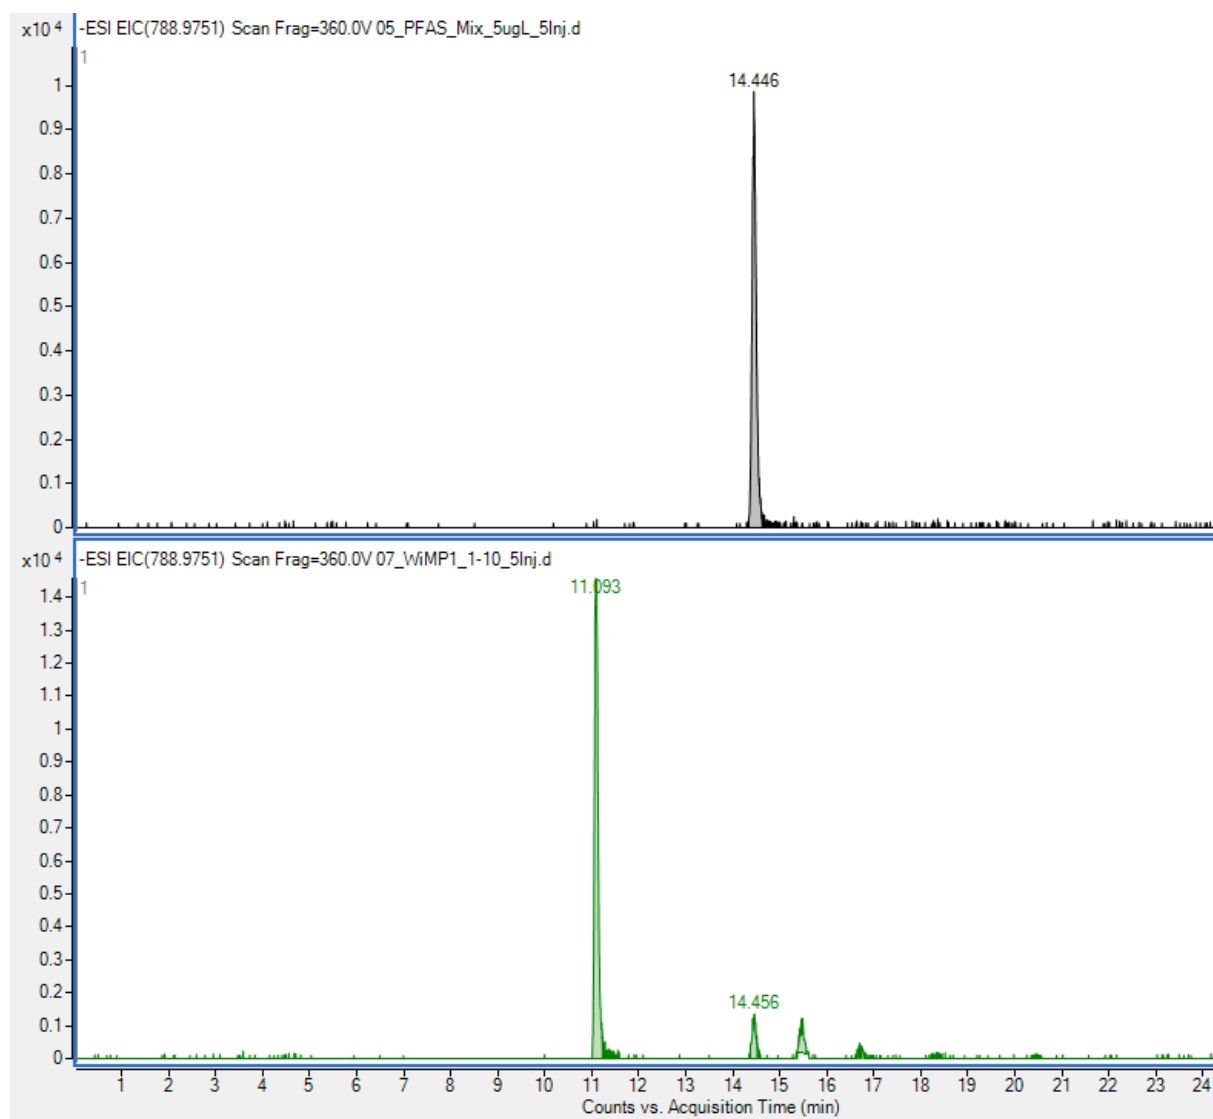

**Fig. S1.28** Top: EIC of 6:2 triPAP standard 5 µg/L, bottom: 1/10 dilution of sample 3

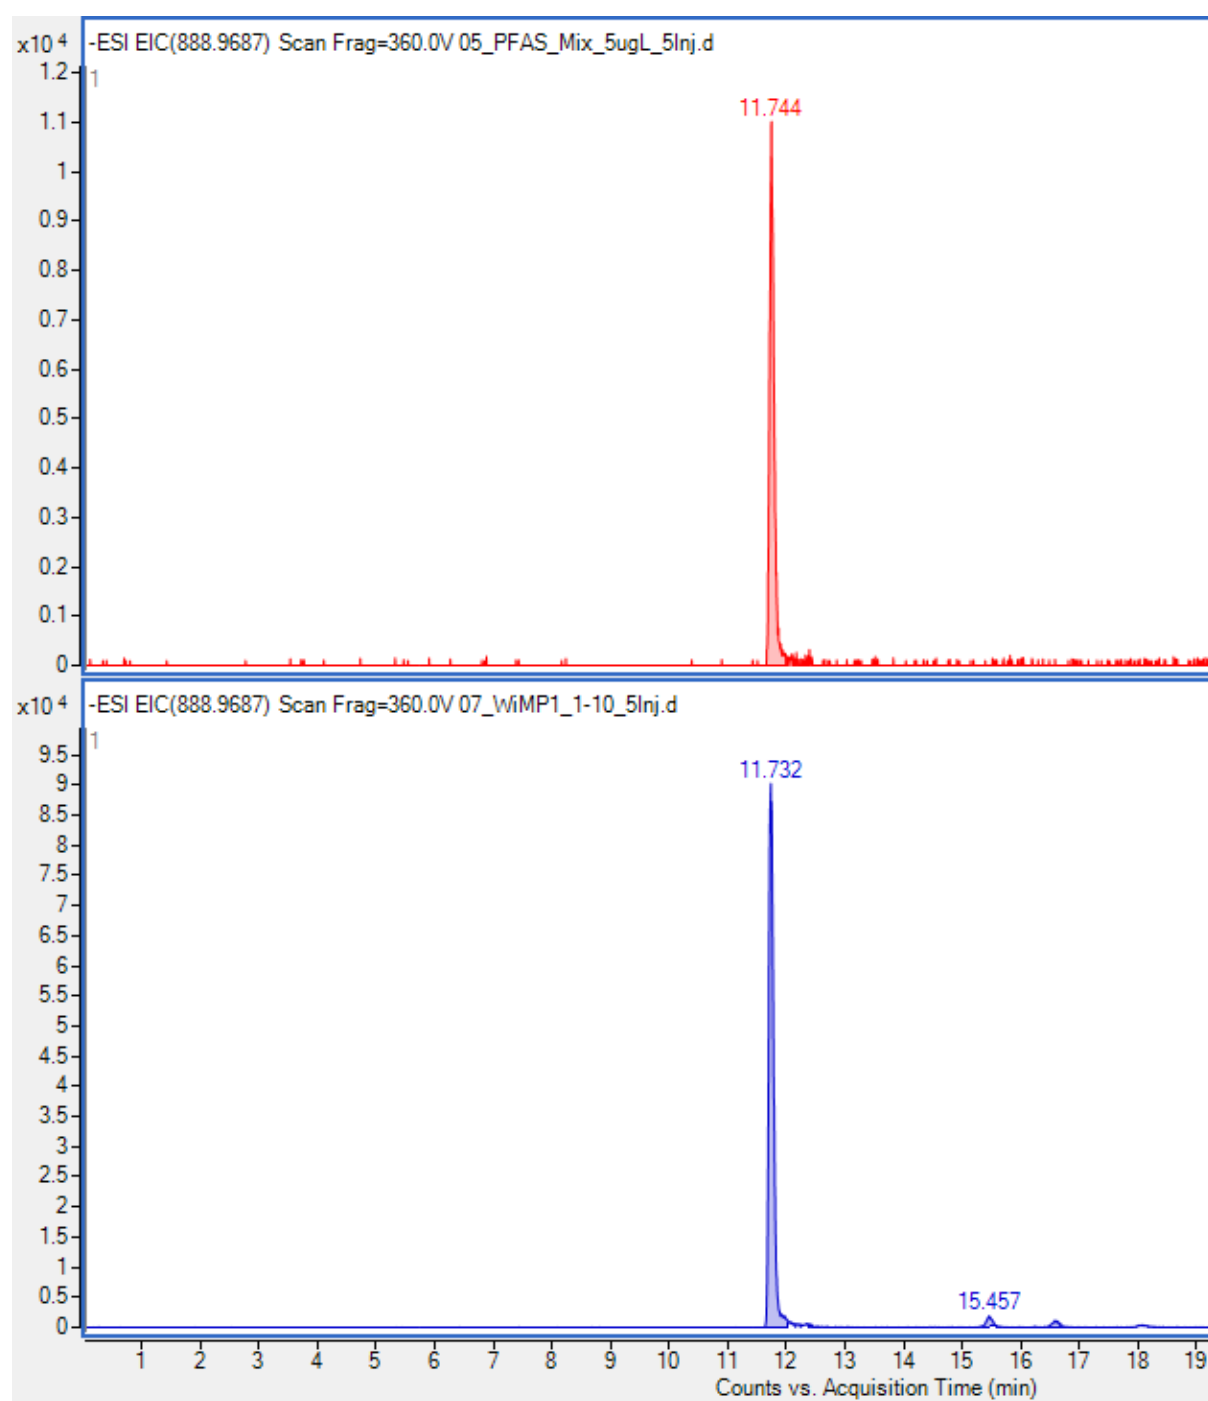

**Fig. S1.29** Top: EIC of 6:2 / 8:2 diPAP standard 5  $\mu\text{g/L}$ , bottom: 1/10 dilution of sample 3

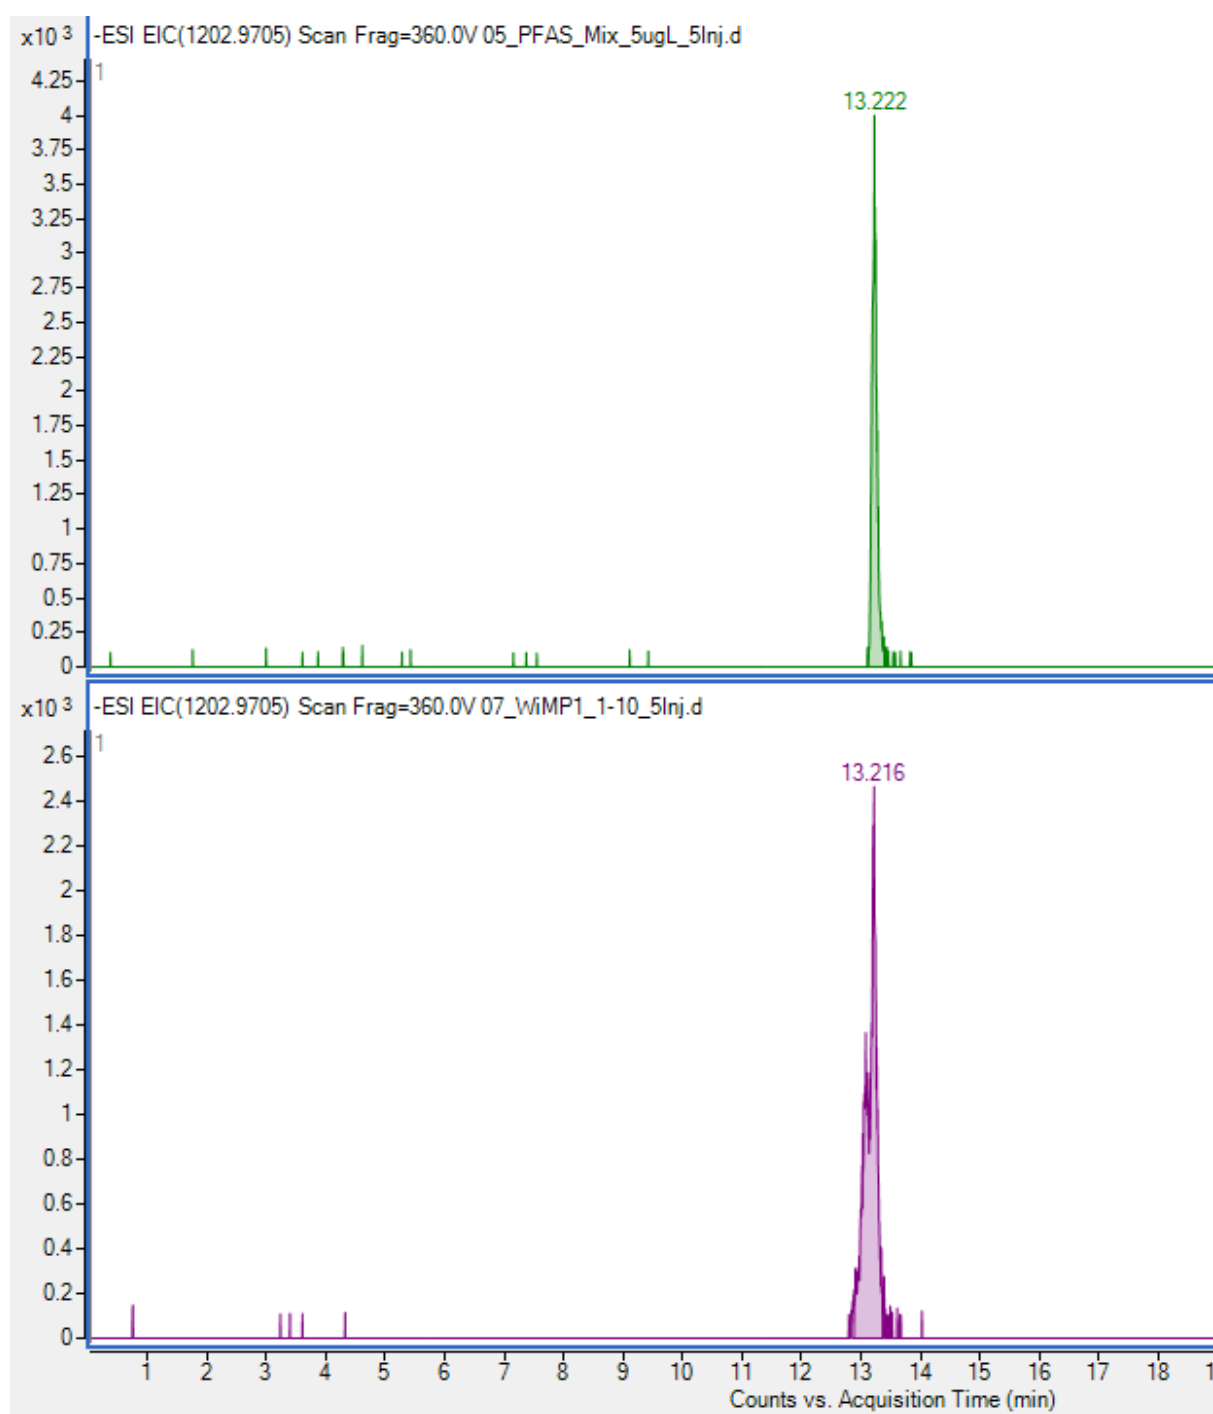

**Fig. S1.30** Top: EIC of diSAMPAP standard 5 µg/L, bottom: 1/10 dilution of sample 3

## Sample 4 Confirmation of the identification with an authentic standard

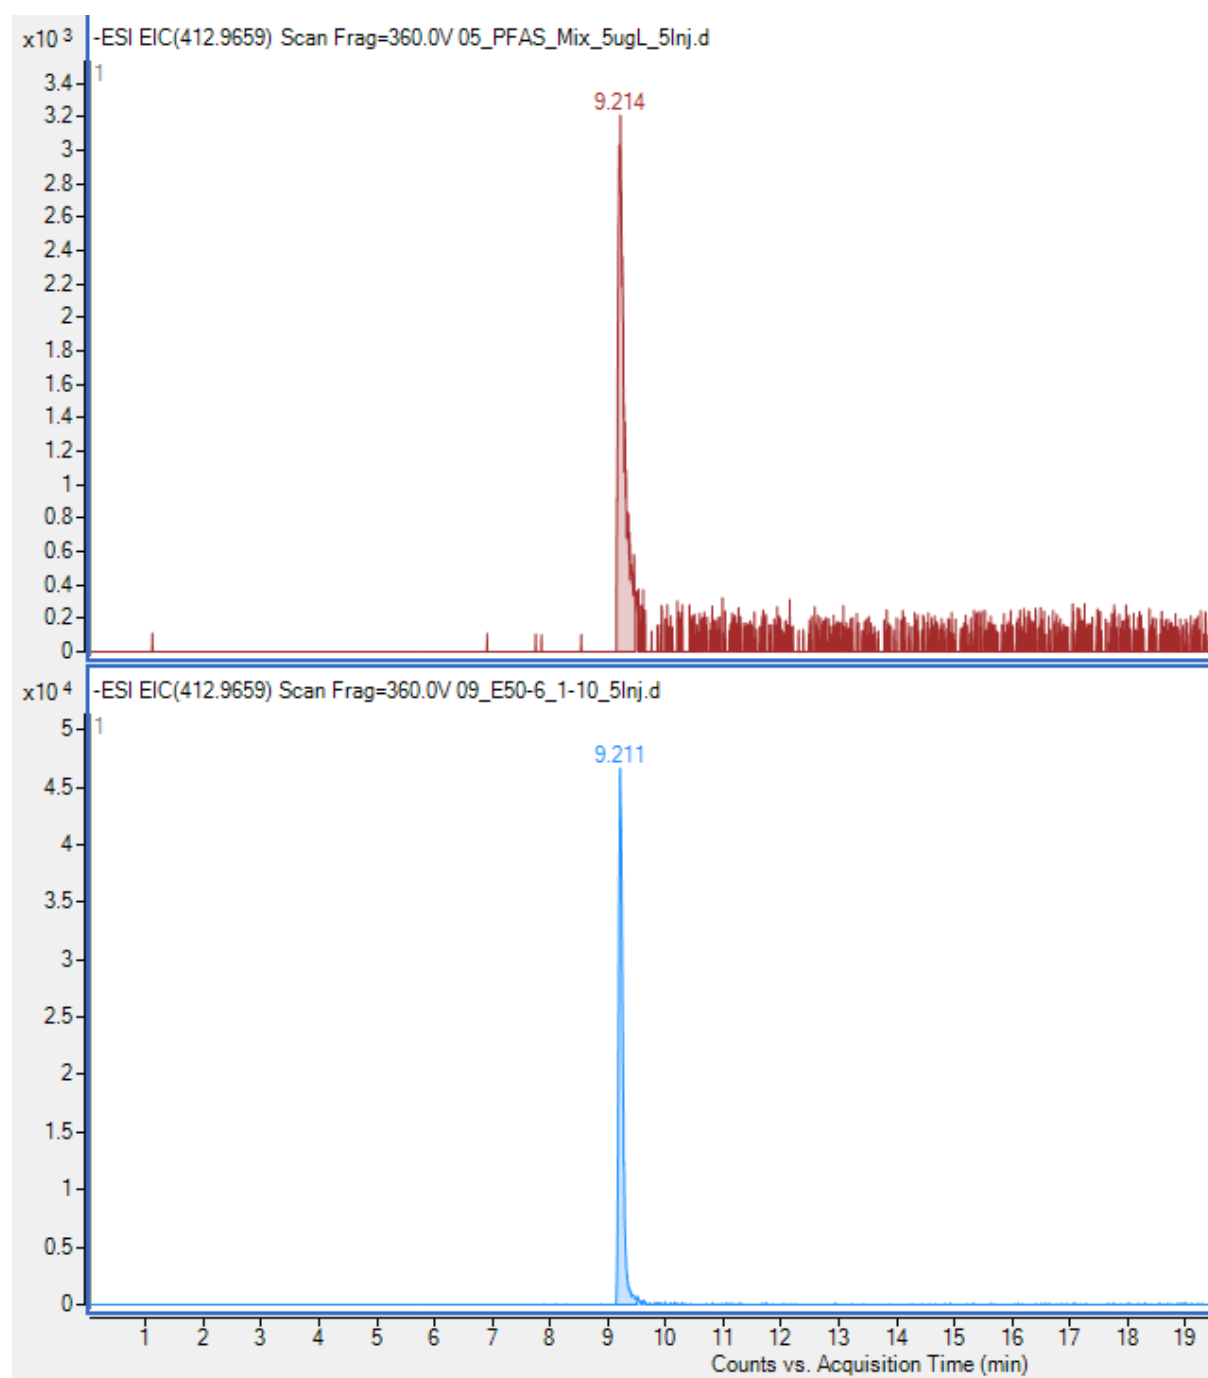

**Fig. S1.31** Top: EIC of PFOA standard 5 µg/L, bottom: 1/10 dilution of sample 4

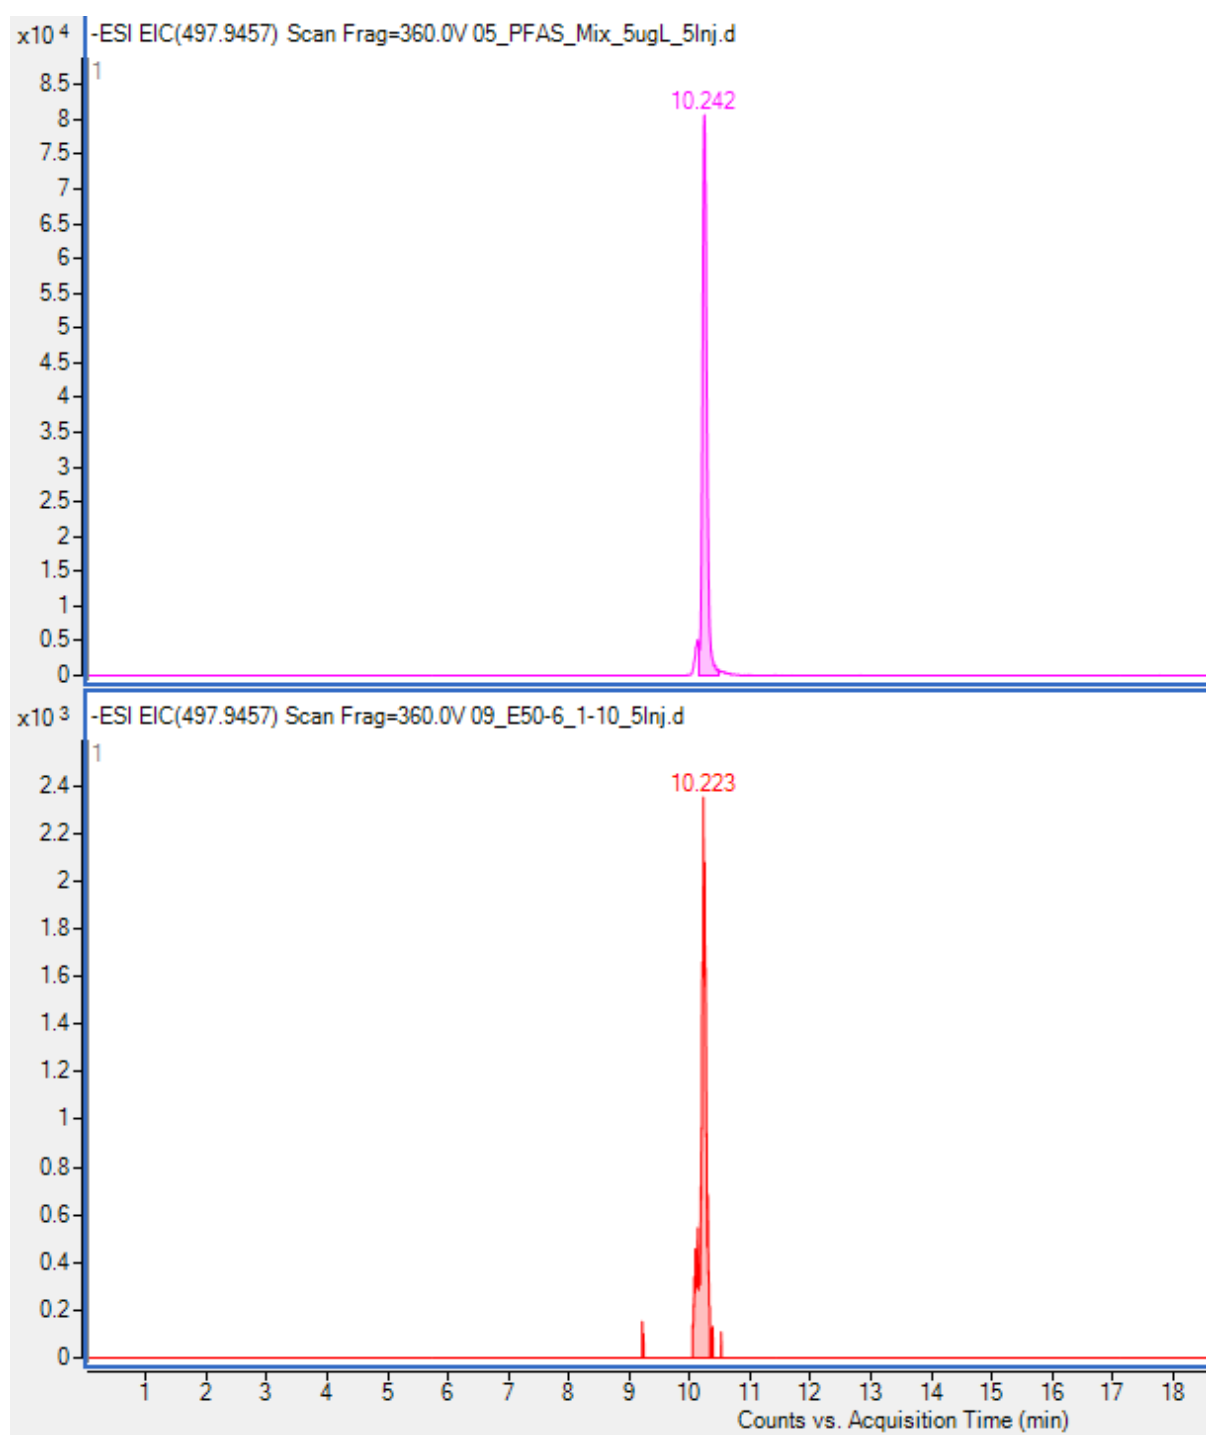

**Fig. S1.32** Top: EIC of FOSA standard 5  $\mu\text{g/L}$ , bottom: 1/10 dilution of sample 4

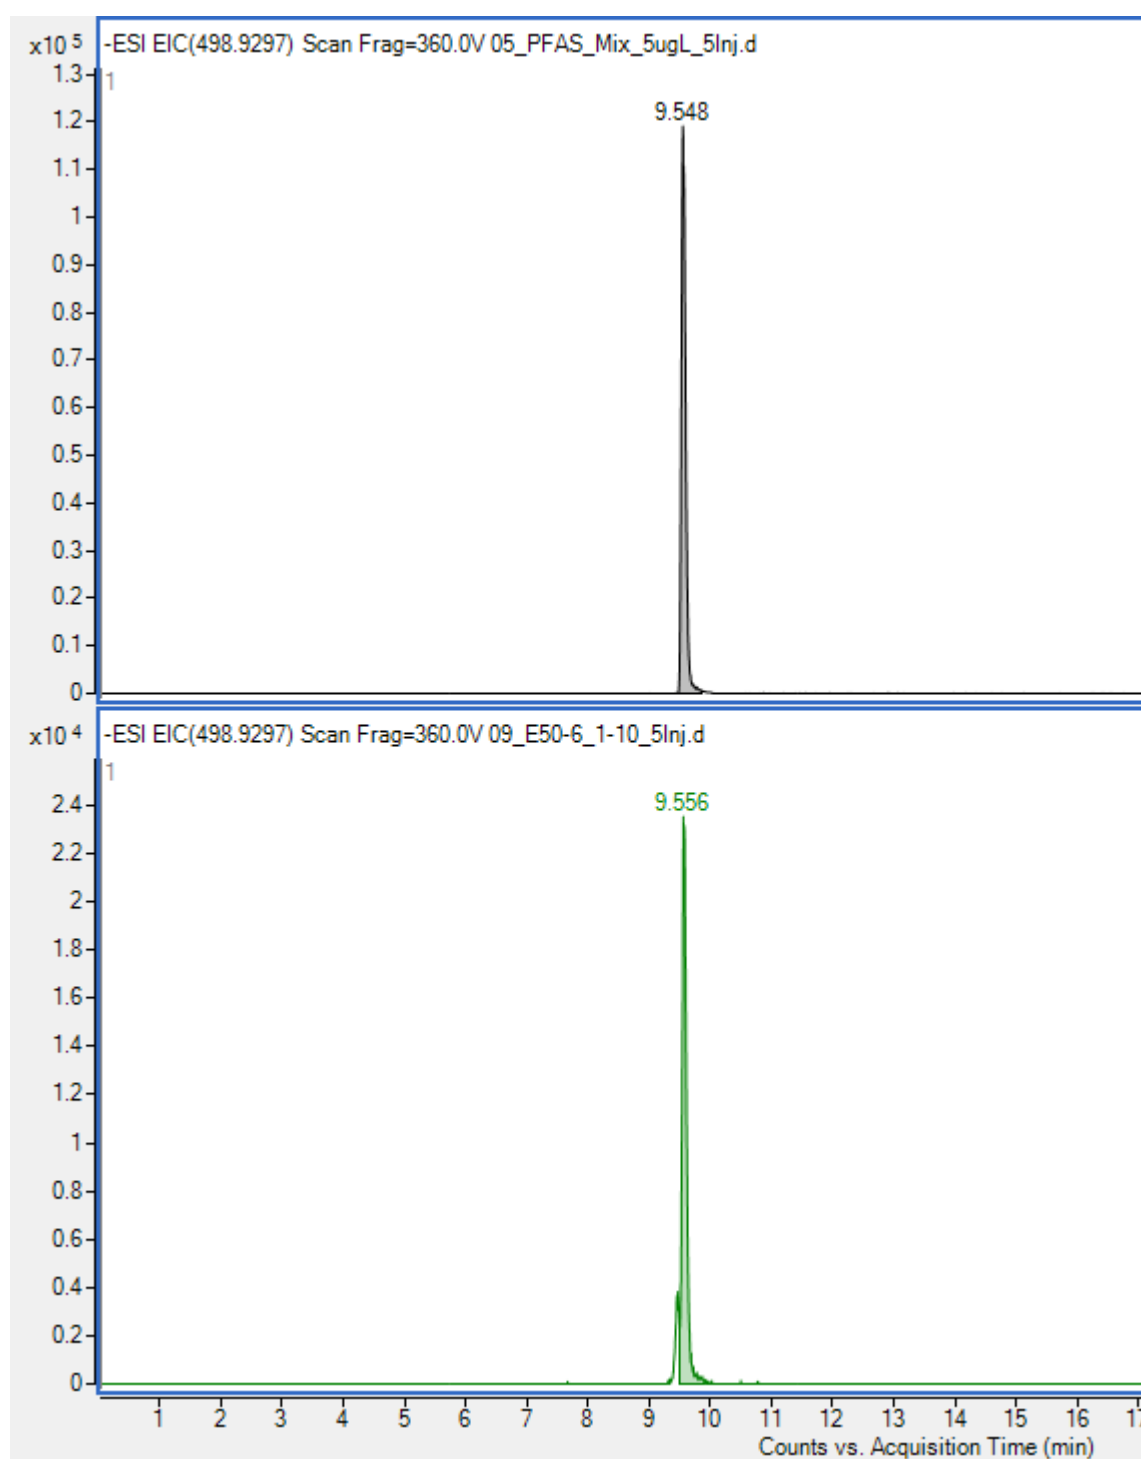

**Fig. S1.33** Top: EIC of PFOS standard 5  $\mu\text{g/L}$ , bottom: 1/10 dilution of sample 4

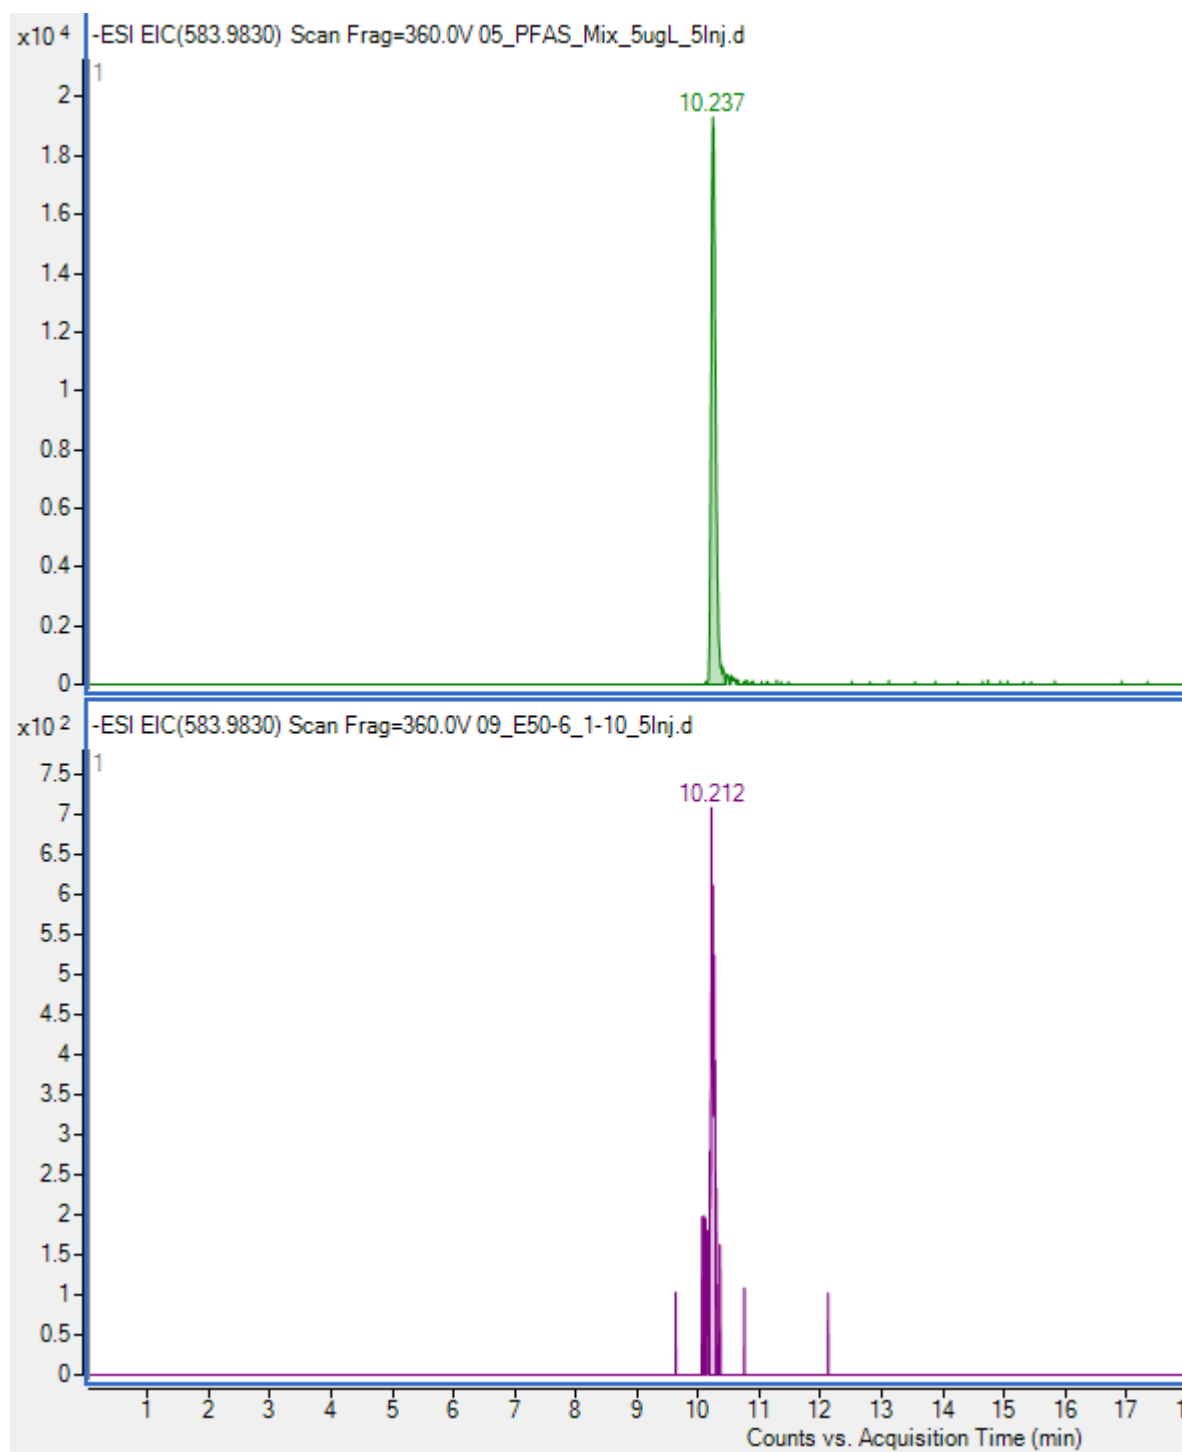

**Fig. S1.34** Top: EIC of EtFOSAA standard 5 µg/L, bottom: 1/10 dilution of sample 4

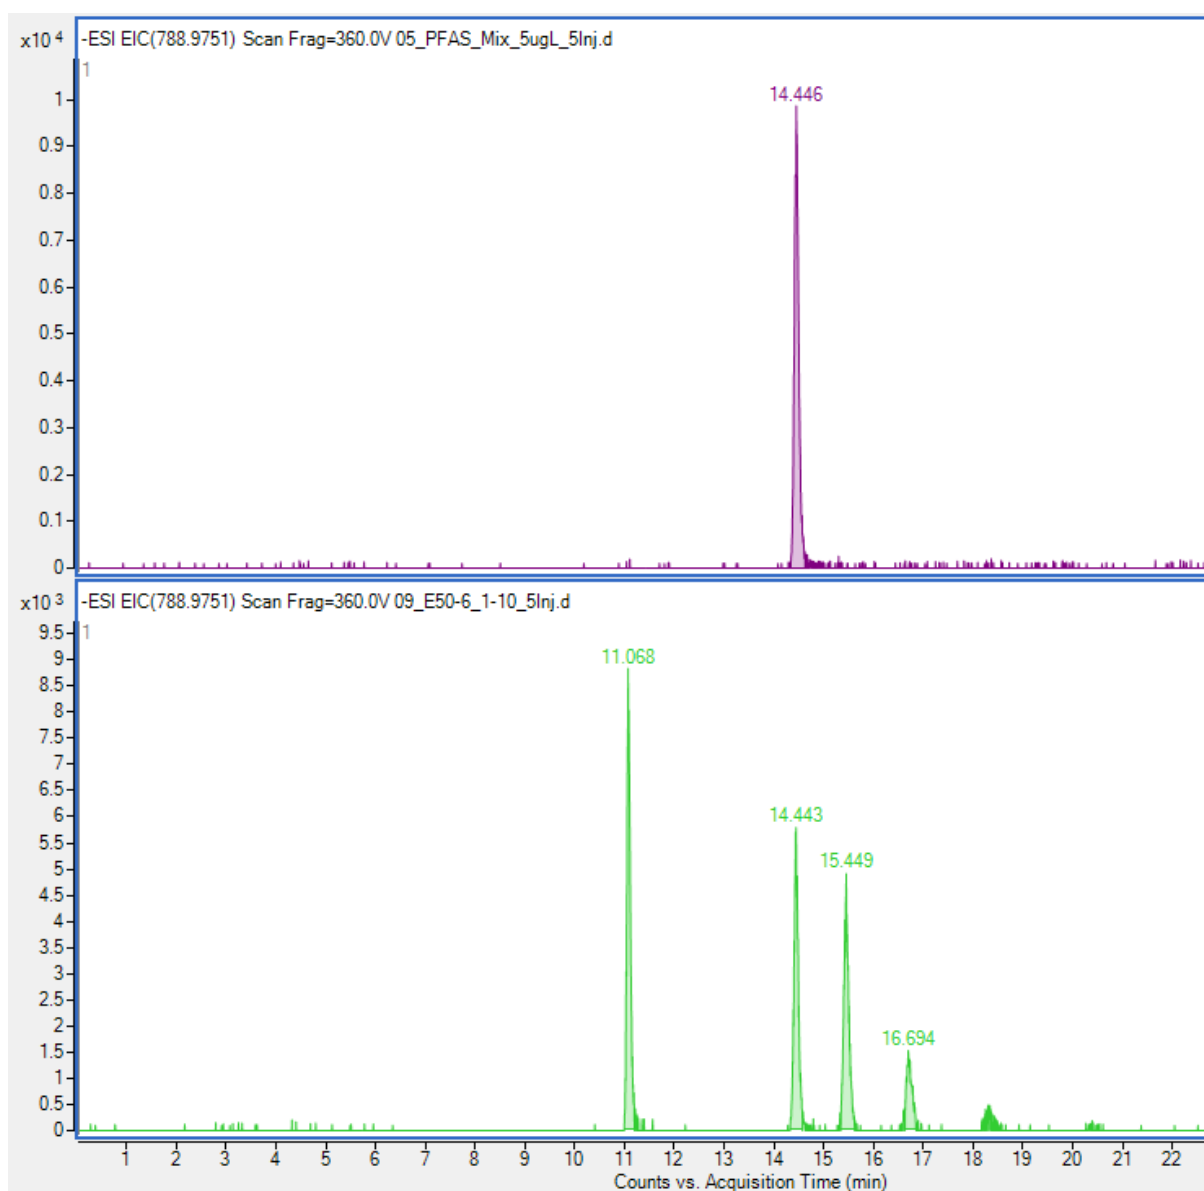

**Fig. S1.35** Top: EIC of 6:2 triPAP standard 5 µg/L, bottom: 1/10 dilution of sample 4

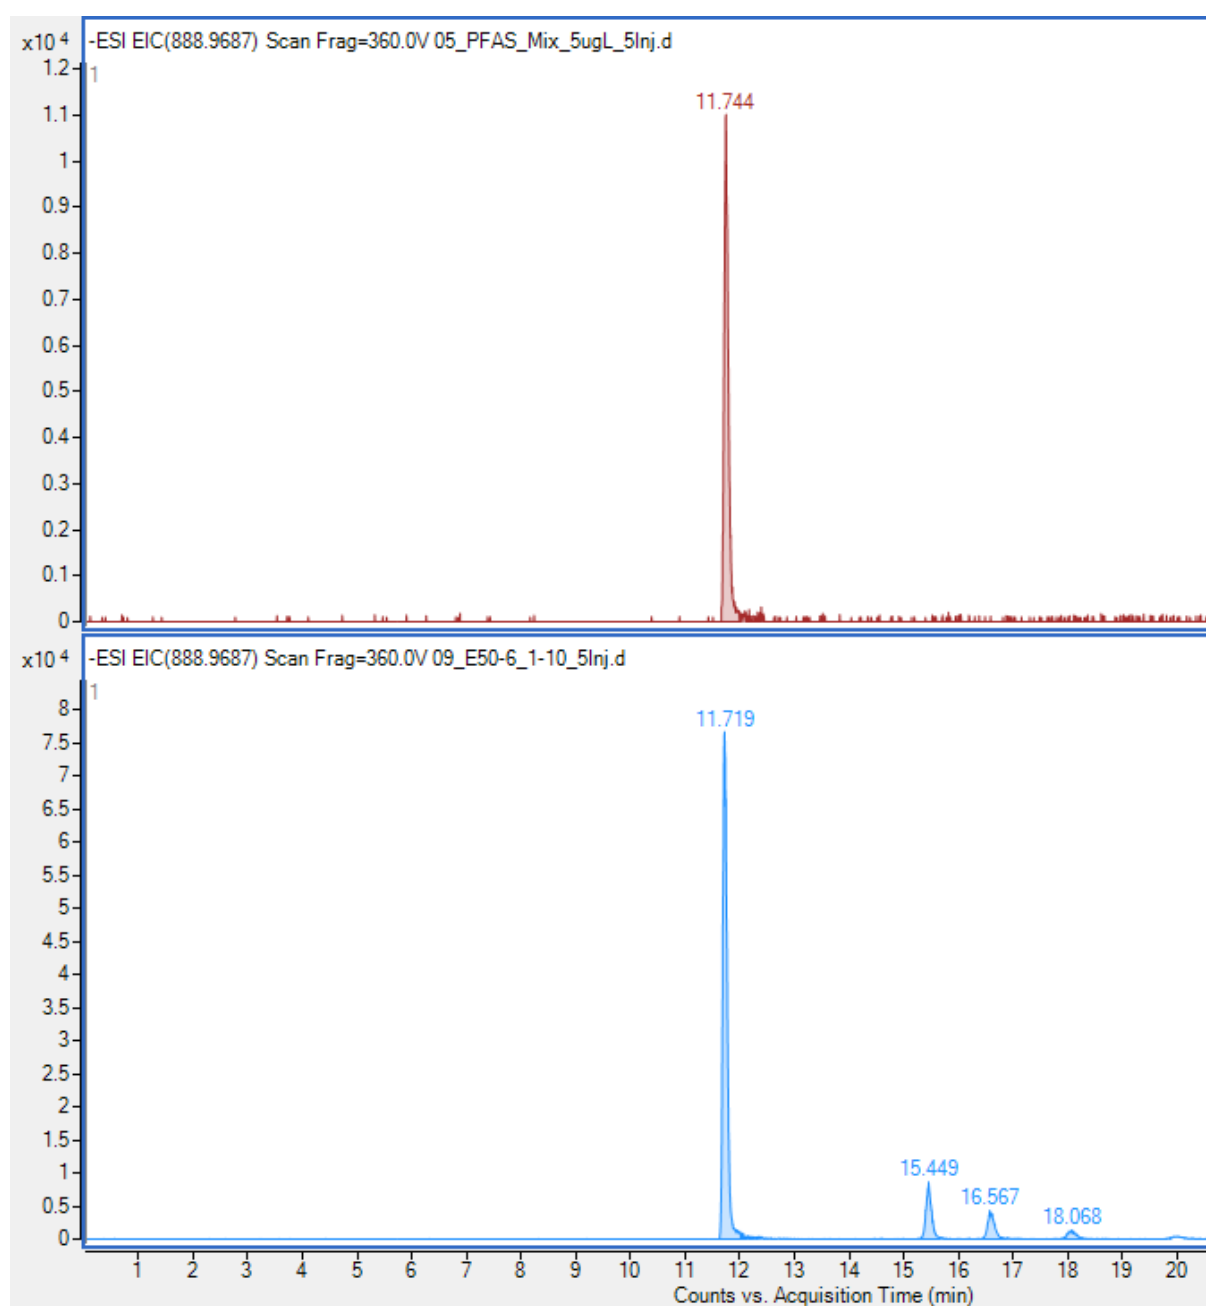

**Fig. S1.36** Top: EIC of 6:2 / 8:2 diPAP standard 5  $\mu\text{g/L}$ , bottom: 1/10 dilution of sample 4

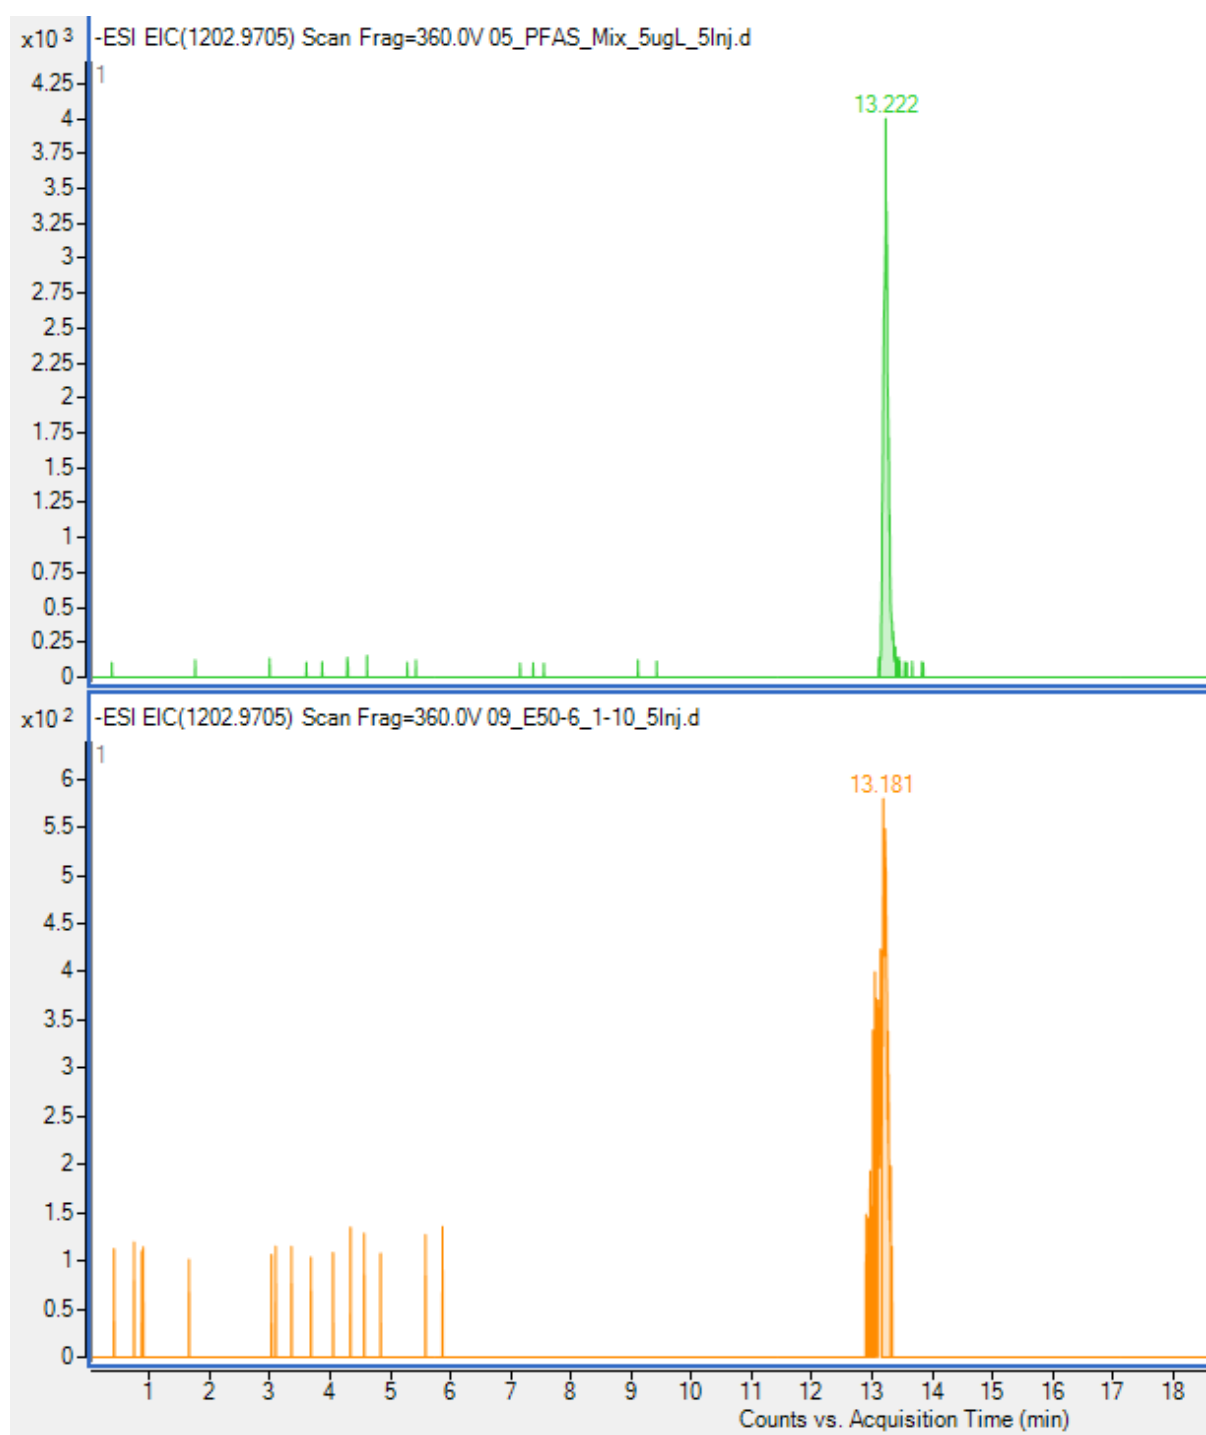

**Fig. S1.37** Top: EIC of diSAMPAP standard 5  $\mu\text{g/L}$ , bottom: 1/10 dilution of sample 4

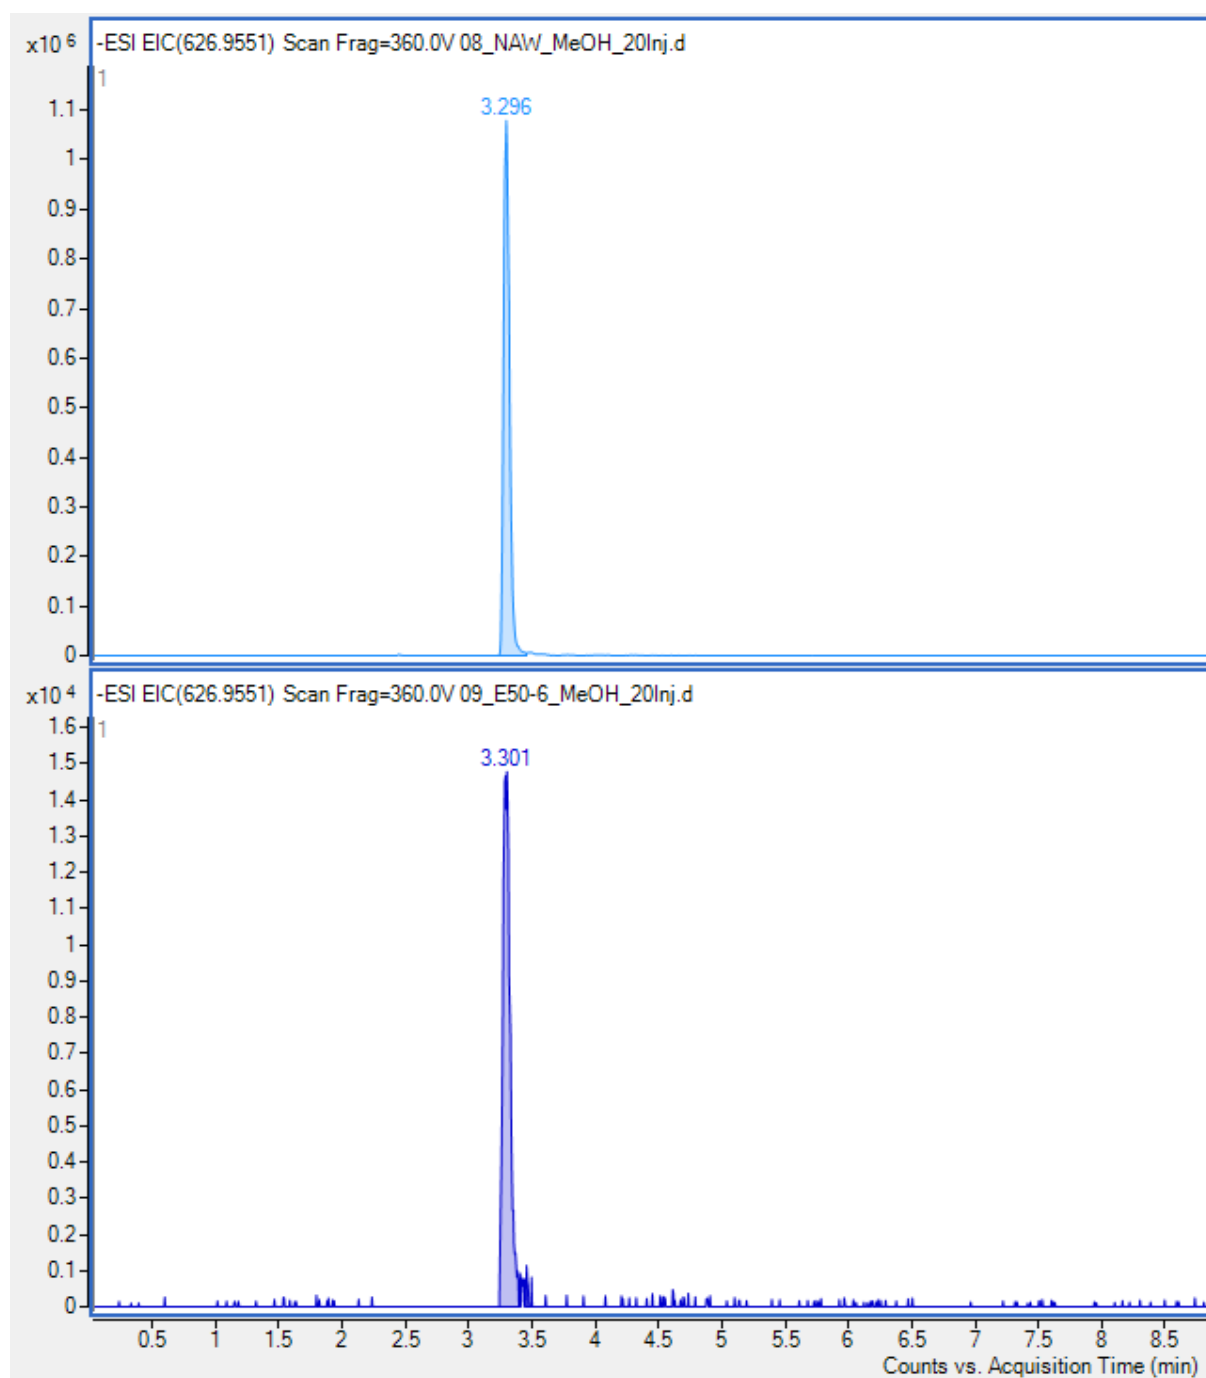

**Fig. S1.38** 10:2 FTSA RT match with sample 2. Top: Sample 2; bottom: Sample 4

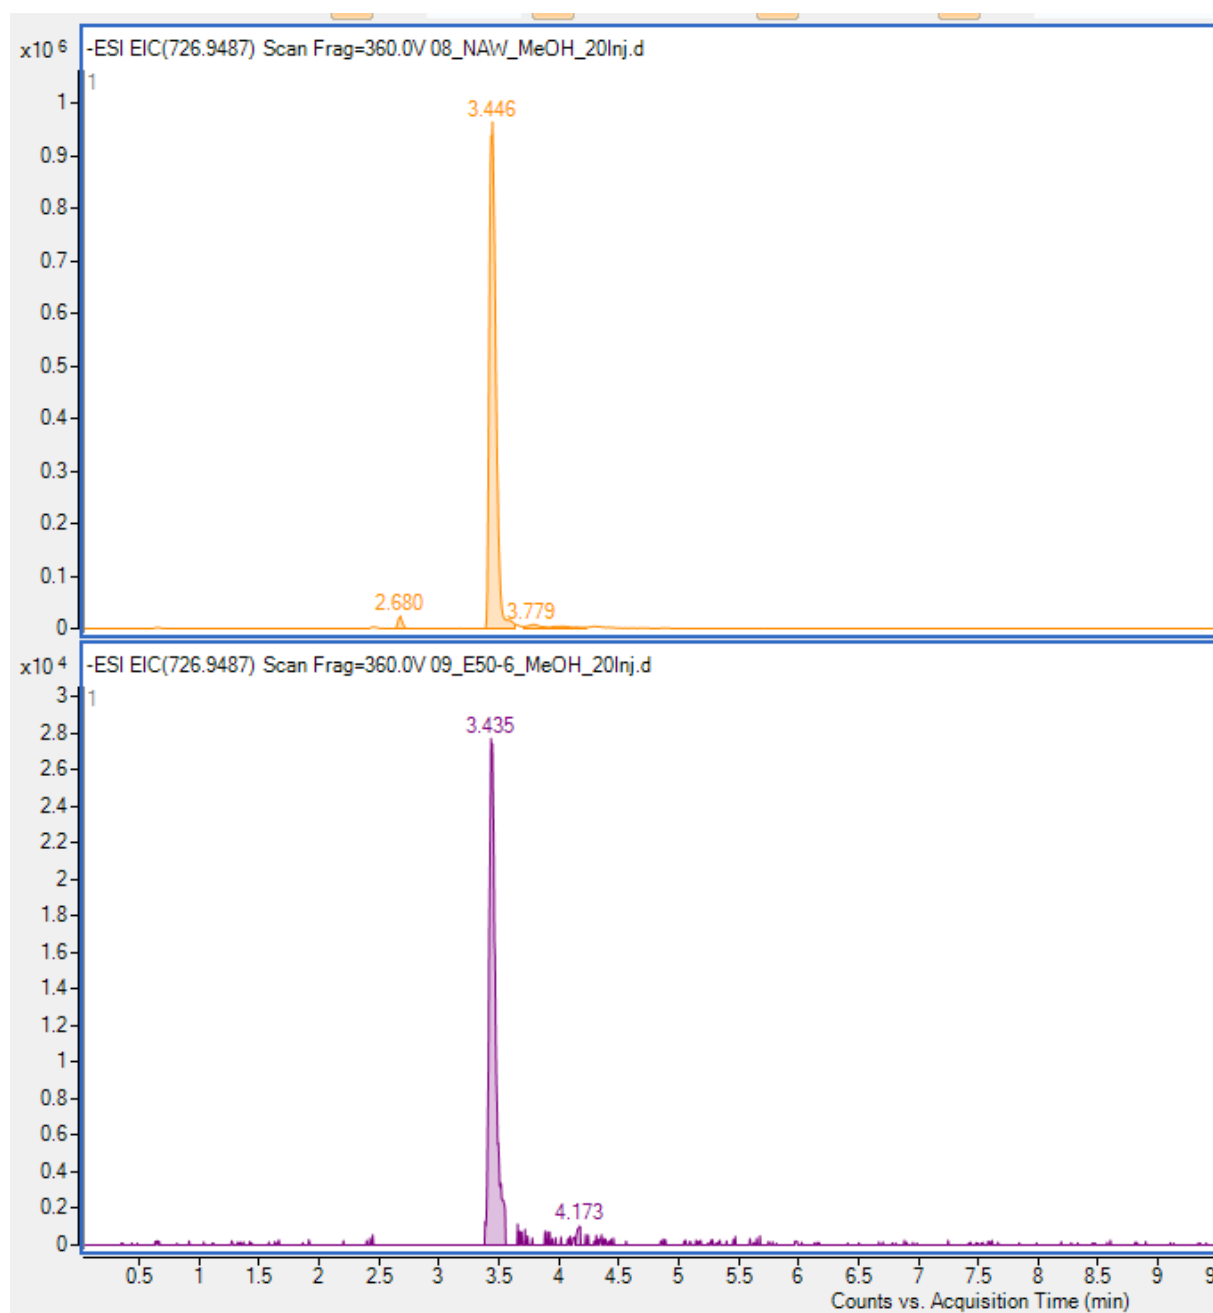

**Fig. S1.39** 12:2 FTSA RT match with sample 2. Top: Sample 2; bottom: Sample 4

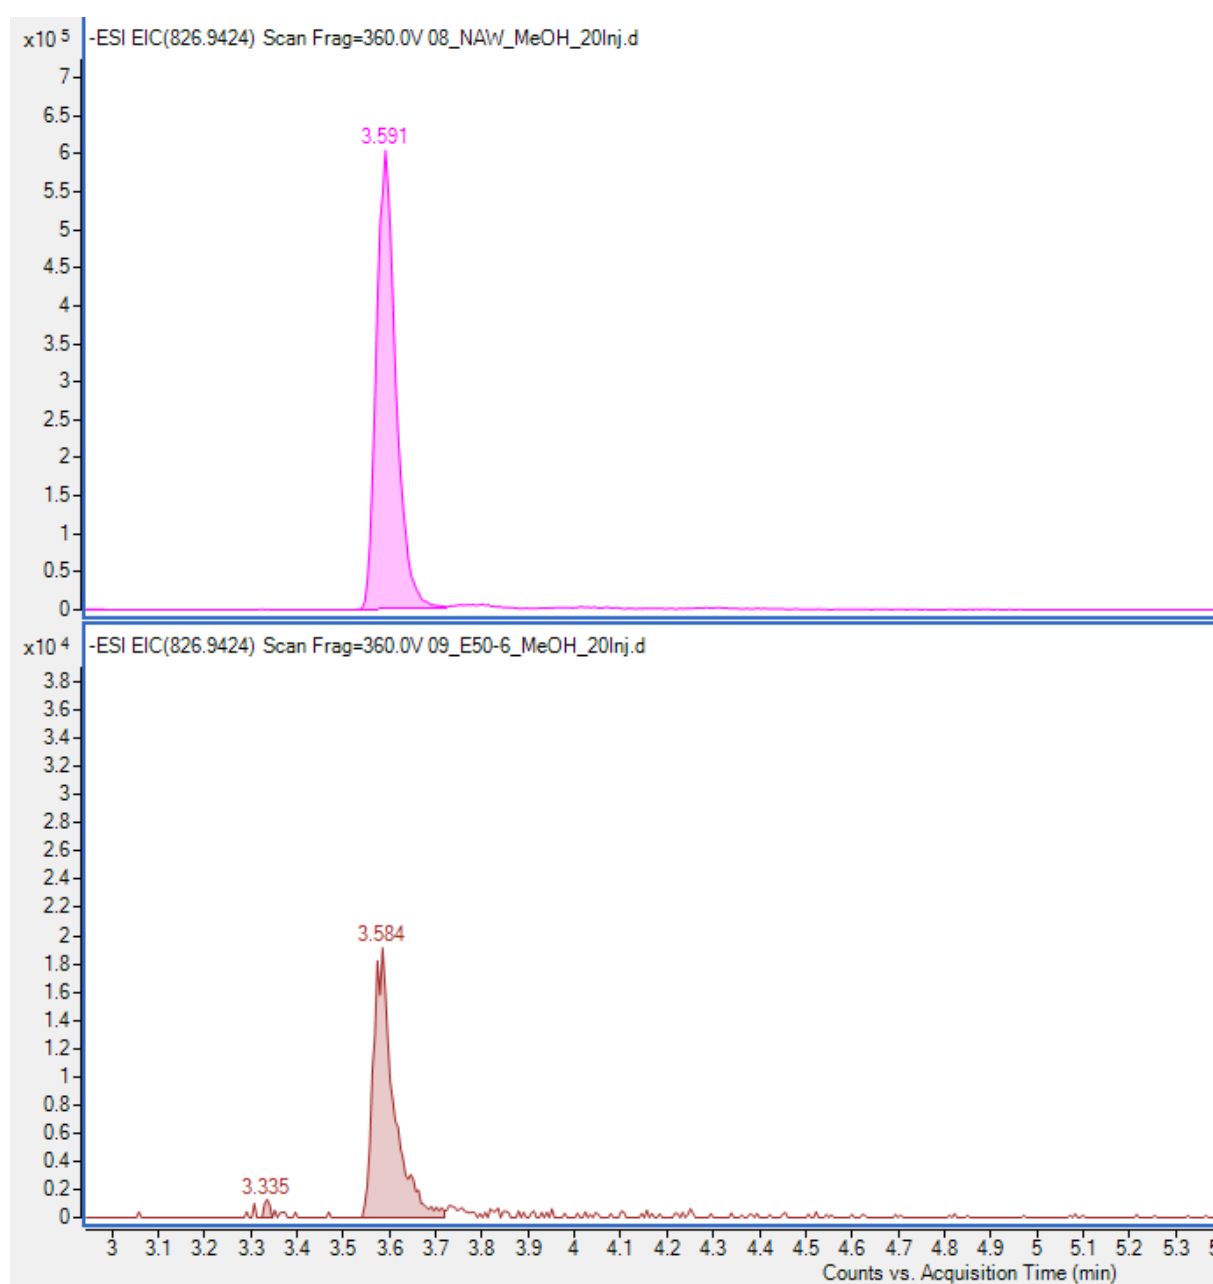

**Fig. S1.40** 14:2 FTSA RT match with sample 2. Top: Sample 2; bottom: Sample 4

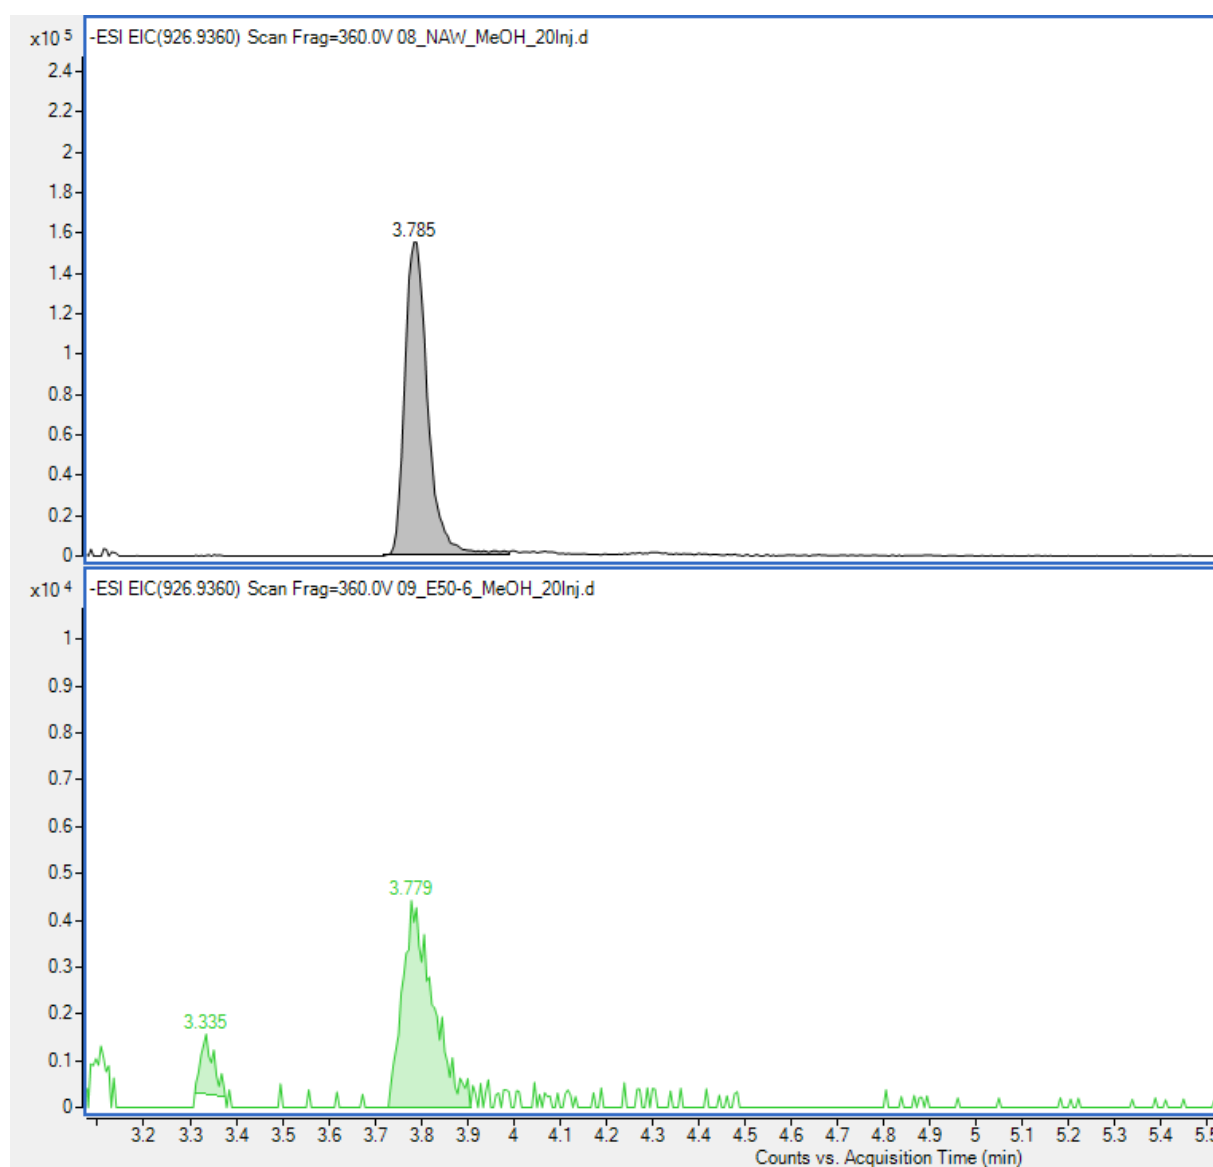

**Fig. S1.41** 16:2 FTSA RT match with sample 2. Top: Sample 2; bottom: Sample 4

## Targeted MS/MS measurements

These measurements were performed on an Agilent 1260 LC coupled to an Agilent 6490 QqQ instrument with following instrumental parameters: Gas temperature: 150 °C, gas flow: 12 L/min, Nebulizer: 45 psi, SheathGasHeater: 380, SheathGasFlow: 12, Capillary: 3000 V, VCharging: 0. The same column was chosen as described in the main method, the temperature was set to 35 °C. 5  $\mu$ L of the sample were injected. The eluents were chosen as in the main method. The gradient profile started with 15% B, followed by a linear change to 100% B within 10 min, kept isocratic for another 5 min.

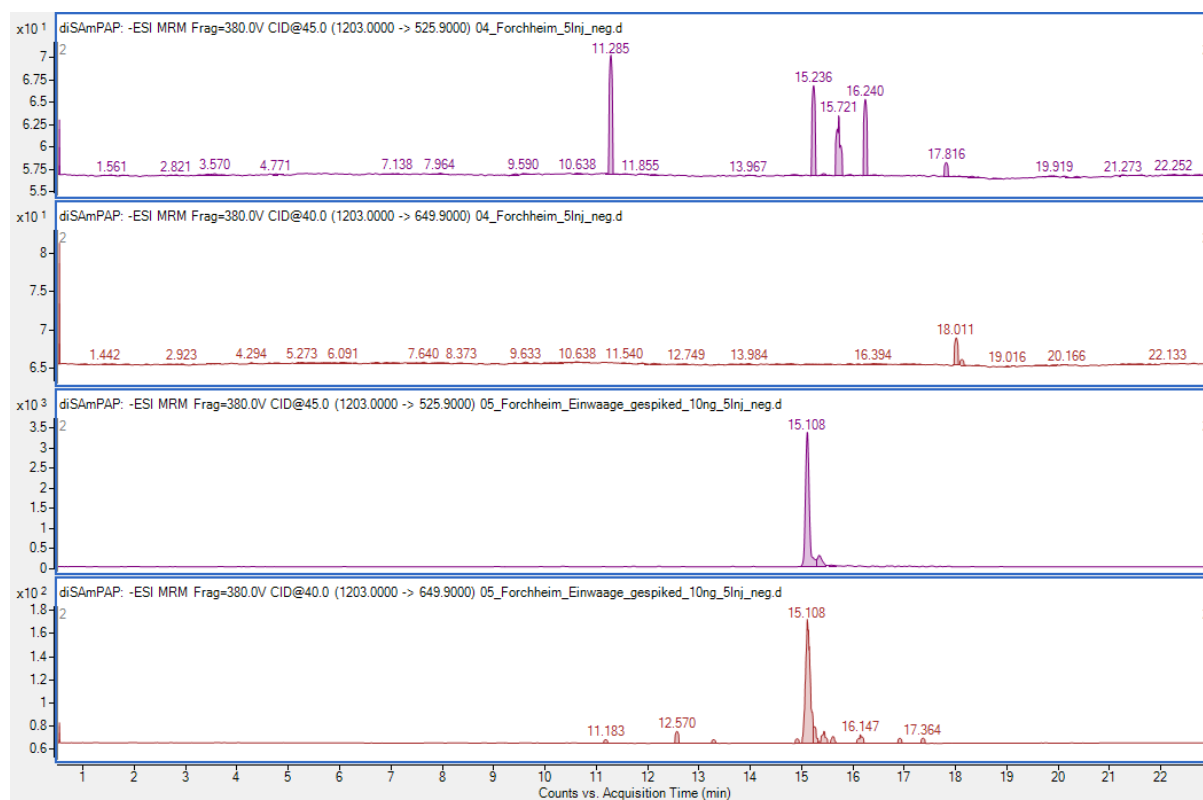

**Fig. S1.42** diSAmPAP (1203 -> 525.9, purple; 1203 -> 649.9, red). Top two chromatograms: uncontaminated soil sample, bottom 2 chromatograms: spiked uncontaminated soil sample

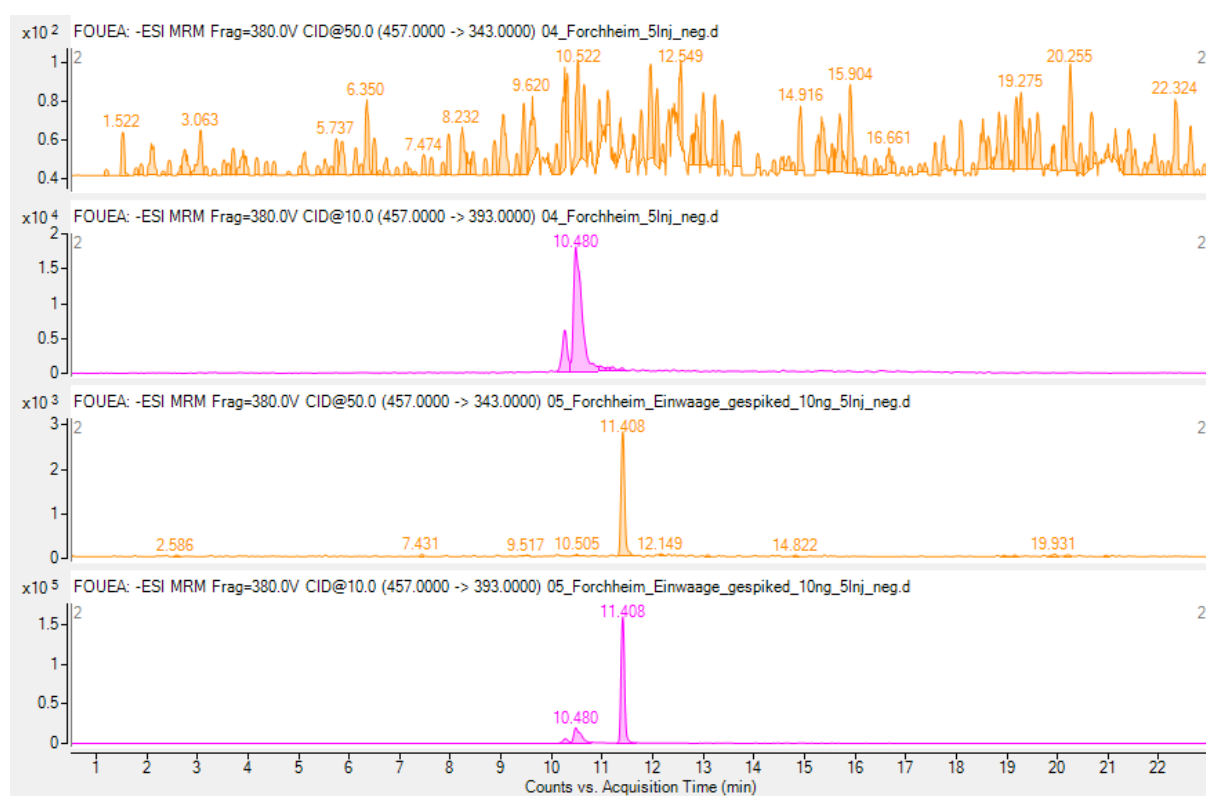

**Fig. S1.43** 8:2 PFCA (457 → 343, orange; 457 → 393, pink). Top two chromatograms: uncontaminated soil sample, bottom 2 chromatograms: spiked uncontaminated soil sample

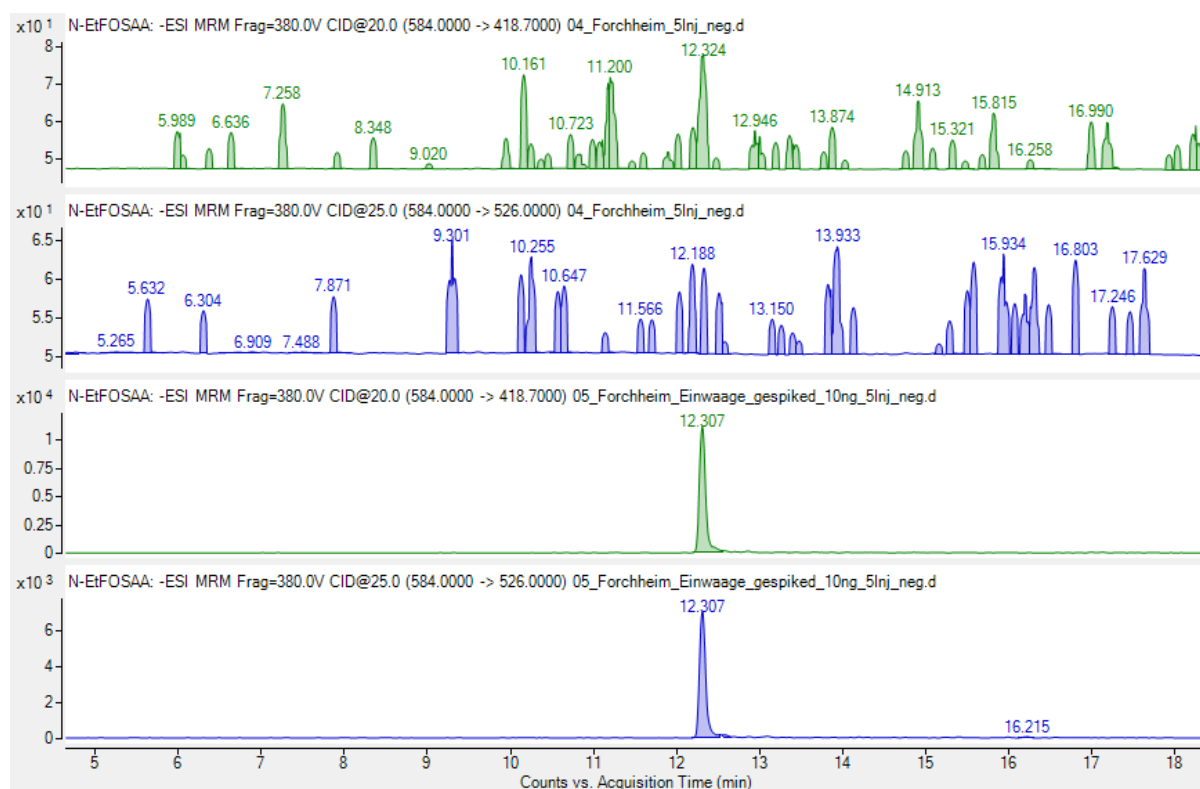

**Fig. S1.44** EtFOSAA (584 -> 418.7, green; 584 -> 526, blue). Top two chromatograms: uncontaminated soil sample, bottom 2 chromatograms: spiked uncontaminated soil sample

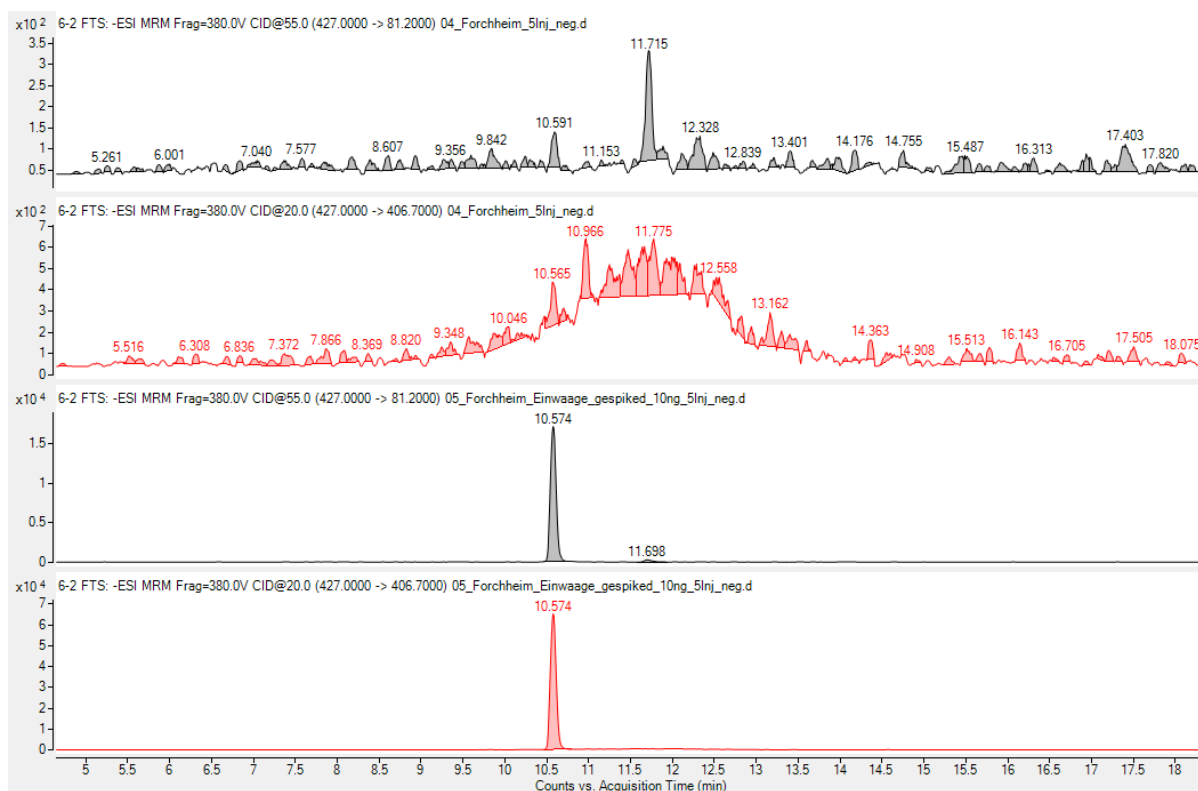

**Fig. S1.45** 6:2 FTS (427 -> 81.2, black; 427 -> 406.7, red). Top two chromatograms: uncontaminated soil sample, bottom 2 chromatograms: spiked uncontaminated soil sample

Confirmation of the identification with an authentic standard for samples 2, 3, and 4

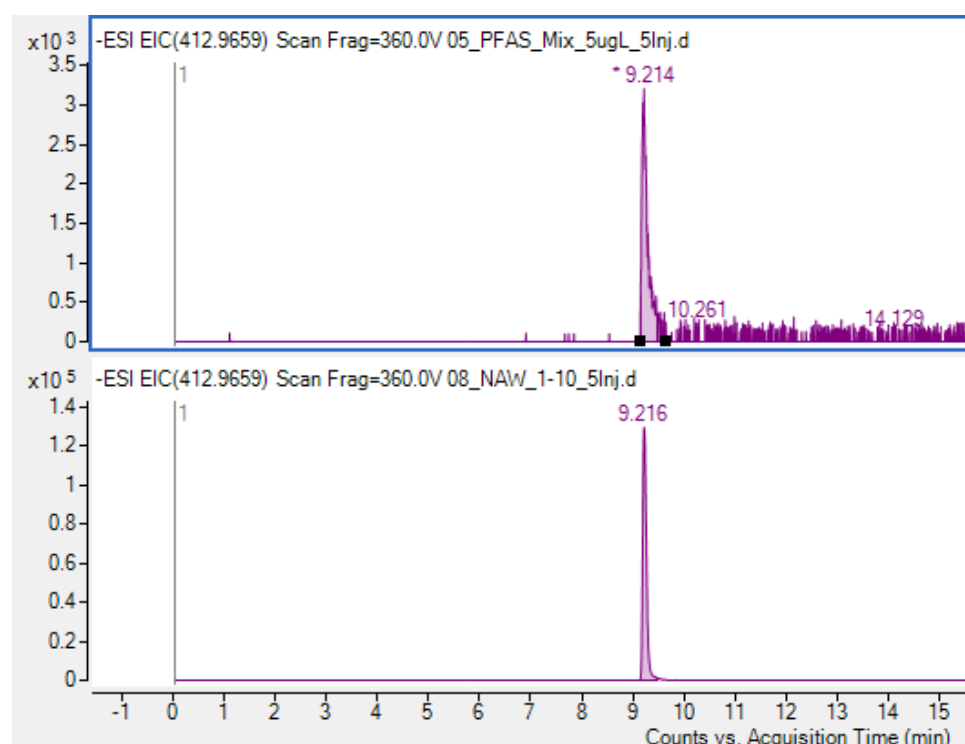

**Fig. S1.46** Top: EIC of PFOA standard 5µg/L, bottom: 1/10 dilution of sample 2

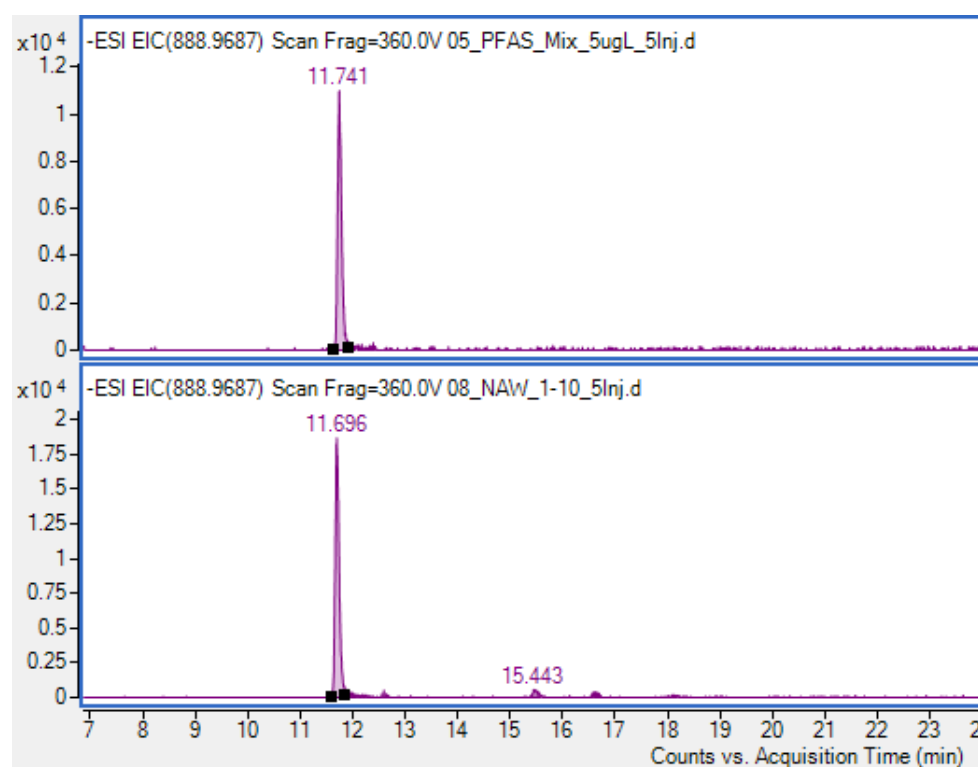

**Fig. S1.47** Top: EIC of 6:2/8:2 diPAP standard 5µg/L, bottom: 1/10 dilution of sample 2

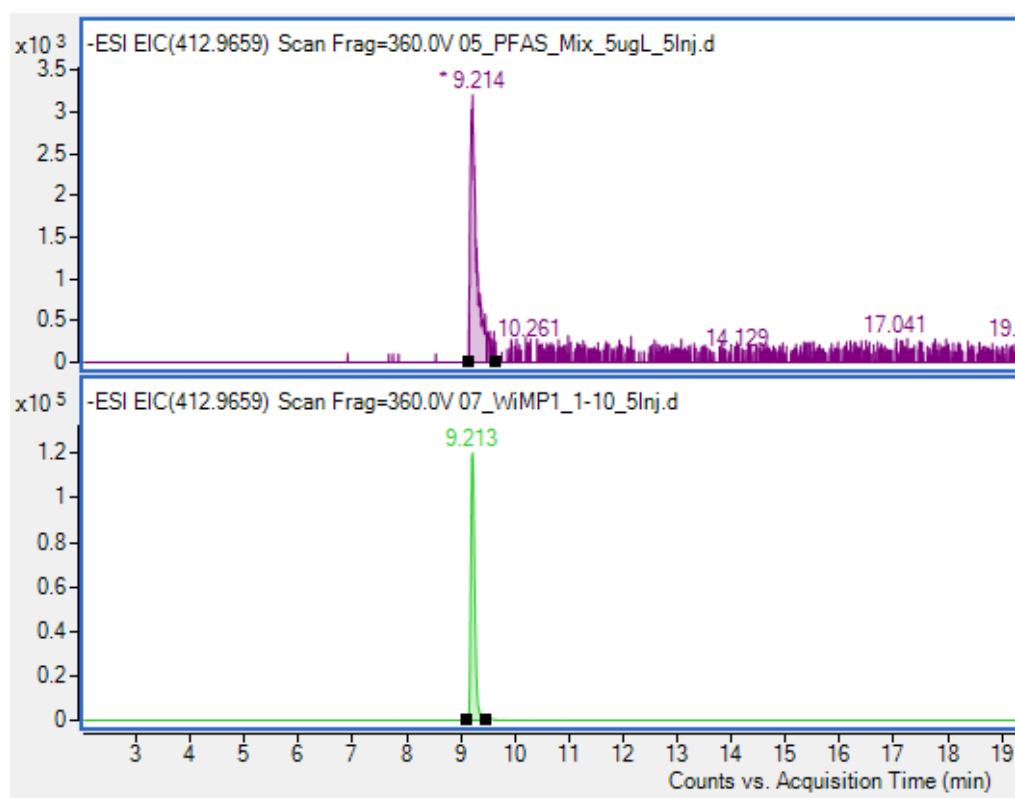

**Fig. S1.48** EIC of PFOA standard 5  $\mu\text{g/L}$ , bottom: 1/10 dilution of sample 3

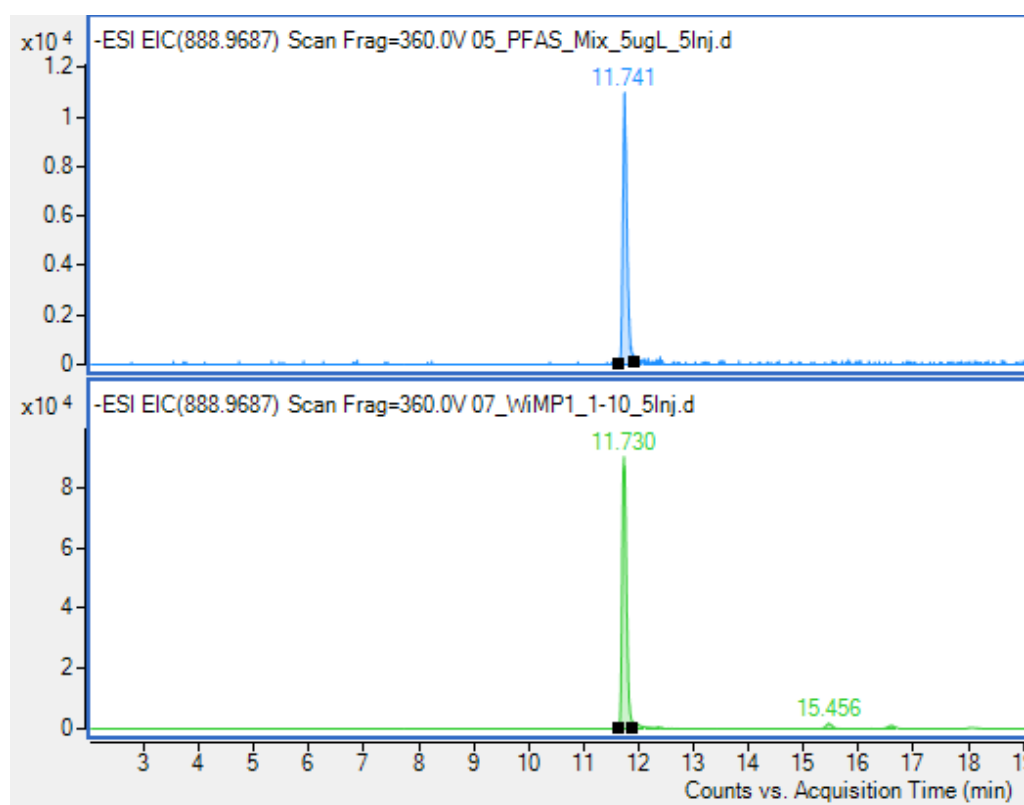

**Fig. S1.49** EIC of 6:2/8:2 diPAP standard 5  $\mu\text{g/L}$ , bottom: 1/10 dilution of sample 3

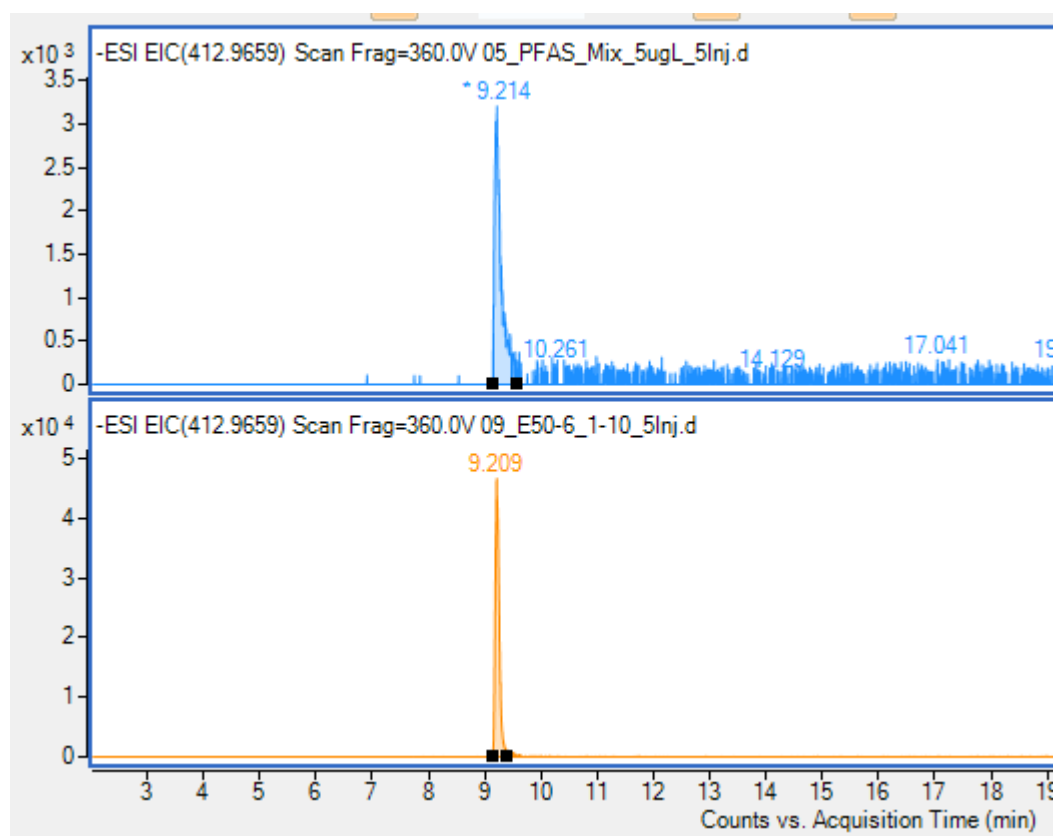

**Fig. S1.50** Top: EIC of PFOA standard 5 µg/L, bottom: 1/10 dilution of sample 4

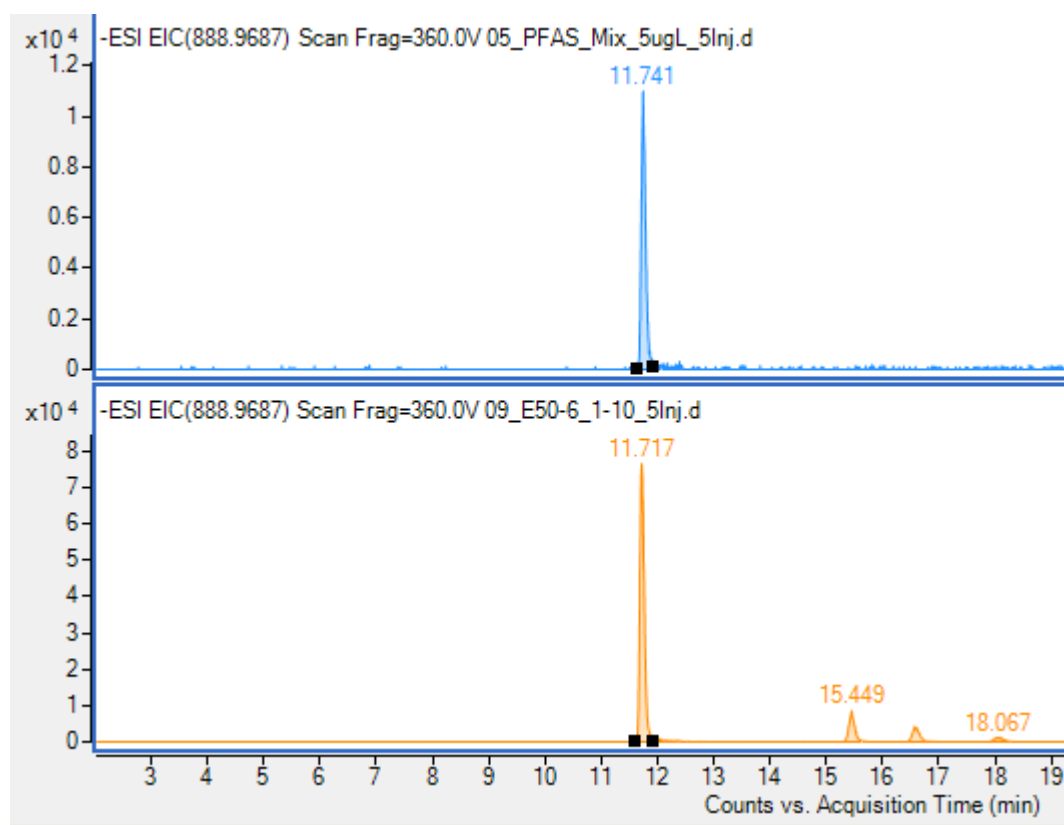

**Fig. S1.51** Top: EIC of 6:2/8:2 diPAP standard 5 µg/L, bottom: 1/10 dilution of sample 4
