# Supplementary material for: LC-MS screening of poly- and perfluoroalkyl substances in contaminated soil by Kendrick mass analysis
Source: Anal Bioanal Chem. 2020 Jan 9;412(20):4797–805. doi: 10.1007/s00216-019-02358-0 (PMC7334281; doi:10.1007/s00216-019-02358-0)
Supplement: Supplementary file 2 — (XLSX 156 kb) [file 216_2019_2358_MOESM2_ESM.xlsx]

## Sheet: Table S1
Filename: C:\Users\Boris\Desktop\07_Huegelsheim_MeOH_20Inj.xls, compared with: OECD_PFAS_curated_Nikiforos Alygizakis.xls, mass of repeating unit [Da]: 49.9968, Tolerance [Da]: 0.005
HS 1 Mass	499.973	549.972
HS 1 RT	3.396	3.447
HS 1 CAS		67969-65-7
Presence in List?	0	1
HS 2 Mass		1150.75	1150.75	1100.76
HS 2 RT	4.523	5.779	5.905	5.349
HS 2 CAS
Presence in List?	0	0	0	0
HS 3 Mass	1150.81	1200.8	1150.81	1150.81
HS 3 RT	9.32	11.528	9.621	9.986
HS 3 CAS
Presence in List?	0	0	0	0
HS 4 Mass	750.916	850.91	900.907	800.913	850.91	1050.9	1100.9	1150.89	1200.89	1250.89	1300.88	750.916
HS 4 RT	2.774	2.798	2.936	2.833	2.888	3.42	3.452	3.488	3.522	3.552	3.581	2.651
HS 4 CAS			40143-79-1	610800-34-5							63225-54-7
Presence in List?	0	0	1	1	0	0	0	0	0	0	1	0
HS 5 Mass	700.936	650.942
HS 5 RT	3.164	3.455
HS 5 CAS
Presence in List?	0	0
HS 6 Mass	300.98	850.945	250.987	1000.94	1050.94
HS 6 RT	0.7	3.366	1.26	3.612	3.666
HS 6 CAS
Presence in List?	0	0	0	0	0
HS 7 Mass	650.995	750.988	850.98	1250.96
HS 7 RT	3.333	3.507	3.698	5.322
HS 7 CAS
Presence in List?	0	0	0	0
HS 8 Mass	151.04	950.99
HS 8 RT	1.64	2.851
HS 8 CAS
Presence in List?	0	0
HS 9 Mass	301.062	751.03
HS 9 RT	3.077	3.348
HS 9 CAS	131294-67-2
Presence in List?	1	0
HS 10 Mass	401.899	1151.85
HS 10 RT	0.678	4.7
HS 10 CAS
Presence in List?	0	0
HS 11 Mass	901.934	501.955
HS 11 RT	0.659	3.35
HS 11 CAS
Presence in List?	0	0
HS 12 Mass	1152.81	1102.81	1102.81
HS 12 RT	6.075	8.058	8.743
HS 12 CAS
Presence in List?	0	0	0
HS 13 Mass	1202.82	1152.82	1152.82
HS 13 RT	7.445	11.56	12.029
HS 13 CAS
Presence in List?	0	0	0
HS 14 Mass	852.926	1002.92	902.923	952.92	1152.91	1252.9
HS 14 RT	3.266	3.37	3.305	3.336	4.058	4.236
HS 14 CAS
Presence in List?	0	0	0	0	0	0
HS 15 Mass	1302.94	1352.93	1252.94	1302.94
HS 15 RT	3.28	3.37	4.839	3.37
HS 15 CAS
Presence in List?	0	0	0	0
HS 16 Mass	153.031	952.975	1002.98
HS 16 RT	1.501	3.068	3.546
HS 16 CAS		1233312-87-2
Presence in List?	0	1	0
HS 17 Mass	1002.98	952.981	1052.98	1152.97	1302.96	1102.98	1202.97
HS 17 RT	3.071	3.453	3.56	3.704	3.958	3.622	3.777
HS 17 CAS	67939-92-8					67939-93-9	2965-52-8
Presence in List?	1	0	0	0	0	1	1
HS 18 Mass	553.055	303.066
HS 18 RT	3.278	4.051
HS 18 CAS
Presence in List?	0	0
HS 19 Mass	403.837	1203.78
HS 19 RT	3.899	6.075
HS 19 CAS
Presence in List?	0	0
HS 20 Mass	1003.81	1253.79
HS 20 RT	4.931	8.941
HS 20 CAS
Presence in List?	0	0
HS 21 Mass	353.922	653.9	903.884
HS 21 RT	0.659	2.975	7.01
HS 21 CAS
Presence in List?	0	0	0
HS 22 Mass	1053.93	1103.93
HS 22 RT	3.145	3.19
HS 22 CAS
Presence in List?	0	0
HS 23 Mass	154.063	254.058
HS 23 RT	2.882	3.688
HS 23 CAS
Presence in List?	0	0
HS 24 Mass	1104.75	1054.75
HS 24 RT	3.421	3.554
HS 24 CAS
Presence in List?	0	0
HS 25 Mass	1204.75	904.765
HS 25 RT	3.411	4.903
HS 25 CAS
Presence in List?	0	0
HS 26 Mass	954.869	904.868
HS 26 RT	4.935	8.939
HS 26 CAS
Presence in List?	0	0
HS 27 Mass	1004.88	1354.86
HS 27 RT	3.041	3.573
HS 27 CAS
Presence in List?	0	0
HS 28 Mass	954.899	1004.89	1054.89	1104.89	1154.88
HS 28 RT	3.426	3.46	3.504	3.537	3.565
HS 28 CAS
Presence in List?	0	0	0	0	0
HS 29 Mass	904.938	604.955
HS 29 RT	3.647	3.45
HS 29 CAS
Presence in List?	0	0
HS 30 Mass	1204.95	1154.95	904.963	1304.94	1104.95	1304.94
HS 30 RT	3.342	3.308	3.434	3.663	3.7	4.151
HS 30 CAS
Presence in List?	0	0	0	0	0	0
HS 31 Mass	1304.97	1354.97
HS 31 RT	3.906	3.984
HS 31 CAS
Presence in List?	0	0
HS 32 Mass	255.066	655.04	255.067
HS 32 RT	3.335	3.938	3.434
HS 32 CAS
Presence in List?	0	0	0
HS 33 Mass	905.046	255.092
HS 33 RT	3.145	3.423
HS 33 CAS
Presence in List?	0	0
HS 34 Mass	555.952	1055.92
HS 34 RT	3.091	3.244
HS 34 CAS	2806-24-8
Presence in List?	1	0
HS 35 Mass	705.986	1255.96
HS 35 RT	3.283	4.85
HS 35 CAS
Presence in List?	0	0
HS 36 Mass	1006.82	1206.81	1206.81
HS 36 RT	4.736	8.034	8.93
HS 36 CAS
Presence in List?	0	0	0
HS 37 Mass	1156.87	706.895
HS 37 RT	0.67	3.403
HS 37 CAS
Presence in List?	0	0
HS 38 Mass	556.921	756.903	806.901
HS 38 RT	3.501	2.72	2.816
HS 38 CAS
Presence in List?	0	0	0
HS 39 Mass	756.925	806.921	856.917
HS 39 RT	3.262	3.305	3.335
HS 39 CAS			61097-98-1
Presence in List?	0	0	1
HS 40 Mass	556.966	606.962	456.968	1056.93	656.96	756.954	856.947
HS 40 RT	3.243	3.33	4.251	4.333	3.397	3.548	3.725
HS 40 CAS	70887-94-4		147874-76-8 70887-84-2
Presence in List?	1	0	2	0	0	0	0
HS 41 Mass	1256.93	206.997
HS 41 RT	4.026	5.325
HS 41 CAS
Presence in List?	0	0
HS 42 Mass	606.998	1056.97	1106.96	1156.96
HS 42 RT	3.126	3.427	3.448	3.504
HS 42 CAS	918-32-1 755-53-3
Presence in List?	2	0	0	0
HS 43 Mass	756.997	707.001	757.001
HS 43 RT	3.297	3.754	4.049
HS 43 CAS
Presence in List?	0	0	0
HS 44 Mass	807.479	607.489
HS 44 RT	3.386	7.81
HS 44 CAS
Presence in List?	0	0
HS 45 Mass	907.912	1007.9
HS 45 RT	3.395	3.511
HS 45 CAS
Presence in List?	0	0
HS 46 Mass	108.022	907.969
HS 46 RT	2.036	3.314
HS 46 CAS
Presence in List?	0	0
HS 47 Mass	208.076	708.048
HS 47 RT	2.552	3.063
HS 47 CAS
Presence in List?	0	0
HS 48 Mass	908.827	1108.82
HS 48 RT	7.007	7.24
HS 48 CAS
Presence in List?	0	0
HS 49 Mass	658.945	1258.9
HS 49 RT	3.236	9.755
HS 49 CAS
Presence in List?	0	0
HS 50 Mass	158.979	1208.92	758.945	458.966	1258.91
HS 50 RT	0.597	3.269	3.325	3.924	3.308
HS 50 CAS
Presence in List?	0	0	0	0	0
HS 51 Mass	908.943	1008.94	108.996	108.996	108.996	1008.94
HS 51 RT	2.843	2.845	3.946	5.323	8.664	3.049
HS 51 CAS
Presence in List?	0	0	0	0	0	0
HS 52 Mass	608.978	1358.93
HS 52 RT	3.549	4.147
HS 52 CAS
Presence in List?	0	0
HS 53 Mass	658.995	858.981	908.978	808.986
HS 53 RT	3.73	4.439	4.611	4.172
HS 53 CAS
Presence in List?	0	0	0	0
HS 54 Mass	1208.99	159.057
HS 54 RT	3.81	1.984
HS 54 CAS
Presence in List?	0	0
HS 55 Mass	659.036	209.061	909.015
HS 55 RT	0.686	2.887	3.369
HS 55 CAS
Presence in List?	0	0	0
HS 56 Mass	309.077	259.077	1059.03	309.077
HS 56 RT	3.046	3.367	3.395	3.168
HS 56 CAS	80284-42-0			80284-42-0
Presence in List?	1	0	0	1
HS 57 Mass	1109.05	1209.04	1259.04	1309.03	1359.03
HS 57 RT	4.143	4.451	4.637	4.836	5.09
HS 57 CAS
Presence in List?	0	0	0	0	0
HS 58 Mass	1059.86	1259.86	1059.86
HS 58 RT	5.087	8.467	5.473
HS 58 CAS
Presence in List?	0	0	0
HS 59 Mass	259.934	1109.88	259.934
HS 59 RT	0.623	5.685	0.728
HS 59 CAS
Presence in List?	0	0	0
HS 60 Mass	209.949	559.929
HS 60 RT	0.662	3.039
HS 60 CAS
Presence in List?	0	0
HS 61 Mass	1109.95	1159.95
HS 61 RT	3.179	3.244
HS 61 CAS
Presence in List?	0	0
HS 62 Mass	1060.76	1110.76	1060.76
HS 62 RT	5.917	6.471	6.289
HS 62 CAS
Presence in List?	0	0	0
HS 63 Mass	1110.78	1160.77
HS 63 RT	8.463	9.023
HS 63 CAS
Presence in List?	0	0
HS 64 Mass	460.933	360.936	1160.89
HS 64 RT	2.827	3.44	3.556
HS 64 CAS	646-83-3 1135682-88-0	2106-55-0	13140-24-4
Presence in List?	2	1	1
HS 65 Mass	910.908	560.931	1010.9	1060.9
HS 65 RT	3.464	3.503	3.53	5.743
HS 65 CAS
Presence in List?	0	0	0	0
HS 66 Mass	1310.9	1210.91	1360.9	1310.91
HS 66 RT	3.567	3.577	3.719	3.681
HS 66 CAS
Presence in List?	0	0	0	0
HS 67 Mass	260.991	1010.94
HS 67 RT	3.011	3.422
HS 67 CAS	679-53-8
Presence in List?	1	0
HS 68 Mass	1110.96	1210.95	1260.95	1160.95
HS 68 RT	3.701	3.84	3.905	3.756
HS 68 CAS
Presence in List?	0	0	0	0
HS 69 Mass	211.061	561.035	661.032	761.025
HS 69 RT	1.727	3.237	3.426	3.609
HS 69 CAS		93706-76-4 58671-32-2
Presence in List?	0	2	0	0
HS 70 Mass	211.076	1311.01
HS 70 RT	3.277	5.73
HS 70 CAS
Presence in List?	0	0
HS 71 Mass	511.075	261.092
HS 71 RT	3.479	3.633
HS 71 CAS	34455-22-6
Presence in List?	1	0
HS 72 Mass	1111.76	1161.76	1111.76
HS 72 RT	6.263	7.508	6.704
HS 72 CAS
Presence in List?	0	0	0
HS 73 Mass	361.827	1061.78	961.791
HS 73 RT	3.584	4.653	5.063
HS 73 CAS
Presence in List?	0	0	0
HS 74 Mass	1011.81	861.81
HS 74 RT	4.296	4.4
HS 74 CAS
Presence in List?	0	0
HS 75 Mass	1261.85	1211.85
HS 75 RT	3.541	7.986
HS 75 CAS
Presence in List?	0	0
HS 76 Mass	1111.87	1211.87
HS 76 RT	2.996	4.825
HS 76 CAS
Presence in List?	0	0
HS 77 Mass	961.917	1011.91	1061.91	1011.91	1111.91	1161.9
HS 77 RT	3.137	3.161	3.209	3.243	3.264	3.333
HS 77 CAS
Presence in List?	0	0	0	0	0	0
HS 78 Mass	262.087	1312.02
HS 78 RT	3.068	5.505
HS 78 CAS
Presence in List?	0	0
HS 79 Mass	962.873	1262.85
HS 79 RT	4.387	8.491
HS 79 CAS
Presence in List?	0	0
HS 80 Mass	912.902	962.9
HS 80 RT	3.603	3.667
HS 80 CAS
Presence in List?	0	0
HS 81 Mass	712.934	762.931	812.927
HS 81 RT	3.31	3.343	3.386
HS 81 CAS
Presence in List?	0	0	0
HS 82 Mass	212.979	262.976	312.973	412.966	362.97	512.96	512.96	562.957	612.953	662.95	312.971	712.947	762.944	812.941	862.936	912.934	962.93	1012.93	462.964	562.958
HS 82 RT	1.686	2.162	2.47	2.609	2.686	2.909	3.093	3.191	3.284	3.353	3.357	3.42	3.497	3.564	3.659	3.743	3.876	4.003	2.988	3.05
HS 82 CAS	375-22-4 335-10-4	2706-90-3	307-24-4	335-67-1 15166-06-0 1610931-27-5 1812247-20-3 1882109-58-1 1882109-59-2 1882109-60-5 1882109-61-6 1882109-62-7 1882109-63-8 1882109-64-9 1882109-65-0 1882109-66-1 1882109-67-2 1882109-68-3 1882109-69-4 1882109-70-7 1882109-71-8 1882109-72-9 1882109-73-0 1882109-74-1 1882109-75-2 1882109-76-3 1882109-77-4 1882109-78-5 1882109-79-6 1882109-80-9 1882109-81-0 35605-76-6 207678-51-1 705240-04-6 909009…	375-85-9 15899-29-3 922168-41-0 19108-37-3	335-76-2 172155-07-6 19547-30-9	335-76-2 172155-07-6 19547-30-9	2058-94-8 16486-94-5	307-55-1	16486-96-7 72629-94-8 217824-95-8	307-24-4	376-06-7	18024-09-4 141074-63-7	67905-19-5 141977-66-4	57475-95-3	16517-11-6	133921-38-7	68310-12-3	375-95-1 15899-31-7	2058-94-8 16486-94-5
Presence in List?	2	1	1	40	4	3	3	2	1	3	1	1	2	2	1	1	1	1	2	2
HS 83 Mass	1062.94	1112.93	1162.93	1362.92
HS 83 RT	3.446	3.504	3.534	4.424
HS 83 CAS
Presence in List?	0	0	0	0
HS 84 Mass	213.033	912.983	1262.96
HS 84 RT	3.044	3.525	5.491
HS 84 CAS
Presence in List?	0	0	0
HS 85 Mass	163.04	1012.99
HS 85 RT	1.209	2.858
HS 85 CAS
Presence in List?	0	0
HS 86 Mass	813.018	663.028	913.011	1013	1113	363.04
HS 86 RT	3.869	3.939	4.16	4.547	4.693	2.647
HS 86 CAS
Presence in List?	0	0	0	0	0	0
HS 87 Mass	413.902	1063.86	1063.86
HS 87 RT	3.499	4.687	4.77
HS 87 CAS
Presence in List?	0	0	0
HS 88 Mass	363.961	413.962
HS 88 RT	2.988	3.042
HS 88 CAS
Presence in List?	0	0
HS 89 Mass	863.943	563.958
HS 89 RT	3.302	3.329
HS 89 CAS
Presence in List?	0	0
HS 90 Mass	1163.94	1013.94	263.999	263.999
HS 90 RT	3.197	3.419	3.427	3.553
HS 90 CAS
Presence in List?	0	0	0	0
HS 91 Mass	1164.82	1164.82	214.881
HS 91 RT	11.08	11.523	0.626
HS 91 CAS
Presence in List?	0	0	0
HS 92 Mass	714.884	1014.86	1114.86	1214.85
HS 92 RT	3.404	3.549	3.705	3.909
HS 92 CAS
Presence in List?	0	0	0	0
HS 93 Mass	664.897	814.886	864.885
HS 93 RT	3.263	3.518	3.546
HS 93 CAS
Presence in List?	0	0	0
HS 94 Mass	514.916	1114.88	1164.87	1214.87	764.899	964.89	964.889
HS 94 RT	2.946	3.16	3.195	3.215	3.451	4.915	8.912
HS 94 CAS
Presence in List?	0	0	0	0	0	0	0
HS 95 Mass	1214.91	1264.9	1314.9	1314.9	1364.9
HS 95 RT	3.699	3.74	3.84	4.139	4.218
HS 95 CAS
Presence in List?	0	0	0	0	0
HS 96 Mass	114.989	814.944	1064.92
HS 96 RT	0.598	3.442	3.557
HS 96 CAS
Presence in List?	0	0	0
HS 97 Mass	265.003	165.005
HS 97 RT	1.706	4.284
HS 97 CAS
Presence in List?	0	0
HS 98 Mass	515.008	365.015
HS 98 RT	2.738	3.334
HS 98 CAS
Presence in List?	0	0
HS 99 Mass	115.076	815.028	1364.99	1015.02
HS 99 RT	1.972	3.083	3.956	3.996
HS 99 CAS
Presence in List?	0	0	0	0
HS 100 Mass	815.088	1365.06
HS 100 RT	3.179	5.905
HS 100 CAS
Presence in List?	0	0
HS 101 Mass	515.811	1165.77
HS 101 RT	0.651	6.158
HS 101 CAS
Presence in List?	0	0
HS 102 Mass	1015.84	1215.83	1015.84
HS 102 RT	5.002	7.441	5.698
HS 102 CAS
Presence in List?	0	0	0
HS 103 Mass	1165.85	1215.85
HS 103 RT	6.126	9.13
HS 103 CAS
Presence in List?	0	0
HS 104 Mass	616.009	416.022
HS 104 RT	3.455	4.513
HS 104 CAS
Presence in List?	0	0
HS 105 Mass	616.803	1066.77	1066.77
HS 105 RT	3.9	4.597	4.697
HS 105 CAS
Presence in List?	0	0	0
HS 106 Mass	366.902	216.909
HS 106 RT	3.546	13.022
HS 106 CAS
Presence in List?	0	0
HS 107 Mass	766.912	866.905	866.905	916.902	966.899	1016.9	1166.89	1316.88	1216.88	1266.88	1366.87
HS 107 RT	2.807	2.814	2.921	2.967	3.013	3.043	3.513	3.612	3.542	3.572	3.659
HS 107 CAS
Presence in List?	0	0	0	0	0	0	0	0	0	0	0
HS 108 Mass	1066.93	1116.93	1166.92	1216.92	866.941	1016.93	916.939	966.935	466.967
HS 108 RT	3.698	3.751	3.832	3.897	3.397	3.509	3.425	3.453	5.82
HS 108 CAS
Presence in List?	0	0	0	0	0	0	0	0	0
HS 109 Mass	816.957	1266.93	216.99	316.983	516.97	1366.92
HS 109 RT	0.654	4.173	2.831	3.143	3.508	4.518
HS 109 CAS				153817-18-6
Presence in List?	0	0	0	1	0	0
HS 110 Mass	716.985	766.977
HS 110 RT	3.34	3.356
HS 110 CAS
Presence in List?	0	0
HS 111 Mass	417.016	1266.96
HS 111 RT	3.081	4.841
HS 111 CAS	17527-29-6 48076-44-4 1401315-55-6
Presence in List?	3	0
HS 112 Mass	167.071	1217	1317	217.066
HS 112 RT	3.556	5.928	6.936	3.199
HS 112 CAS
Presence in List?	0	0	0	0
HS 113 Mass	267.082	317.075	417.072
HS 113 RT	3.523	6.113	13.085
HS 113 CAS
Presence in List?	0	0	0
HS 114 Mass	517.071	667.061	517.071	267.087	367.082
HS 114 RT	0.607	3.441	0.774	1.751	3.907
HS 114 CAS
Presence in List?	0	0	0	0	0
HS 115 Mass	417.86	1017.82
HS 115 RT	3.978	4.733
HS 115 CAS
Presence in List?	0	0
HS 116 Mass	417.955	1117.92
HS 116 RT	3.338	5.701
HS 116 CAS
Presence in List?	0	0
HS 117 Mass	1218.77	868.795	718.802	868.795
HS 117 RT	4.422	6.294	0.646	3.958
HS 117 CAS
Presence in List?	0	0	0	0
HS 118 Mass	1268.81	1218.81	1218.81	1168.82	1168.82
HS 118 RT	3.426	8.115	8.374	7.242	7.452
HS 118 CAS
Presence in List?	0	0	0	0	0
HS 119 Mass	868.922	918.917	968.914	1018.91	1068.91	1118.9	868.919	1318.89
HS 119 RT	3.282	3.324	3.356	3.387	3.417	3.45	3.377	4.422
HS 119 CAS
Presence in List?	0	0	0	0	0	0	0	0
HS 120 Mass	168.99	218.986	268.983	318.98	368.977	418.973	468.97	268.983	518.967	368.976	568.964	618.96	668.957	718.954	768.951	818.947	868.943	918.94	968.937	168.989	168.989	418.974
HS 120 RT	0.734	2.163	2.47	2.685	2.849	2.989	3.096	3.099	3.197	3.278	3.282	3.354	3.423	3.494	3.563	3.657	3.747	3.873	4.004	1.686	2.842	2.793
HS 120 CAS		375-17-7	375-61-1	355-37-3 1998-67-0 30320-28-6	375-83-7	335-65-9	375-94-0	375-61-1	375-97-3	375-83-7		66563-68-6	423-66-5	66577-33-1								335-65-9
Presence in List?	0	1	1	3	1	1	1	1	1	1	0	1	1	1	0	0	0	0	0	0	0	1
HS 121 Mass	918.954	1268.93	318.989
HS 121 RT	3.514	4.517	0.706
HS 121 CAS			6866-58-6
Presence in List?	0	0	1
HS 122 Mass	1218.95	968.96
HS 122 RT	3.764	3.729
HS 122 CAS
Presence in List?	0	0
HS 123 Mass	918.985	1268.96	219.027
HS 123 RT	2.852	3.881	0.737
HS 123 CAS
Presence in List?	0	0	0
HS 124 Mass	669.01	968.986	1318.97
HS 124 RT	0.763	2.853	3.372
HS 124 CAS
Presence in List?	0	0	0
HS 125 Mass	219.066	469.046	1318.99
HS 125 RT	2.036	4.536	5.673
HS 125 CAS
Presence in List?	0	0	0
HS 126 Mass	519.849	1119.81
HS 126 RT	0.762	4.665
HS 126 CAS
Presence in List?	0	0
HS 127 Mass	619.854	1219.81
HS 127 RT	3.331	7.818
HS 127 CAS
Presence in List?	0	0
HS 128 Mass	1119.86	1319.85
HS 128 RT	5.503	12.301
HS 128 CAS
Presence in List?	0	0
HS 129 Mass	1069.92	1119.92
HS 129 RT	3.079	5.492
HS 129 CAS
Presence in List?	0	0
HS 130 Mass	970.875	1120.87
HS 130 RT	4.434	5.317
HS 130 CAS
Presence in List?	0	0
HS 131 Mass	570.918	1170.88	1220.88	1270.87	1070.89	1120.88
HS 131 RT	3.088	3.584	3.642	3.687	3.523	3.555
HS 131 CAS
Presence in List?	0	0	0	0	0	0
HS 132 Mass	720.943	770.939	770.939	1070.92	1120.92
HS 132 RT	3.159	3.176	3.043	3.874	3.954
HS 132 CAS
Presence in List?	0	0	0	0	0
HS 133 Mass	970.945	620.965	770.956	620.966
HS 133 RT	3.052	3.232	3.353	3.477
HS 133 CAS
Presence in List?	0	0	0	0
HS 134 Mass	720.966	1370.93
HS 134 RT	3.639	3.701
HS 134 CAS
Presence in List?	0	0
HS 135 Mass	221.012	670.98	471.001	1170.95	1370.94
HS 135 RT	2.589	3.299	2.814	4.164	4.924
HS 135 CAS
Presence in List?	0	0	0	0	0
HS 136 Mass	871.001	970.995	1070.99	1070.99	771.005
HS 136 RT	3.871	4.178	4.575	4.776	3.645
HS 136 CAS					129838-41-1
Presence in List?	0	0	0	0	1
HS 137 Mass	471.067	1371.01	1371.01
HS 137 RT	0.775	4.928	5.9
HS 137 CAS
Presence in List?	0	0	0
HS 138 Mass	1171.76	1221.75
HS 138 RT	6.954	5.836
HS 138 CAS
Presence in List?	0	0
HS 139 Mass	321.888	971.846
HS 139 RT	3.628	4.125
HS 139 CAS
Presence in List?	0	0
HS 140 Mass	1071.89	1321.87	1271.87
HS 140 RT	0.669	3.568	8.456
HS 140 CAS
Presence in List?	0	0	0
HS 141 Mass	1271.88	1071.9
HS 141 RT	3.476	5.728
HS 141 CAS
Presence in List?	0	0
HS 142 Mass	571.966	771.952	921.939
HS 142 RT	3.373	3.939	3.977
HS 142 CAS
Presence in List?	0	0	0
HS 143 Mass	272.014	1271.95	671.989
HS 143 RT	2.2	4.513	3.55
HS 143 CAS	26649-23-0
Presence in List?	1	0	0
HS 144 Mass	1321.97	1371.97
HS 144 RT	3.948	4.031
HS 144 CAS
Presence in List?	0	0
HS 145 Mass	822.038	922.032
HS 145 RT	3.729	4.006
HS 145 CAS
Presence in List?	0	0
HS 146 Mass	1172.77	1172.77	822.789
HS 146 RT	8.467	8.764	4.32
HS 146 CAS
Presence in List?	0	0	0
HS 147 Mass	1222.81	572.852
HS 147 RT	3.429	3.908
HS 147 CAS
Presence in List?	0	0
HS 148 Mass	122.894	372.875
HS 148 RT	0.629	0.65
HS 148 CAS
Presence in List?	0	0
HS 149 Mass	322.917	922.879
HS 149 RT	0.63	4.303
HS 149 CAS	99324-96-6 1513-88-8 59665-23-5
Presence in List?	3	0
HS 150 Mass	822.895	872.891	872.892
HS 150 RT	2.831	2.885	2.779
HS 150 CAS
Presence in List?	0	0	0
HS 151 Mass	772.919	822.916	872.912	922.909	222.952
HS 151 RT	3.28	3.323	3.358	3.388	0.674
HS 151 CAS
Presence in List?	0	0	0	0	0
HS 152 Mass	422.967	522.959	622.953	472.963	472.96
HS 152 RT	3.487	3.499	3.633	3.835	5.818
HS 152 CAS			306-91-2	93393-77-2
Presence in List?	0	0	1	1	0
HS 153 Mass	822.974	472.996	472.995	1172.95	1222.95
HS 153 RT	0.67	3.032	3.145	3.531	3.552
HS 153 CAS
Presence in List?	0	0	0	0	0
HS 154 Mass	273.053	373.045	973.005	1122.99	1123
HS 154 RT	3.379	4.003	2.844	2.953	4.122
HS 154 CAS
Presence in List?	0	0	0	0	0
HS 155 Mass	273.092	1173.04
HS 155 RT	3.432	4.772
HS 155 CAS
Presence in List?	0	0
HS 156 Mass	973.793	1273.77
HS 156 RT	5.013	7.567
HS 156 CAS
Presence in List?	0	0
HS 157 Mass	423.872	1273.82
HS 157 RT	0.639	3.366
HS 157 CAS
Presence in List?	0	0
HS 158 Mass	923.92	1073.91	423.951
HS 158 RT	0.669	3.251	3.358
HS 158 CAS
Presence in List?	0	0	0
HS 159 Mass	1223.92	1173.93
HS 159 RT	5.511	7.946
HS 159 CAS
Presence in List?	0	0
HS 160 Mass	224.002	773.964
HS 160 RT	1.445	3.63
HS 160 CAS
Presence in List?	0	0
HS 161 Mass	124.016	1273.94
HS 161 RT	1.905	3.656
HS 161 CAS
Presence in List?	0	0
HS 162 Mass	1273.97	1373.96
HS 162 RT	3.247	3.373
HS 162 CAS
Presence in List?	0	0
HS 163 Mass	974.757	824.77
HS 163 RT	3.942	3.949
HS 163 CAS
Presence in List?	0	0
HS 164 Mass	724.859	624.868
HS 164 RT	3.23	3.311
HS 164 CAS
Presence in List?	0	0
HS 165 Mass	574.957	624.953	674.95	874.937	74.9907	74.9905	74.9906
HS 165 RT	3.257	3.338	3.407	3.732	3.944	5.324	6.12
HS 165 CAS	330562-42-0		39187-47-8
Presence in List?	1	0	1	0	0	0	0
HS 166 Mass	1174.94	1374.92	774.957
HS 166 RT	3.676	3.927	3.042
HS 166 CAS
Presence in List?	0	0	0
HS 167 Mass	1124.96	874.976	924.973	574.996	624.993	774.984	824.98	674.99
HS 167 RT	3.198	4.074	4.246	3.369	3.45	3.764	3.912	3.551
HS 167 CAS		94158-68-6	54009-79-9 96497-21-1	38565-54-7	47795-34-6	94158-67-5	54009-77-7	94158-66-4
Presence in List?	0	1	2	1	1	1	1	1
HS 168 Mass	275.031	375.02	275.031
HS 168 RT	2.421	2.961	2.535
HS 168 CAS	97745-82-9 1137162-24-3 785-93-3		97745-82-9 1137162-24-3 785-93-3
Presence in List?	3	0	3
HS 169 Mass	975.004	1075
HS 169 RT	3.922	4.237
HS 169 CAS
Presence in List?	0	0
HS 170 Mass	375.088	1275.03	375.087
HS 170 RT	4.121	7.021	5.026
HS 170 CAS
Presence in List?	0	0	0
HS 171 Mass	525.84	975.807
HS 171 RT	0.648	5.729
HS 171 CAS
Presence in List?	0	0
HS 172 Mass	1125.87	225.928	1275.86
HS 172 RT	4.908	0.656	10.514
HS 172 CAS
Presence in List?	0	0	0
HS 173 Mass	276.034	875.993	925.991	975.986
HS 173 RT	1.921	3.027	3.089	3.158
HS 173 CAS
Presence in List?	0	0	0	0
HS 174 Mass	1126.77	1176.77	1176.77	1176.77
HS 174 RT	5.588	5.929	6.084	7.051
HS 174 CAS
Presence in List?	0	0	0	0
HS 175 Mass	1126.79	1076.79	1076.79
HS 175 RT	5.904	7.791	8.459
HS 175 CAS
Presence in List?	0	0	0
HS 176 Mass	1026.9	1076.9
HS 176 RT	3.554	5.715
HS 176 CAS
Presence in List?	0	0
HS 177 Mass	1176.92	1326.9	1376.9
HS 177 RT	3.26	3.704	3.742
HS 177 CAS
Presence in List?	0	0	0
HS 178 Mass	1226.95	1276.94	1376.94	726.975
HS 178 RT	3.878	3.95	4.125	3.338
HS 178 CAS
Presence in List?	0	0	0	0
HS 179 Mass	277.075	377.066
HS 179 RT	2.401	2.601
HS 179 CAS
Presence in List?	0	0
HS 180 Mass	627.807	1127.77
HS 180 RT	0.656	7.754
HS 180 CAS
Presence in List?	0	0
HS 181 Mass	1377.97	1177.98	1277.98	1377.97
HS 181 RT	3.664	4.175	4.507	4.962
HS 181 CAS
Presence in List?	0	0	0	0
HS 182 Mass	1128.79	1178.78	928.795
HS 182 RT	6.167	7.233	4.105
HS 182 CAS
Presence in List?	0	0	0
HS 183 Mass	1028.89	978.893
HS 183 RT	3.744	3.692
HS 183 CAS
Presence in List?	0	0
HS 184 Mass	728.929	828.923	878.919	778.928	728.929	1378.89
HS 184 RT	3.335	3.398	3.431	3.363	3.53	3.521
HS 184 CAS		34761-47-2
Presence in List?	0	1	0	0	0	0
HS 185 Mass	1028.94	1078.93	1128.93	1178.92	1228.92	1278.92
HS 185 RT	3.433	3.468	3.517	3.545	3.569	3.647
HS 185 CAS
Presence in List?	0	0	0	0	0	0
HS 186 Mass	928.974	1028.97
HS 186 RT	3.54	3.576
HS 186 CAS
Presence in List?	0	0
HS 187 Mass	929.074	979.071
HS 187 RT	3.15	3.175
HS 187 CAS
Presence in List?	0	0
HS 188 Mass	979.797	1179.78
HS 188 RT	5.123	7.045
HS 188 CAS
Presence in List?	0	0
HS 189 Mass	1129.95	1179.95	280.012
HS 189 RT	3.179	3.237	3.585
HS 189 CAS
Presence in List?	0	0	0
HS 190 Mass	1130.84	1130.84	780.86
HS 190 RT	10.465	11.512	3.372
HS 190 CAS
Presence in List?	0	0	0
HS 191 Mass	1230.9	780.922
HS 191 RT	3.942	3.525
HS 191 CAS
Presence in List?	0	0
HS 192 Mass	580.949	1180.91	680.943	1230.9	1330.89	1380.89
HS 192 RT	3.092	3.679	3.278	3.727	3.868	3.92
HS 192 CAS
Presence in List?	0	0	0	0	0	0
HS 193 Mass	280.983	330.98	480.97	530.967	580.963	480.97	630.96	680.955	730.95	780.95	830.947	430.974	430.974
HS 193 RT	2.331	2.527	3.169	3.252	3.339	3.369	3.407	3.476	3.55	3.649	3.732	2.829	3.052
HS 193 CAS	308-24-7 330562-43-1 391199-64-7	75180-14-2 648-39-5	14548-74-4		610778-18-2	14548-74-4						152914-73-3	152914-73-3
Presence in List?	3	2	1	0	1	1	0	0	0	0	0	1	1
HS 194 Mass	880.957	930.953
HS 194 RT	3.318	3.346
HS 194 CAS
Presence in List?	0	0
HS 195 Mass	231.023	1230.95
HS 195 RT	2.731	5.665
HS 195 CAS
Presence in List?	0	0
HS 196 Mass	731.004	181.036	181.036	181.036	181.036
HS 196 RT	3.858	3.948	4.28	4.723	7.189
HS 196 CAS
Presence in List?	0	0	0	0	0
HS 197 Mass	1280.98	1380.97	1130.99	1230.98	1080.99	1180.98
HS 197 RT	4.506	4.969	7.953	3.558	3.917	4.176
HS 197 CAS
Presence in List?	0	0	0	0	0	0
HS 198 Mass	181.067	1380.99
HS 198 RT	2.449	4
HS 198 CAS
Presence in List?	0	0
HS 199 Mass	381.908	1031.87	1031.87
HS 199 RT	3.447	5.51	6.304
HS 199 CAS
Presence in List?	0	0	0
HS 200 Mass	231.944	1381.87
HS 200 RT	0.678	3.37
HS 200 CAS
Presence in List?	0	0
HS 201 Mass	1281.97	482.023	1281.97	1281.97
HS 201 RT	3.494	8.352	4.863	5.073
HS 201 CAS
Presence in List?	0	0	0	0
HS 202 Mass	932.896	1232.88	982.894	1282.88	1332.87	1382.87
HS 202 RT	2.997	3.533	3.039	3.586	3.639	3.687
HS 202 CAS
Presence in List?	0	0	0	0	0	0
HS 203 Mass	482.935	432.938	1332.88	1382.88	1332.88	482.935
HS 203 RT	3.033	3.326	3.321	3.555	3.525	3.224
HS 203 CAS	647-29-0					647-29-0
Presence in List?	1	0	0	0	0	1
HS 204 Mass	1182.92	932.934	1082.92	1132.92	1282.91	1332.91
HS 204 RT	3.872	3.304	3.554	3.584	4.023	4.119
HS 204 CAS
Presence in List?	0	0	0	0	0	0
HS 205 Mass	182.988	1082.94
HS 205 RT	2.075	3.234
HS 205 CAS
Presence in List?	0	0
HS 206 Mass	483.005	632.994	732.986	433.006
HS 206 RT	2.725	3.386	3.556	5.506
HS 206 CAS	164796-44-5
Presence in List?	1	0	0	0
HS 207 Mass	683.001	732.996	832.99	932.984	1132.97
HS 207 RT	3.181	3.285	3.372	3.471	3.753
HS 207 CAS
Presence in List?	0	0	0	0	0
HS 208 Mass	183.045	883.001	883.001
HS 208 RT	2.902	3.432	3.544
HS 208 CAS
Presence in List?	0	0	0
HS 209 Mass	1282.99	933.006	1282.99
HS 209 RT	5.315	3.381	5.509
HS 209 CAS
Presence in List?	0	0	0
HS 210 Mass	283.061	233.061	1133	1233	1332.99
HS 210 RT	3.02	3.315	4.473	4.929	5.497
HS 210 CAS	156294-55-2
Presence in List?	1	0	0	0	0
HS 211 Mass	433.837	783.818
HS 211 RT	3.047	3.505
HS 211 CAS
Presence in List?	0	0
HS 212 Mass	583.878	1033.85
HS 212 RT	3.514	5.096
HS 212 CAS
Presence in List?	0	0
HS 213 Mass	683.907	1283.87
HS 213 RT	3.216	3.373
HS 213 CAS
Presence in List?	0	0
HS 214 Mass	1283.89	1333.89
HS 214 RT	10.518	12.223
HS 214 CAS
Presence in List?	0	0
HS 215 Mass	1133.93	233.989	1233.92
HS 215 RT	3.172	3.5	3.944
HS 215 CAS
Presence in List?	0	0	0
HS 216 Mass	583.982	633.979	583.982
HS 216 RT	3.217	3.289	3.539
HS 216 CAS	2991-50-6		2991-50-6
Presence in List?	1	0	1
HS 217 Mass	1333.97	1383.96
HS 217 RT	2.851	2.992
HS 217 CAS
Presence in List?	0	0
HS 218 Mass	1134.74	1034.75
HS 218 RT	3.427	6.045
HS 218 CAS
Presence in List?	0	0
HS 219 Mass	934.764	584.785
HS 219 RT	4.691	5.236
HS 219 CAS
Presence in List?	0	0
HS 220 Mass	1134.83	134.894	934.842
HS 220 RT	7.453	13.055	3.916
HS 220 CAS
Presence in List?	0	0	0
HS 221 Mass	984.882	1034.88	934.884
HS 221 RT	2.982	2.983	2.852
HS 221 CAS
Presence in List?	0	0	0
HS 222 Mass	684.925	734.922	784.918	1384.88	984.909	934.91	1134.9	1184.89	1084.9
HS 222 RT	2.641	2.727	2.806	3.369	3.373	3.431	3.463	3.501	3.435
HS 222 CAS
Presence in List?	0	0	0	0	0	0	0	0	0
HS 223 Mass	334.971	534.962
HS 223 RT	0.661	3.286
HS 223 CAS	54326-26-0 16500-37-1 17480-16-9
Presence in List?	3	0
HS 224 Mass	934.948	1234.93	984.945	884.948
HS 224 RT	3.54	4.846	3.576	3.5
HS 224 CAS
Presence in List?	0	0	0	0
HS 225 Mass	585.01	734.997
HS 225 RT	4.009	3.374
HS 225 CAS
Presence in List?	0	0
HS 226 Mass	135.045	1184.98	785	485.018	485.018	585.012	685.006	485.019	685.006	485.019	784.999	635.018
HS 226 RT	1.696	3.538	3.542	3.755	4.011	4.326	4.349	4.352	4.749	4.822	4.823	2.62
HS 226 CAS
Presence in List?	0	0	0	0	0	0	0	0	0	0	0	0
HS 227 Mass	385.05	1185
HS 227 RT	2.649	2.951
HS 227 CAS
Presence in List?	0	0
HS 228 Mass	585.057	1135.02	785.045	1285.01	1385.01	885.04	935.036	985.034	1085.03	1185.02
HS 228 RT	0.761	4.404	3.54	5.121	5.845	3.704	3.812	3.922	4.214	4.597
HS 228 CAS
Presence in List?	0	0	0	0	0	0	0	0	0	0
HS 229 Mass	136.017	1135.95
HS 229 RT	1.643	5.545
HS 229 CAS
Presence in List?	0	0
HS 230 Mass	386.058	1286
HS 230 RT	4.512	5.498
HS 230 CAS
Presence in List?	0	0
HS 231 Mass	1186.79	1136.79
HS 231 RT	6.07	8.46
HS 231 CAS
Presence in List?	0	0
HS 232 Mass	1236.87	1286.87	936.89	1336.86
HS 232 RT	3.668	3.708	4.427	3.747
HS 232 CAS
Presence in List?	0	0	0	0
HS 233 Mass	986.913	786.924	436.949	536.941
HS 233 RT	0.663	3.867	3.166	3.339
HS 233 CAS
Presence in List?	0	0	0	0
HS 234 Mass	786.934	636.94	886.928	936.924	1336.9	836.931	1086.92	1136.91	1086.92
HS 234 RT	3.2	3.25	3.282	3.346	3.58	3.244	3.922	4.001	6.912
HS 234 CAS								1127427-64-8
Presence in List?	0	0	0	0	0	0	0	1	0
HS 235 Mass	536.976	636.969	486.978	486.978	1386.92
HS 235 RT	3.511	3.693	3.883	4.185	3.964
HS 235 CAS
Presence in List?	0	0	0	0	0
HS 236 Mass	786.969	736.976
HS 236 RT	3.35	3.551
HS 236 CAS
Presence in List?	0	0
HS 237 Mass	137.024	586.995	786.981	886.972	1386.94
HS 237 RT	1.006	3.335	3.7	3.942	3.544
HS 237 CAS
Presence in List?	0	0	0	0	0
HS 238 Mass	1086.98	1386.96
HS 238 RT	2.996	4.087
HS 238 CAS
Presence in List?	0	0
HS 239 Mass	237.077	1187.02	237.077
HS 239 RT	0.745	4.775	1.685
HS 239 CAS
Presence in List?	0	0	0
HS 240 Mass	187.862	987.808	987.807
HS 240 RT	0.618	5.033	5.331
HS 240 CAS
Presence in List?	0	0	0
HS 241 Mass	337.929	1137.87
HS 241 RT	3.147	5.229
HS 241 CAS
Presence in List?	0	0
HS 242 Mass	437.93	937.897
HS 242 RT	3.329	8.909
HS 242 CAS
Presence in List?	0	0
HS 243 Mass	737.99	1237.96
HS 243 RT	4.014	4.192
HS 243 CAS
Presence in List?	0	0
HS 244 Mass	838.044	888.04	938.038
HS 244 RT	3.109	3.178	3.282
HS 244 CAS
Presence in List?	0	0	0
HS 245 Mass	1188.81	1138.81	1188.81
HS 245 RT	7.049	10.719	7.236
HS 245 CAS
Presence in List?	0	0	0
HS 246 Mass	838.89	888.887	888.886	938.884
HS 246 RT	2.857	2.919	2.829	2.954
HS 246 CAS
Presence in List?	0	0	0	0
HS 247 Mass	288.937	1188.88	1088.89
HS 247 RT	0.602	3.795	3.617
HS 247 CAS
Presence in List?	0	0	0
HS 248 Mass	188.952	888.907	988.9	1038.9	838.912	938.904
HS 248 RT	1.475	3.377	3.441	3.476	3.338	3.409
HS 248 CAS
Presence in List?	0	0	0	0	0	0
HS 249 Mass	188.972	1238.9	388.96	338.963
HS 249 RT	0.746	3.528	3.025	3.038
HS 249 CAS				20006-68-2
Presence in List?	0	0	0	1
HS 250 Mass	288.98	638.953	988.932	688.949	638.952
HS 250 RT	0.701	2.294	3.059	2.582	2.447
HS 250 CAS	336-08-3	87405-74-1		32687-76-6	87405-74-1
Presence in List?	1	1	0	1	1
HS 251 Mass	638.968	838.953	838.954	588.972	638.963	838.947
HS 251 RT	3.338	3.641	3.74	3.339	3.404	3.551
HS 251 CAS
Presence in List?	0	0	0	0	0	0
HS 252 Mass	688.98	1338.94	1388.93	788.974	788.975	888.968	988.962	1088.96	688.981	1188.95	688.981	1288.94	888.968	1388.94	688.98	1088.96	1188.95	888.968	788.975	788.975	988.962	888.969
HS 252 RT	3.269	3.676	3.699	6.599	3.381	3.497	3.622	3.813	3.923	4.045	4.205	4.342	4.506	4.698	5.113	5.54	6.388	6.405	4.172	4.976	5.516	5.54
HS 252 CAS			57677-99-3	57677-95-9	57677-95-9		678-41-1 678-41-1 678-41-1	78974-41-1 78974-41-1		1895-26-7		93857-55-7		57677-99-3		78974-41-1	1895-26-7		57677-95-9 57677-95-9 57677-95-9	57677-95-9	678-41-1
Presence in List?	0	0	1	1	1	0	3	2	0	1	0	1	0	1	0	1	1	0	3	1	1	0
HS 253 Mass	189.022	1188.96	1238.96
HS 253 RT	2.833	3.728	5.303
HS 253 CAS
Presence in List?	0	0	0
HS 254 Mass	689.017	1138.99
HS 254 RT	3.636	3.677
HS 254 CAS
Presence in List?	0	0
HS 255 Mass	239.06	239.06	239.06	239.06	439.043
HS 255 RT	3.691	4.724	5.319	6.113	5.79
HS 255 CAS
Presence in List?	0	0	0	0	0
HS 256 Mass	389.865	989.822
HS 256 RT	0.649	5.683
HS 256 CAS
Presence in List?	0	0
HS 257 Mass	389.937	1239.88
HS 257 RT	3.951	10.512
HS 257 CAS
Presence in List?	0	0
HS 258 Mass	190.033	889.992
HS 258 RT	2.364	3.054
HS 258 CAS
Presence in List?	0	0
HS 259 Mass	590.021	1089.99
HS 259 RT	0.678	3.176
HS 259 CAS
Presence in List?	0	0
HS 260 Mass	1140	1239.99
HS 260 RT	4.964	5.642
HS 260 CAS
Presence in List?	0	0
HS 261 Mass	440.862	990.827
HS 261 RT	0.644	5.497
HS 261 CAS
Presence in List?	0	0
HS 262 Mass	590.909	640.908
HS 262 RT	3.336	3.425
HS 262 CAS
Presence in List?	0	0
HS 263 Mass	790.918	990.906
HS 263 RT	3.867	4.972
HS 263 CAS
Presence in List?	0	0
HS 264 Mass	290.998	1240.94	790.965
HS 264 RT	2.82	4.695	3.975
HS 264 CAS
Presence in List?	0	0	0
HS 265 Mass	341	440.997	490.994	590.988	640.984	740.978	1190.95	540.991	91.0219	91.022	91.0218
HS 265 RT	2.805	3.145	3.242	3.421	3.511	3.692	3.216	3.339	3.691	3.946	7.191
HS 265 CAS	914637-49-3	3108-24-5 812-70-4	30377-52-7 34598-33-9 136022-86-1 171183-94-1		158607-41-1
Presence in List?	1	2	4	0	1	0	0	0	0	0	0
HS 266 Mass	441.04	241.051
HS 266 RT	2.948	3.189
HS 266 CAS	267648-90-8	425-21-8 883543-64-4 423-43-8
Presence in List?	1	3
HS 267 Mass	291.082	441.069	1291.02
HS 267 RT	3.787	4.331	4.643
HS 267 CAS
Presence in List?	0	0	0
HS 268 Mass	141.869	641.832
HS 268 RT	0.622	3.295
HS 268 CAS
Presence in List?	0	0
HS 269 Mass	91.957	1091.89	91.9574
HS 269 RT	3.946	4.768	4.282
HS 269 CAS
Presence in List?	0	0	0
HS 270 Mass	1141.96	391.999	841.974
HS 270 RT	3.237	3.47	3.943
HS 270 CAS		1440968-24-0
Presence in List?	0	1	0
HS 271 Mass	342.088	1392.02
HS 271 RT	1.481	5.51
HS 271 CAS
Presence in List?	0	0
HS 272 Mass	1092.79	1292.77
HS 272 RT	4.688	8.934
HS 272 CAS
Presence in List?	0	0
HS 273 Mass	1142.8	1192.8	1192.8	1142.8	1142.8
HS 273 RT	5.257	7.43	7.61	7.046	7.235
HS 273 CAS
Presence in List?	0	0	0	0	0
HS 274 Mass	742.869	892.858	642.878
HS 274 RT	3.263	3.328	3.328
HS 274 CAS
Presence in List?	0	0	0
HS 275 Mass	192.96	792.926
HS 275 RT	0.65	3.331
HS 275 CAS
Presence in List?	0	0
HS 276 Mass	1242.91	1342.9	992.921
HS 276 RT	3.283	3.701	6.993
HS 276 CAS
Presence in List?	0	0	0
HS 277 Mass	392.978	592.964	492.97	442.972	592.963	542.965	692.957	642.958	792.951	642.958	542.965	742.952	442.972	892.944	742.953	842.946	742.952	842.946
HS 277 RT	3.044	3.157	3.241	3.379	3.4	3.496	3.549	3.626	3.725	3.784	3.79	3.828	3.832	3.974	4.04	4.087	4.304	4.339
HS 277 CAS		78974-42-2	63967-43-1 37013-72-2	55009-88-6 57678-01-0 220369-95-9	78974-42-2	57678-03-2	94200-56-3	57678-05-4 563-09-7	94200-57-4	57678-05-4 563-09-7	57678-03-2	57678-07-6	55009-88-6 57678-01-0 220369-95-9	93857-42-2	57678-07-6	94200-54-1	57678-07-6	94200-54-1
Presence in List?	0	1	2	3	1	1	1	2	1	2	1	1	3	1	1	1	1	1
HS 278 Mass	392.985	542.973	442.983
HS 278 RT	2.531	3.326	2.843
HS 278 CAS
Presence in List?	0	0	0
HS 279 Mass	1142.95	1342.93	1392.93
HS 279 RT	3.543	4.08	4.172
HS 279 CAS
Presence in List?	0	0	0
HS 280 Mass	792.979	1292.95
HS 280 RT	3.138	3.992
HS 280 CAS
Presence in List?	0	0
HS 281 Mass	193.051	1142.99
HS 281 RT	1.997	4.924
HS 281 CAS
Presence in List?	0	0
HS 282 Mass	1093	243.056	243.056
HS 282 RT	2.94	4.724	5.319
HS 282 CAS
Presence in List?	0	0	0
HS 283 Mass	243.082	493.068
HS 283 RT	3.349	3.559
HS 283 CAS
Presence in List?	0	0
HS 284 Mass	1043.83	893.836
HS 284 RT	4.848	4.929
HS 284 CAS
Presence in List?	0	0
HS 285 Mass	293.914	1043.87	1043.87
HS 285 RT	0.663	5.514	5.734
HS 285 CAS
Presence in List?	0	0	0
HS 286 Mass	1293.92	1343.92
HS 286 RT	3.554	12.228
HS 286 CAS
Presence in List?	0	0
HS 287 Mass	144.046	644.01
HS 287 RT	1.931	3.42
HS 287 CAS
Presence in List?	0	0
HS 288 Mass	194.082	1294.01
HS 288 RT	3.046	5.753
HS 288 CAS
Presence in List?	0	0
HS 289 Mass	644.797	1094.77
HS 289 RT	0.661	6.696
HS 289 CAS
Presence in List?	0	0
HS 290 Mass	244.908	944.859
HS 290 RT	2.389	8.942
HS 290 CAS
Presence in List?	0	0
HS 291 Mass	844.92	894.917
HS 291 RT	3.419	3.446
HS 291 CAS
Presence in List?	0	0
HS 292 Mass	394.961	944.922
HS 292 RT	1.702	3.499
HS 292 CAS	89608-32-2 171182-86-8 118334-94-4
Presence in List?	3	0
HS 293 Mass	394.976	694.957	594.962	644.959	794.948	1044.93	1144.93	544.968	1194.92	1294.91
HS 293 RT	2.339	3.224	3.249	3.331	3.55	3.682	3.913	2.944	3.561	3.661
HS 293 CAS	13973-14-3 308-45-2							1765-48-6
Presence in List?	2	0	0	0	0	0	0	1	0	0
HS 294 Mass	195.066	245.061	245.061	1145	195.066
HS 294 RT	0.736	3.045	3.152	4.246	1.427
HS 294 CAS
Presence in List?	0	0	0	0	0
HS 295 Mass	195.812	945.76
HS 295 RT	0.653	5.05
HS 295 CAS
Presence in List?	0	0
HS 296 Mass	395.882	745.862
HS 296 RT	0.664	3.284
HS 296 CAS
Presence in List?	0	0
HS 297 Mass	295.899	1045.85	195.907
HS 297 RT	0.621	4.734	0.633
HS 297 CAS
Presence in List?	0	0	0
HS 298 Mass	1146.75	946.764
HS 298 RT	8.191	4.707
HS 298 CAS
Presence in List?	0	0
HS 299 Mass	1146.76	1096.76	1146.76
HS 299 RT	5.164	7.067	5.294
HS 299 CAS
Presence in List?	0	0	0
HS 300 Mass	646.871	546.875	446.879
HS 300 RT	3.244	3.835	0.679
HS 300 CAS
Presence in List?	0	0	0
HS 301 Mass	1146.88	346.931
HS 301 RT	5.028	3.538
HS 301 CAS		72848-57-8
Presence in List?	0	1
HS 302 Mass	996.902	796.913	846.912	896.909	96.96	796.91
HS 302 RT	3.028	3.51	3.54	3.578	13.014	3.87
HS 302 CAS
Presence in List?	0	0	0	0	0	0
HS 303 Mass	1346.89	1396.89
HS 303 RT	3.9	3.961
HS 303 CAS
Presence in List?	0	0
HS 304 Mass	546.95	646.942	696.939	746.937
HS 304 RT	3.136	3.301	3.319	3.339
HS 304 CAS
Presence in List?	0	0	0	0
HS 305 Mass	196.984	446.968	546.961	596.955	646.954	396.971	346.977	696.956	946.94
HS 305 RT	2.159	3.1	3.282	3.351	3.427	4.567	2.847	3.091	3.129
HS 305 CAS	375-02-0		317817-24-6 63967-42-0		14620-81-6	335-60-4 147492-57-7 71302-72-2 103634-36-2	2342-07-6 63967-41-9 73928-40-2
Presence in List?	1	0	2	0	1	4	3	0	0
HS 306 Mass	896.952	946.948	996.945	1296.93	1346.92	1046.94
HS 306 RT	3.336	3.371	3.401	4.234	4.367	3.43
HS 306 CAS
Presence in List?	0	0	0	0	0	0
HS 307 Mass	247.032	447.018
HS 307 RT	2.802	3.192
HS 307 CAS
Presence in List?	0	0
HS 308 Mass	147.045	1146.99	1146.99
HS 308 RT	1.861	2.96	7.876
HS 308 CAS
Presence in List?	0	0	0
HS 309 Mass	197.061	847.015	1246.99	347.049	947.008	297.047	297.047	297.047	297.047	297.047
HS 309 RT	3.119	3.44	3.797	3.988	3.565	3.69	3.947	4.289	5.318	7.189
HS 309 CAS
Presence in List?	0	0	0	0	0	0	0	0	0	0
HS 310 Mass	797.031	1297
HS 310 RT	3.049	5.704
HS 310 CAS
Presence in List?	0	0
HS 311 Mass	497.087	1397.03
HS 311 RT	2.959	5.162
HS 311 CAS
Presence in List?	0	0
HS 312 Mass	1097.84	997.843
HS 312 RT	2.979	4.38
HS 312 CAS
Presence in List?	0	0
HS 313 Mass	597.893	1047.86	1047.87
HS 313 RT	3.881	4.82	5.5
HS 313 CAS
Presence in List?	0	0	0
HS 314 Mass	597.938	497.946
HS 314 RT	3.075	3.239
HS 314 CAS		754-91-6
Presence in List?	0	1
HS 315 Mass	1097.95	1147.95	1197.94	1247.94	1297.93
HS 315 RT	3.155	3.198	3.259	3.347	3.409
HS 315 CAS
Presence in List?	0	0	0	0	0
HS 316 Mass	897.978	947.975
HS 316 RT	3.486	4.53
HS 316 CAS
Presence in List?	0	0
HS 317 Mass	1197.97	1297.97	1397.96
HS 317 RT	4.17	4.507	4.937
HS 317 CAS
Presence in List?	0	0	0
HS 318 Mass	1048.76	1098.76	1048.76	1048.76	1048.76
HS 318 RT	4.716	7.489	4.82	6.265	6.699
HS 318 CAS
Presence in List?	0	0	0	0	0
HS 319 Mass	698.86	1248.82
HS 319 RT	3.306	3.437
HS 319 CAS
Presence in List?	0	0
HS 320 Mass	348.929	948.894
HS 320 RT	3.754	4.384
HS 320 CAS
Presence in List?	0	0
HS 321 Mass	498.93	448.933	548.927	548.926	598.923	1148.89	498.93
HS 321 RT	2.779	2.844	2.892	3.046	3.17	4.937	2.965
HS 321 CAS	1763-23-1 927670-12-0	375-92-8 118334-96-6	68259-12-1	68259-12-1	335-77-3		1763-23-1 927670-12-0
Presence in List?	2	2	1	1	1	0	2
HS 322 Mass	848.92	948.915	1048.91	1248.9	898.917	1148.9	448.944	948.906
HS 322 RT	2.85	2.856	3.095	3.279	2.844	5.706	14.395	3.004
HS 322 CAS		37486-69-4
Presence in List?	0	1	0	0	0	0	0	0
HS 323 Mass	248.973	1148.91	1198.91	1248.91	248.974	1048.92	1198.91	1248.91	1298.91	1348.9	948.93
HS 323 RT	3.325	3.627	3.678	3.721	3.425	3.546	3.914	3.993	4.077	4.172	11.929
HS 323 CAS	72804-49-0 21581-82-8 376-77-2 376-87-4				72804-49-0 21581-82-8 376-77-2 376-87-4
Presence in List?	4	0	0	0	4	0	0	0	0	0	0
HS 324 Mass	998.961	149.01
HS 324 RT	3.698	4.281
HS 324 CAS
Presence in List?	0	0
HS 325 Mass	149.024	199.017	548.997
HS 325 RT	1.417	2.294	3.072
HS 325 CAS			36390-05-3
Presence in List?	0	0	1
HS 326 Mass	349.034	998.99	1198.98
HS 326 RT	3.323	4.239	5.193
HS 326 CAS	87461-68-5 83846-71-3
Presence in List?	2	0	0
HS 327 Mass	249.056	399.046
HS 327 RT	3.18	4.924
HS 327 CAS		178094-76-3 183873-55-4 183873-56-5
Presence in List?	0	3
HS 328 Mass	1299	1349
HS 328 RT	3.855	3.909
HS 328 CAS
Presence in List?	0	0
HS 329 Mass	699.055	349.073
HS 329 RT	3.768	3.781
HS 329 CAS
Presence in List?	0	0

## Sheet: Table S2
Marked in green: HS with at least 3 homologues and systematic RT shifts
Marked in red: Less than 3 homologues or no systematic RT shifts of at least 3 homologues
HS #	4	750.916	850.91	900.907	800.913	850.91	1050.9	1100.9	1150.89	1200.89	1250.89	1300.88	750.916
HS #	6	300.98	850.945	250.987	1000.94	1050.94
HS #	7	650.995	750.988	850.98	1250.96
HS #	14	852.926	1002.92	902.923	952.92	1152.91	1252.9
HS #	15	1302.94	1352.93	1252.94	1302.94
HS #	16	153.031	952.975	1002.98
HS #	17	1002.98	952.981	1052.98	1152.97	1302.96	1102.98	1202.97
HS #	21	353.922	653.9	903.884
HS #	28	954.899	1004.89	1054.89	1104.89	1154.88
HS #	30	1204.95	1154.95	904.963	1304.94	1104.95	1304.94
HS #	38	556.921	756.903	806.901
HS #	39	756.925	806.921	856.917
HS #	40	556.966	606.962	456.968	1056.93	656.96	756.954	856.947
HS #	42	606.998	1056.97	1106.96	1156.96
HS #	50	158.979	1208.92	758.945	458.966	1258.91
HS #	51	908.943	1008.94	108.996	108.996	108.996	1008.94
HS #	53	658.995	858.981	908.978	808.986
HS #	55	659.036	209.061	909.015
HS #	56	309.077	259.077	1059.03	309.077
HS #	57	1109.05	1209.04	1259.04	1309.03	1359.03
HS #	64	460.933	360.936	1160.89
HS #	65	910.908	560.931	1010.9	1060.9
HS #	66	1310.9	1210.91	1360.9	1310.91
HS #	68	1110.96	1210.95	1260.95	1160.95
HS #	69	211.061	561.035	661.032	761.025
HS #	73	361.827	1061.78	961.791
HS #	77	961.917	1011.91	1061.91	1011.91	1111.91	1161.9
HS #	81	712.934	762.931	812.927
HS #	82	212.979	262.976	312.973	412.966	362.97	512.96	512.96	562.957	612.953	662.95	312.971	712.947	762.944	812.941	862.936	912.934	962.93	1012.93	462.964	562.958
HS #	83	1062.94	1112.93	1162.93	1362.92
HS #	84	213.033	912.983	1262.96
HS #	86	813.018	663.028	913.011	1013	1113	363.04
HS #	90	1163.94	1013.94	263.999	263.999
HS #	92	714.884	1014.86	1114.86	1214.85
HS #	93	664.897	814.886	864.885
HS #	94	514.916	1114.88	1164.87	1214.87	764.899	964.89	964.889
HS #	95	1214.91	1264.9	1314.9	1314.9	1364.9
HS #	96	114.989	814.944	1064.92
HS #	99	115.076	815.028	1364.99	1015.02
HS #	107	766.912	866.905	866.905	916.902	966.899	1016.9	1166.89	1316.88	1216.88	1266.88	1366.87
HS #	108	1066.93	1116.93	1166.92	1216.92	866.941	1016.93	916.939	966.935	466.967
HS #	109	816.957	1266.93	216.99	316.983	516.97	1366.92
HS #	112	167.071	1217	1317	217.066
HS #	113	267.082	317.075	417.072
HS #	114	517.071	667.061	517.071	267.087	367.082
HS #	117	1218.77	868.795	718.802	868.795
HS #	118	1268.81	1218.81	1218.81	1168.82	1168.82
HS #	119	868.922	918.917	968.914	1018.91	1068.91	1118.9	868.919	1318.89
HS #	120	168.99	218.986	268.983	318.98	368.977	418.973	468.97	268.983	518.967	368.976	568.964	618.96	668.957	718.954	768.951	818.947	868.943	918.94	968.937	168.989	168.989	418.974
HS #	121	918.954	1268.93	318.989
HS #	123	918.985	1268.96	219.027
HS #	124	669.01	968.986	1318.97
HS #	125	219.066	469.046	1318.99
HS #	131	570.918	1170.88	1220.88	1270.87	1070.89	1120.88
HS #	132	720.943	770.939	770.939	1070.92	1120.92
HS #	133	970.945	620.965	770.956	620.966
HS #	135	221.012	670.98	471.001	1170.95	1370.94
HS #	136	871.001	970.995	1070.99	1070.99	771.005
HS #	140	1071.89	1321.87	1271.87
HS #	142	571.966	771.952	921.939
HS #	143	272.014	1271.95	671.989
HS #	151	772.919	822.916	872.912	922.909	222.952
HS #	152	422.967	522.959	622.953	472.963	472.96
HS #	153	822.974	472.996	472.995	1172.95	1222.95
HS #	154	273.053	373.045	973.005	1122.99	1123
HS #	158	923.92	1073.91	423.951
HS #	165	574.957	624.953	674.95	874.937	74.9907	74.9905	74.9906
HS #	166	1174.94	1374.92	774.957
HS #	167	1124.96	874.976	924.973	574.996	624.993	774.984	824.98	674.99
HS #	172	1125.87	225.928	1275.86
HS #	173	276.034	875.993	925.991	975.986
HS #	177	1176.92	1326.9	1376.9
HS #	178	1226.95	1276.94	1376.94	726.975
HS #	181	1377.97	1177.98	1277.98	1377.97
HS #	182	1128.79	1178.78	928.795
HS #	184	728.929	828.923	878.919	778.928	728.929	1378.89
HS #	185	1028.94	1078.93	1128.93	1178.92	1228.92	1278.92
HS #	189	1129.95	1179.95	280.012
HS #	192	580.949	1180.91	680.943	1230.9	1330.89	1380.89
HS #	193	280.983	330.98	480.97	530.967	580.963	480.97	630.96	680.955	730.95	780.95	830.947	430.974	430.974
HS #	197	1280.98	1380.97	1130.99	1230.98	1080.99	1180.98
HS #	202	932.896	1232.88	982.894	1282.88	1332.87	1382.87
HS #	203	482.935	432.938	1332.88	1382.88	1332.88	482.935
HS #	204	1182.92	932.934	1082.92	1132.92	1282.91	1332.91
HS #	206	483.005	632.994	732.986	433.006
HS #	207	683.001	732.996	832.99	932.984	1132.97
HS #	210	283.061	233.061	1133	1233	1332.99
HS #	215	1133.93	233.989	1233.92
HS #	220	1134.83	134.894	934.842
HS #	221	984.882	1034.88	934.884
HS #	222	684.925	734.922	784.918	1384.88	984.909	934.91	1134.9	1184.89	1084.9
HS #	224	934.948	1234.93	984.945	884.948
HS #	226	135.045	1184.98	785	485.018	485.018	585.012	685.006	485.019	685.006	485.019	784.999	635.018
HS #	228	585.057	1135.02	785.045	1285.01	1385.01	885.04	935.036	985.034	1085.03	1185.02
HS #	232	1236.87	1286.87	936.89	1336.86
HS #	233	986.913	786.924	436.949	536.941
HS #	234	786.934	636.94	886.928	936.924	1336.9	836.931	1086.92	1136.91	1086.92
HS #	235	536.976	636.969	486.978	486.978	1386.92
HS #	237	137.024	586.995	786.981	886.972	1386.94
HS #	244	838.044	888.04	938.038
HS #	246	838.89	888.887	888.886	938.884
HS #	247	288.937	1188.88	1088.89
HS #	248	188.952	888.907	988.9	1038.9	838.912	938.904
HS #	249	188.972	1238.9	388.96	338.963
HS #	250	288.98	638.953	988.932	688.949	638.952
HS #	251	638.968	838.953	838.954	588.972	638.963	838.947
HS #	252	688.98	1338.94	1388.93	788.974	788.975	888.968	988.962	1088.96	688.981	1188.95	688.981	1288.94	888.968	1388.94	688.98	1088.96	1188.95	888.968	788.975	788.975	988.962	888.969
HS #	253	189.022	1188.96	1238.96
HS #	264	290.998	1240.94	790.965
HS #	265	341	440.997	490.994	590.988	640.984	740.978	1190.95	540.991	91.0219	91.022	91.0218
HS #	267	291.082	441.069	1291.02
HS #	270	1141.96	391.999	841.974
HS #	274	742.869	892.858	642.878
HS #	276	1242.91	1342.9	992.921
HS #	277	392.978	592.964	492.97	442.972	592.963	542.965	692.957	642.958	792.951	642.958	542.965	742.952	442.972	892.944	742.953	842.946	742.952	842.946
HS #	278	392.985	542.973	442.983
HS #	279	1142.95	1342.93	1392.93
HS #	293	394.976	694.957	594.962	644.959	794.948	1044.93	1144.93	544.968	1194.92	1294.91
HS #	294	195.066	245.061	245.061	1145	195.066
HS #	297	295.899	1045.85	195.907
HS #	300	646.871	546.875	446.879
HS #	302	996.902	796.913	846.912	896.909	96.96	796.91
HS #	304	546.95	646.942	696.939	746.937
HS #	305	196.984	446.968	546.961	596.955	646.954	396.971	346.977	696.956	946.94
HS #	306	896.952	946.948	996.945	1296.93	1346.92	1046.94
HS #	309	197.061	847.015	1246.99	347.049	947.008	297.047	297.047	297.047	297.047	297.047
HS #	315	1097.95	1147.95	1197.94	1247.94	1297.93
HS #	317	1197.97	1297.97	1397.96
HS #	321	498.93	448.933	548.927	548.926	598.923	1148.89	498.93
HS #	322	848.92	948.915	1048.91	1248.9	898.917	1148.9	448.944	948.906
HS #	323	248.973	1148.91	1198.91	1248.91	248.974	1048.92	1198.91	1248.91	1298.91	1348.9	948.93
HS #	325	149.024	199.017	548.997
HS #	326	349.034	998.99	1198.98

## Sheet: Table S3
Measured m/z	Exact Mass Value in List	Formula	CAS	Preferred Name
196.984	197.992	C4HF7O	375-02-0	Perfluorobutyraldehyde
212.979	213.986	C4HF7O2	375-22-4	Perfluorobutanoic acid
212.979	213.986	C4HF7O2	335-10-4	Perfluoroisobutyric acid
218.986	219.993	C4HF9	375-17-7	1H-Nonafluorobutane
248.974	249.984	C5F10	72804-49-0	Perfluoro-2-pentene
248.974	249.984	C5F10	21581-82-8	1,1,2,3,4,4,4-Heptafluoro-3-(trifluoromethyl)but-1-ene
248.974	249.984	C5F10	376-77-2	Decafluorocyclopentane
248.974	249.984	C5F10	376-87-4	Perfluoropent-1-ene
260.991	262	C6H6ClF7O	679-53-8	4-(2-Chloroethoxy)-1,1,1,2,2,3,3-heptafluorobutane
262.976	263.983	C5HF9O2	2706-90-3	Perfluoropentanoic acid
268.983	269.99	C5HF11	375-61-1	1,1,1,2,2,3,3,4,4,5,5-Undecafluoropentane
268.983	269.99	C5HF11	375-61-1	1,1,1,2,2,3,3,4,4,5,5-Undecafluoropentane
269.045	270.049	C8H9F7O2	88021-93-6	Hexanoic acid, 4,4,5,5,6,6,6-heptafluoro-2-methyl-, methyl ester
269.045	270.049	C8H9F7O2	25600-64-0	4,4,5,5,6,6,6-Heptafluorohexyl acetate
269.045	270.049	C8H9F7O2	424-66-8	Ethyl 4,4,5,5,6,6,6-heptafluorohexanoate
269.045	270.049	C8H9F7O2	1559-07-5	Butyl heptafluorobutanoate
269.045	270.049	C8H9F7O2	2926-44-5	2,2,3,3,4,4,4-Heptafluorobutyl butanoate
269.045	270.049	C8H9F7O2	136909-75-6	4,4,5,5,6,6,6-Heptafluorohexan-2-yl acetate
269.045	270.049	C8H9F7O2	425-24-1	tert-Butyl heptafluorobutanoate
272.014	273.02	C7H4F9N	26649-23-0	4,4,5,5,6,6,7,7,7-Nonafluoroheptanenitrile
275.031	276.039	C10H7F7O	97745-82-9	1-(Heptafluoropropyl)-4-methoxybenzene
275.031	276.039	C10H7F7O	1137162-24-3	[4-(1,1,1,2,3,3,3-Heptafluoropropan-2-yl)phenyl]methanol
275.031	276.039	C10H7F7O	785-93-3	(Perfluoropropyl)phenylmethanol
275.031	276.039	C10H7F7O	97745-82-9	1-(Heptafluoropropyl)-4-methoxybenzene
275.031	276.039	C10H7F7O	1137162-24-3	[4-(1,1,1,2,3,3,3-Heptafluoropropan-2-yl)phenyl]methanol
275.031	276.039	C10H7F7O	785-93-3	(Perfluoropropyl)phenylmethanol
280.983	281.99	C6HF11	308-24-7	Undecafluorocyclohexane
280.983	281.99	C6HF11	391199-64-7	(1E)-1,2,3,3,4,4,5,5,6,6,6-Undecafluorohex-1-ene
294.009	295.019	C7H4F7N3O2	82633-69-0	3-(Heptafluoropropyl)-5-methyl-4-nitro-1H-pyrazole
301.062	302.072	C10H11F9	131294-67-2	(5E)-1,1,1,2,2,3,3,4,4-Nonafluorodec-5-ene
312.971	313.98	C6HF11O2	307-24-4	Perfluorohexanoic acid
312.973	313.98	C6HF11O2	307-24-4	Perfluorohexanoic acid
316.983	317.99	C9HF11	153817-18-6	1,2,4,5-Tetrafluoro-3-(heptafluoropropyl)benzene
318.98	319.987	C6HF13	355-37-3	1H-Perfluorohexane
318.98	319.987	C6HF13	1998-67-0	1,1,1,2,2,3,3,4,5,5,6,6,6-Tridecafluorohexane
318.98	319.987	C6HF13	30320-28-6	2H-Perfluoro(2-methylpentane)
318.989	319.995	C10H4ClF7N2	6866-58-6	Benzimidazole, 5(or 6)-chloro-2-(heptafluoropropyl)-
322.917	323.925	C5H4F7I	99324-96-6	2-(2-Iodoethyl)perfluoropropane
322.917	323.925	C5H4F7I	1513-88-8	3:2 Fluorotelomer iodide
330.98	331.987	C7HF13	75180-14-2	1H-Perfluoro-1-heptene
330.98	331.987	C7HF13	648-39-5	1,1,1,2,2,3,5,5,6,6,7,7,7-Tridecafluorohept-3-ene
334.971	335.981	C9F12	54326-26-0	1,2,3,4,5-Pentafluoro-6-(heptafluoropropyl)benzene
334.971	335.981	C9F12	17480-16-9	1,2,3,4,5-Pentafluoro-6-(1,1,1,2,3,3,3-heptafluoropropan-2-yl)benzene
338.963	339.969	C7H9Cl2F7OSi	20006-68-2	Dichloro-3-(perfluoro-2-propoxy)propylmethylsilane
346.931	347.941	C6ClF11O2	72848-57-8	2,3,3,3-Tetrafluoro-2-(heptafluoropropoxy)propanoyl chloride
346.977	347.982	C7HF13O	63967-41-9	Perfluoroheptanal
346.977	347.982	C7HF13O	73928-40-2	1,1,2,2,3,3,4,4,5,5-Decafluoro-1-((trifluorovinyl)oxy)pentane
349.034	350.039	C12H9F7O4	87461-68-5	2,5-Dimethoxyphenyl heptafluorobutanoate
352.905	353.915	C6H3F8I	203929-12-8	3,3,4,4,5,5,6,6-Octafluoro-6-iodohex-1-ene
362.97	363.977	C7HF13O2	375-85-9	Perfluoroheptanoic acid
362.97	363.977	C7HF13O2	15899-29-3	Perfluoro-5-(trifluoromethyl)hexanoic acid
362.97	363.977	C7HF13O2	922168-41-0	1,1,1,3,3,3-Hexafluoropropan-2-yl heptafluorobutanoate
362.97	363.976	C10F12O	19108-37-3	2,2,3,3,4,4,4-Heptafluoro-1-(pentafluorophenyl)butan-1-one
368.976	369.984	C7HF15	375-83-7	1-Hydroperfluoroheptane
368.977	369.984	C7HF15	375-83-7	1-Hydroperfluoroheptane
378.892	379.9	C6H4Cl3F9Si	78560-47-1	Trichloro(1,1,2,2,3,3,6,6,6-nonafluorohexyl)silane
391.999	393.008	C10H8F9NO3S	1440968-24-0	N-(1,1,2,2,3,3,4,4,4-Nonafluorobutane-1-sulfonyl)cyclopent-2-ene-1-carboxamide
393.016	394.024	C9H7F13O2	107650-06-6	4,4,5,5,6,6,7,7,8,8,9,9,9-tridecafluorononane-1,2-diol
393.016	394.024	C9H7F13O2	54336-60-6	2-[(2,2,3,3,4,4,5,5,6,6,7,7,7-Tridecafluoroheptyl)oxy]ethan-1-ol
394.961	395.969	C7H4F12O3S	171182-86-8	3,3,4,4,5,5,6,6,6-Nonafluorohexyl trifluoromethanesulfonate
394.961	395.969	C7H4F12O3S	118334-94-4	1,1,1-Trifluoropropan-2-yl nonafluorobutane-1-sulfonate
394.976	395.983	C8H2F14O2	13973-14-3	8-H-Perfluorooctanoic acid
394.976	395.983	C8H2F14O2	308-45-2	2,2,3,3,4,4,4-Heptafluorobutyl heptafluorobutanoate
396.971	397.979	C8HF15O	335-60-4	Perfluorooctanal
396.971	397.979	C8HF15O	71302-72-2	Furan, 2,2,3,3,4,4-hexafluorotetrahydro-5-(2,2,2-trifluoro-1,1-bis(trifluoromethyl)ethyl)-
396.971	397.978	C11F14	103634-36-2	2,3,4,5,7,7,8-Heptafluoro-8-(1,1,1,2,3,3,3-heptafluoropropan-2-yl)bicyclo[4.2.0]octa-1,3,5-triene
399.046	400.05	C9H13F9N2O3S	178094-76-3	3-[(Perfluorobutane-1-sulfonyl)amino]-N,N-dimethylpropan-1-amine N-oxide
399.046	400.053	C11H11F11O3	183873-55-4	Pentyl 2,3,3,3-tetrafluoro-2-(heptafluoropropoxy)propanoate
399.046	400.053	C11H11F11O3	183873-56-5	3-Methylbutyl 2,3,3,3-tetrafluoro-2-(heptafluoropropoxy)propanoate
407.03	408.039	C10H9F13O2	142502-76-9	1,1,1,2,2,3,3,4,4,5,5,6,6-Tridecafluoro-8,8-dimethoxyoctane
407.03	408.039	C10H9F13O2	147274-18-8	1,2-Decanediol, 5,5,6,6,7,7,8,8,9,9,10,10,10-tridecafluoro-
407.03	408.039	C10H9F13O2	55427-50-4	2-[(3,3,4,4,5,5,6,6,7,7,8,8,8-Tridecafluorooctyl)oxy]ethan-1-ol
412.966	413.974	C8HF15O2	335-67-1	Perfluorooctanoic acid
412.966	413.974	C8HF15O2	15166-06-0	Perfluoro-6-(trifluoromethyl)heptanoic acid
412.966	413.973	C11F14O	1610931-27-5	2,2,3,3,4,4,5,5,5-Nonafluoro-1-(pentafluorophenyl)pentan-1-one
412.966	413.974	C8HF15O2	1812247-20-3	2,2,4,4,5,5,6,6,6-Nonafluoro-3,3-bis(trifluoromethyl)hexanoic acid
412.966	413.974	C8HF15O2	1882109-58-1	3,3,4,4,4-Pentafluoro-2,2-bis(pentafluoroethyl)butanoic acid
412.966	413.974	C8HF15O2	1882109-59-2	3,3,4,4,4-Pentafluoro-2-(1,1,1,2,3,3,3-heptafluoropropan-2-yl)-2-(trifluoromethyl)butanoic acid
412.966	413.974	C8HF15O2	1882109-60-5	2,3,3,4,4,4-Hexafluoro-2-[1,1,1,3,3,3-hexafluoro-2-(trifluoromethyl)propan-2-yl]butanoic acid
412.966	413.974	C8HF15O2	1882109-61-6	2,3,4,4,4-Pentafluoro-2-(1,1,1,2,3,3,3-heptafluoropropan-2-yl)-3-(trifluoromethyl)butanoic acid
412.966	413.974	C8HF15O2	1882109-62-7	4,4,4-Trifluoro-2,2,3,3-tetrakis(trifluoromethyl)butanoic acid
412.966	413.974	C8HF15O2	1882109-63-8	3,3,4,4,5,5,5-Heptafluoro-2-(pentafluoroethyl)-2-(trifluoromethyl)pentanoic acid
412.966	413.974	C8HF15O2	1882109-64-9	2,3,4,4,5,5,5-Heptafluoro-2-(pentafluoroethyl)-3-(trifluoromethyl)pentanoic acid
412.966	413.974	C8HF15O2	1882109-65-0	2,3,3,4,5,5,5-Heptafluoro-2-(pentafluoroethyl)-4-(trifluoromethyl)pentanoic acid
412.966	413.974	C8HF15O2	1882109-66-1	2,3,4,4,5,5,5-Heptafluoro-3-(pentafluoroethyl)-2-(trifluoromethyl)pentanoic acid
412.966	413.974	C8HF15O2	1882109-67-2	2,2,4,4,5,5,5-Heptafluoro-3-(pentafluoroethyl)-3-(trifluoromethyl)pentanoic acid
412.966	413.974	C8HF15O2	1882109-68-3	2,2,3,4,4,5,5,5-Octafluoro-3-(1,1,1,2,3,3,3-heptafluoropropan-2-yl)pentanoic acid
412.966	413.974	C8HF15O2	1882109-69-4	3,4,4,5,5,5-Hexafluoro-2,2,3-tris(trifluoromethyl)pentanoic acid
412.966	413.974	C8HF15O2	1882109-70-7	3,3,4,5,5,5-Hexafluoro-2,2,4-tris(trifluoromethyl)pentanoic acid
412.966	413.974	C8HF15O2	1882109-71-8	2,4,4,5,5,5-Hexafluoro-2,3,3-tris(trifluoromethyl)pentanoic acid
412.966	413.974	C8HF15O2	1882109-72-9	2,3,4,5,5,5-Hexafluoro-2,3,4-tris(trifluoromethyl)pentanoic acid
412.966	413.974	C8HF15O2	1882109-73-0	2,3,3,5,5,5-Hexafluoro-2,4,4-tris(trifluoromethyl)pentanoic acid
412.966	413.974	C8HF15O2	1882109-74-1	2,2,4,5,5,5-Hexafluoro-3,3,4-tris(trifluoromethyl)pentanoic acid
412.966	413.974	C8HF15O2	1882109-75-2	2,2,3,5,5,5-Hexafluoro-3,4,4-tris(trifluoromethyl)pentanoic acid
412.966	413.974	C8HF15O2	1882109-76-3	2,3,3,4,4,5,5,5-Octafluoro-2-(1,1,1,2,3,3,3-heptafluoropropan-2-yl)pentanoic acid
412.966	413.974	C8HF15O2	1882109-77-4	2,3,3,4,4,5,5,5-Octafluoro-2-(heptafluoropropyl)pentanoic acid
412.966	413.974	C8HF15O2	1882109-78-5	2,2,3,4,4,5,5,6,6,6-Decafluoro-3-(pentafluoroethyl)hexanoic acid
412.966	413.974	C8HF15O2	1882109-79-6	2,2,3,3,4,5,5,6,6,6-Decafluoro-4-(pentafluoroethyl)hexanoic acid
412.966	413.974	C8HF15O2	1882109-80-9	2,3,3,4,4,5,6,6,6-Nonafluoro-2,5-bis(trifluoromethyl)hexanoic acid
412.966	413.974	C8HF15O2	1882109-81-0	2,2,3,4,5,5,6,6,6-Nonafluoro-3,4-bis(trifluoromethyl)hexanoic acid
412.966	413.974	C8HF15O2	35605-76-6	2,3,3,4,4,5,5,6,6,6-Decafluoro-2-(pentafluoroethyl)hexanoic acid
412.966	413.974	C8HF15O2	207678-51-1	2,3,3,4,4,5,5,6,6,7,7,7-Dodecafluoro-2-(trifluoromethyl)heptanoic acid
412.966	413.974	C8HF15O2	705240-04-6	2,2,3,4,4,5,5,6,6,7,7,7-Dodecafluoro-3-(trifluoromethyl)heptanoic acid
412.966	413.974	C8HF15O2	909009-42-3	2,2,3,3,4,4,5,6,6,7,7,7-Dodecafluoro-5-(trifluoromethyl)heptanoic acid
412.966	413.974	C8HF15O2	1144512-18-4	2,2,3,3,4,5,5,6,6,7,7,7-Dodecafluoro-4-(trifluoromethyl)heptanoic acid
412.966	413.974	C8HF15O2	1144512-34-4	2,2,3,3,4,4,6,6,6-Nonafluoro-5,5-bis(trifluoromethyl)hexanoic acid
412.966	413.974	C8HF15O2	1144512-35-5	2,2,3,4,4,5,6,6,6-Nonafluoro-3,5-bis(trifluoromethyl)hexanoic acid
412.966	413.974	C8HF15O2	1144512-36-6	2,2,3,3,4,5,6,6,6-Nonafluoro-4,5-bis(trifluoromethyl)hexanoic acid
412.966	413.974	C8HF15O2	1192593-79-5	2,2,3,3,5,5,6,6,6-Nonafluoro-4,4-bis(trifluoromethyl)hexanoic acid
412.966	413.974	C8HF15O2	1812247-17-8	3,3,4,4,5,5,6,6,6-Nonafluoro-2,2-bis(trifluoromethyl)hexanoic acid
412.966	413.974	C8HF15O2	1812247-18-9	2,3,4,4,5,5,6,6,6-Nonafluoro-2,3-bis(trifluoromethyl)hexanoic acid
412.966	413.974	C8HF15O2	1812247-19-0	2,3,3,4,5,5,6,6,6-Nonafluoro-2,4-bis(trifluoromethyl)hexanoic acid
417.016	418.024	C11H7F13O2	17527-29-6	6:2 Fluorotelomer acrylate
417.016	418.024	C11H7F13O2	48076-44-4	(Perfluorohexyl)methyl methacrylate
417.016	418.024	C11H7F13O2	1401315-55-6	2-(Tridecafluorohexyl)-5,6-dihydro-2H-pyran-2-ol
418.973	419.981	C8HF17	335-65-9	8H-Perfluorooctane
418.974	419.981	C8HF17	335-65-9	8H-Perfluorooctane
421.062	422.072	C12H12F14	69125-82-2	1,1,1,2,2,3,3,10,10,11,11,12,12,12-Tetradecafluorododecane
440.997	442.005	C10H5F15O2	3108-24-5	Ethyl perfluorooctanoate
440.997	442.005	C10H5F15O2	812-70-4	3-Perfluoroheptylpropanoic acid
442.972	443.981	C10HF17	55009-88-6	3,3,4,4,5,5,6,6,7,7,8,8,9,9,10,10,10-Heptadecafluorodec-1-yne
442.972	443.98	C8H6F13O4P	57678-01-0	6:2 Fluorotelomer phosphate monoester
442.972	443.981	C10HF17	55009-88-6	3,3,4,4,5,5,6,6,7,7,8,8,9,9,10,10,10-Heptadecafluorodec-1-yne
442.972	443.98	C8H6F13O4P	57678-01-0	6:2 Fluorotelomer phosphate monoester
448.933	449.941	C7HF15O3S	375-92-8	Perfluoroheptanesulfonic acid
448.933	449.941	C7HF15O3S	118334-96-6	1,1,1,3,3,3-Hexafluoropropan-2-yl nonafluorobutane-1-sulfonate
460.933	461.941	C8HF15O3S	646-83-3	Perfluoro-4-(perfluoroethyl)cyclohexylsulfonic acid
460.933	461.941	C8HF15O3S	1135682-88-0	Perfluoro-1-(perfluoroethyl)cyclohexanesulfonic acid
460.962	461.971	C10F18	306-94-5	Perflunafene
462.964	463.971	C9HF17O2	375-95-1	Perfluorononanoic acid
462.964	463.971	C9HF17O2	15899-31-7	Perfluoro-6-methylheptanecarboxylic acid
464.994	466.003	C10H4F18	142083-52-1	Decane, 1,1,1,2,2,3,3,4,4,7,7,8,8,9,9,10,10,10-octadecafluoro-
468.97	469.977	C9HF19	375-94-0	1H-Perfluorononane
472.963	473.973	C10H8ClF13O2S	93393-77-2	8-(2-Chloroethanesulfonyl)-1,1,1,2,2,3,3,4,4,5,5,6,6-tridecafluorooctane
473.002	474.01	C12H16F9IO	172701-28-9	9,9,10,10,11,11,12,12,12-Nonafluoro-7-iodododecan-1-ol
480.971	481.981	C9H3F17O3	14548-74-4	Perfluoro(2-(2-propoxypropoxy)-1H,1H-propan-1-ol)
480.972	481.981	C9H3F17O3	14548-74-4	Perfluoro(2-(2-propoxypropoxy)-1H,1H-propan-1-ol)
480.974	481.981	C9H3F17O3	14548-74-4	Perfluoro(2-(2-propoxypropoxy)-1H,1H-propan-1-ol)
482.935	483.943	C8HF17O2S	647-29-0	1,1,2,2,3,3,4,4,5,5,6,6,7,7,8,8,8-heptadecafluorooctane-1-sulfinic Acid
482.935	483.943	C8HF17O2S	647-29-0	1,1,2,2,3,3,4,4,5,5,6,6,7,7,8,8,8-heptadecafluorooctane-1-sulfinic Acid
483.005	484.009	C13H5F13N2O3	164796-44-5	2,2,3,3,4,4,5,5,6,6,7,7,7-Tridecafluoro-N-(4-nitrophenyl)heptanamide
483.043	484.049	C11H13F13N2O2S	50598-28-2	Perfluorohexane sulfonamido amine
483.043	484.047	C12H14F13O3P	350608-55-8	(3,3,4,4,5,5,6,6,7,7,8,8,8-Tridecafluorooctyl)phosphonic acid diethyl ester
487.02	488.027	C12H8F16O2	125370-60-7	2-{[(2,2,3,3,4,4,5,5,6,6,7,7,8,8,9,9-Hexadecafluorononyl)oxy]methyl}oxirane
490.994	492.002	C11H5F17O2	30377-52-7	Ethyl perfluorononan-1-oate
490.994	492.002	C11H5F17O2	34598-33-9	8:3 Fluorotelomer carboxylic acid
490.994	492.002	C11H5F17O2	136022-86-1	3,3,4,4,5,5,6,6,7,7,8,8,9,9,10,10,10-Heptadecafluoro-2-methyldecanoic acid
490.994	492.001	C14H4F16O	171183-94-1	2,2,2-Trifluoro-1-[4-(tridecafluorohexyl)phenyl]ethan-1-one
492.97	493.976	C9H6F15O4P	37013-72-2	7:2 Fluorotelomer dihydrogen phosphate
494.973	495.981	C12H9F9N2O5S2	320599-24-4	N-{4-[(1,1,2,2,3,3,4,4,4-Nonafluorobutane-1-sulfonyl)amino]benzene-1-sulfonyl}acetamide
497.946	498.953	C8H2F17NO2S	754-91-6	Perfluorooctanesulfonamide
498.93	499.937	C8HF17O3S	1763-23-1	Perfluorooctanesulfonic acid
498.93	499.937	C8HF17O3S	927670-12-0	Heptadecafluorooctane-2-sulfonic acid
498.93	499.937	C8HF17O3S	1763-23-1	Perfluorooctanesulfonic acid
498.93	499.937	C8HF17O3S	927670-12-0	Heptadecafluorooctane-2-sulfonic acid
511.075	512.08	C13H17F13N2O2S	34455-22-6	6:2 Fluorotelomer sulfonamide amine
512.96	513.967	C10HF19O2	335-76-2	Perfluorodecanoic acid
512.96	513.967	C10HF19O2	172155-07-6	Perfluoro-3,7-dimethyloctanoic acid
512.96	513.966	C13F18O	19547-30-9	2,3,3,3-Tetrafluoro-1-[2,3,5,6-tetrafluoro-4-(1,1,1,2,3,3,3-heptafluoropropan-2-yl)phenyl]-2-(trifluoromethyl)propan-1-one
512.96	513.967	C10HF19O2	335-76-2	Perfluorodecanoic acid
512.96	513.967	C10HF19O2	172155-07-6	Perfluoro-3,7-dimethyloctanoic acid
512.96	513.966	C13F18O	19547-30-9	2,3,3,3-Tetrafluoro-1-[2,3,5,6-tetrafluoro-4-(1,1,1,2,3,3,3-heptafluoropropan-2-yl)phenyl]-2-(trifluoromethyl)propan-1-one
518.967	519.974	C10HF21	375-97-3	1-H-Perflurodecane
525.977	526.985	C10H6F17NO2S	4151-50-2	N-Ethylperfluorooctanesulfonamide
525.977	526.985	C10H6F17NO2S	4151-50-2	N-Ethylperfluorooctanesulfonamide
542.965	543.973	C10H6F17O4P	57678-03-2	8:2 Fluorotelomer phosphate monoester
542.965	543.973	C10H6F17O4P	57678-03-2	8:2 Fluorotelomer phosphate monoester
544.968	545.974	C11H2F20O2	1765-48-6	11-H-Perfluoroundecanoic acid
546.961	547.969	C11HF21O	63967-42-0	2,2,3,3,4,4,5,5,6,6,7,7,8,8,9,9,10,10,11,11,11-Henicosafluoroundecanal
548.926	549.934	C9HF19O3S	68259-12-1	Perfluorononanesulfonic acid
548.927	549.934	C9HF19O3S	68259-12-1	Perfluorononanesulfonic acid
548.997	550.007	C13H7F17O4	36390-05-3	(3,3,4,4,5,5,6,6,7,7,8,8,9,9,10,10,10-Heptadecafluorodecyl)propanedioic acid
555.952	556.959	C10H4F17NO4S	2806-24-8	N-[(1,1,2,2,3,3,4,4,5,5,6,6,7,7,8,8,8-Heptadecafluorooctyl)sulfonyl]glycine
556.966	557.974	C12H2F20O2	70887-94-4	2H-Perfluoro-2-dodecenoic acid
561.035	562.044	C15H11F17O3	93706-76-4	4,4,5,5,6,6,7,7,8,8,9,9,10,10,11,11,11-Heptadecafluoro-2-hydroxyundecyl 2-methylprop-2-enoate
561.035	562.041	C15H11F13N2O6	58671-32-2	5-(Tridecafluorohexyl)uridine
562.957	563.964	C11HF21O2	2058-94-8	Perfluoroundecanoic acid
562.957	563.964	C11HF21O2	16486-94-5	Perfluoro-9-(trifluoromethyl)decanoic acid
562.958	563.964	C11HF21O2	2058-94-8	Perfluoroundecanoic acid
562.958	563.964	C11HF21O2	16486-94-5	Perfluoro-9-(trifluoromethyl)decanoic acid
580.963	581.968	C16H10BrF15O	610778-18-2	4-Bromo-2-[4,4,5,5,6,6,7,7,8,9,9,9-dodecafluoro-8-(trifluoromethyl)nonyl]phenol
583.982	584.99	C12H8F17NO4S	2991-50-6	2-(N-Ethylperfluorooctanesulfonamido)acetic acid
583.982	584.99	C12H8F17NO4S	2991-50-6	2-(N-Ethylperfluorooctanesulfonamido)acetic acid
592.963	593.97	C11H6F19O4P	78974-42-2	8:2 Fluorotelomer 9-(trifluoromethyl)-dihydrogen phosphate
592.964	593.97	C11H6F19O4P	78974-42-2	8:2 Fluorotelomer 9-(trifluoromethyl)-dihydrogen phosphate
598.923	599.931	C10HF21O3S	335-77-3	Perfluorodecanesulfonic acid
606.998	608.006	C15H16F15I	918-32-1	1,1,1,2,2,3,3,4,4,5,5,6,6,7,7-Pentadecafluoro-9-iodopentadecane
606.998	608.007	C12H6BF21O3	755-53-3	tris((Perfluoropropyl)methyl) borate
612.953	613.961	C12HF23O2	307-55-1	Perfluorododecanoic acid
618.96	619.968	C12HF25	66563-68-6	1,1,1,2,2,3,3,4,4,5,5,6,6,7,7,8,8,9,9,10,10,11,11,12,12-Pentacosafluorododecane
622.953	623.962	C14F24	306-91-2	Tetracosafluorotetradecahydrophenanthrene
624.993	625.997	C14H5F23O	47795-34-6	((Perfluoro-9-methyldecyl)methyl)oxirane
626.954	627.962	C12H5F21O3S	120226-60-0	10:2 Fluorotelomer sulfonic acid
638.952	639.96	C13H2F22O4	87405-74-1	1,1,1,2,6,7,7,7-Octafluoro-2,6-bis(heptafluoropropoxy)heptane-3,5-dione
638.953	639.96	C13H2F22O4	87405-74-1	1,1,1,2,6,7,7,7-Octafluoro-2,6-bis(heptafluoropropoxy)heptane-3,5-dione
640.984	641.992	C14H5F23O2	158607-41-1	Ethyl perfluorododecanoate
642.958	643.967	C12H6F21O4P	57678-05-4	10:2 Fluorotelomer dihydrogen phosphate
642.958	643.967	C12H6F21O4P	563-09-7	Tris(1H,1H-heptafluorobutyl)phosphate
642.958	643.967	C12H6F21O4P	57678-05-4	10:2 Fluorotelomer dihydrogen phosphate
642.958	643.967	C12H6F21O4P	563-09-7	Tris(1H,1H-heptafluorobutyl)phosphate
662.95	663.958	C13HF25O2	16486-96-7	Perfluoro-11-(trifluoromethyl)dodecanoic acid
662.95	663.958	C13HF25O2	72629-94-8	Perfluorotridecanoic acid
662.95	663.959	C18HF21O3	217824-95-8	Perfluoro-2-(2-ethoxyethoxy)-1,1-diphenylethan-1-ol
668.957	669.965	C13HF27	423-66-5	1,1,1,2,2,3,3,4,4,5,5,6,6,7,7,8,8,9,9,10,10,11,11,12,12,13,13-Heptacosafluorotridecane
688.949	689.957	C14H2F24O4	32687-76-6	Bis(2,2,3,3,4,4,5,5,6,6,7,7-dodecafluoroheptanoyl) peroxide
691.001	692.005	C16H6F26	1946796-71-9	(6E)-1,1,1,2,2,3,3,10,10,11,11,12,12,12-Tetradecafluoro-4,4,9,9-tetrakis(trifluoromethyl)dodec-6-ene
692.957	693.964	C13H6F23O4P	94200-56-3	(Perfluoro-9-methyldecyl)ethyl dihydrogen phosphate
712.947	713.955	C14HF27O2	376-06-7	Perfluorotetradecanoic acid
718.954	719.962	C14HF29	66577-33-1	1,1,1,2,2,3,3,4,4,5,5,6,6,7,7,8,8,9,9,10,10,11,11,12,12,13,13,14,14-Nonacosafluorotetradecane
742.952	743.96	C14H6F25O4P	57678-07-6	12:2 Fluorotelomer dihydrogen phosphate
742.952	743.96	C14H6F25O4P	57678-07-6	12:2 Fluorotelomer dihydrogen phosphate
742.953	743.96	C14H6F25O4P	57678-07-6	12:2 Fluorotelomer dihydrogen phosphate
762.944	763.951	C15HF29O2	18024-09-4	Hexacosafluoro-13-(trifluoromethyl)myristic acid
762.944	763.951	C15HF29O2	141074-63-7	Perfluoropentadecanoic acid
771.005	772.012	C19H18F21I	129838-41-1	1,1,1,2,2,3,3,4,4,5,5,6,6,7,7,8,8,9,9,10,10-Henicosafluoro-12-iodononadecane
774.984	775.988	C17H5F29O	94158-67-5	((Perfluorotetradecyl)methyl)oxirane
788.974	789.982	C16H9F26O4P	57677-95-9	6:2 Fluorotelomer phosphate diester
788.975	789.982	C16H9F26O4P	57677-95-9	6:2 Fluorotelomer phosphate diester
788.975	789.982	C16H9F26O4P	57677-95-9	6:2 Fluorotelomer phosphate diester
788.975	789.982	C16H9F26O4P	57677-95-9	6:2 Fluorotelomer phosphate diester
788.975	789.982	C16H9F26O4P	57677-95-9	6:2 Fluorotelomer phosphate diester
788.975	789.982	C16H9F26O4P	57677-95-9	6:2 Fluorotelomer phosphate diester
792.951	793.957	C15H6F27O4P	94200-57-4	((Perfluoro-11-methyldodecyl)ethyl) dihydrogen phosphate
812.941	813.948	C16HF31O2	67905-19-5	Perfluorohexadecanoic acid
824.98	825.985	C18H5F31O	54009-77-7	(1H,1H-Perfluoro-14-methylpentadecyl)oxirane
842.946	843.954	C16H6F29O4P	94200-54-1	14:2 Fluorotelomer dihydrogen phosphate
842.946	843.954	C16H6F29O4P	94200-54-1	14:2 Fluorotelomer dihydrogen phosphate
856.917	857.922	C16F30O6	61097-98-1	Perfluoro-2,3-bis(2,5-dimethyl-1,4-dioxan-3-oxy)butane
862.936	863.945	C17HF33O2	57475-95-3	Perfluoroheptadecanoic acid
874.976	875.981	C19H5F33O	94158-68-6	((Perfluorohexadecyl)methyl)oxirane
892.944	893.951	C17H6F31O4P	93857-42-2	(Perfluoro-13-methyltetradecyl)ethyl dihydrogen phosphate
912.934	913.942	C18HF35O2	16517-11-6	Perfluorooctadecanoic acid
924.973	925.978	C20H5F35O	54009-79-9	(1H,1H-Perfluoro-16-methylheptadecyl)oxirane
924.973	925.98	C20H8F34S	96497-21-1	1,1,1,2,2,3,3,4,4,5,5,6,6,7,7,8,8-Heptadecafluoro-10-[(3,3,4,4,5,5,6,6,7,7,8,8,9,9,10,10,10-heptadecafluorodecyl)sulfanyl]decane
956.943	957.952	C20H8F34S2	42977-21-9	Bis(3,3,4,4,5,5,6,6,7,7,8,8,9,9,10,10,10-heptadecafluorodecyl) disulphide
962.93	963.939	C19HF37O2	133921-38-7	Heptatriacontafluorononadecanoic acid
988.962	989.97	C20H9F34O4P	678-41-1	8:2 Fluorotelomer phosphate diester
988.962	989.97	C20H9F34O4P	678-41-1	8:2 Fluorotelomer phosphate diester
988.962	989.97	C20H9F34O4P	678-41-1	8:2 Fluorotelomer phosphate diester
988.962	989.97	C20H9F34O4P	678-41-1	8:2 Fluorotelomer phosphate diester
1012.93	1013.94	C20HF39O2	68310-12-3	Perfluoroeicosanoic acid
1088.96	1089.96	C22H9F38O4P	78974-41-1	Bis(2-(perfluoro-7-methyloctyl)ethyl) hydrogen phosphate
1088.96	1089.96	C22H9F38O4P	78974-41-1	Bis(2-(perfluoro-7-methyloctyl)ethyl) hydrogen phosphate
1088.96	1089.96	C22H9F38O4P	78974-41-1	Bis(2-(perfluoro-7-methyloctyl)ethyl) hydrogen phosphate
1102.98	1103.98	C22H19F30N2O8PS2	67939-93-9	Bis(2-{ethyl[(perfluoroheptyl)sulfonyl]amino}ethyl) hydrogen phosphate
1188.95	1189.96	C24H9F42O4P	1895-26-7	12:2 Fluorotelomer phosphate diester
1188.95	1189.96	C24H9F42O4P	1895-26-7	12:2 Fluorotelomer phosphate diester
1202.97	1203.98	C24H19F34N2O8PS2	2965-52-8	Bis(2-{ethyl[(perfluorooctyl)sulfonyl]amino}ethyl) hydrogen phosphate
1288.94	1289.95	C26H9F46O4P	93857-55-7	Bis((perfluoro-9-methyldecyl)ethyl) phosphate
1300.88	1301.89	C24HF50O2P	63225-54-7	Bis(pentacosafluorododecyl)phosphinic acid
1388.93	1389.94	C28H9F50O4P	57677-99-3	Bis(2-(perfluorododecyl)ethyl) hydrogen phosphate
1388.94	1389.94	C28H9F50O4P	57677-99-3	Bis(2-(perfluorododecyl)ethyl) hydrogen phosphate

## Sheet: Table S5
Filename: C:\Users\Boris\Desktop\07_Huegelsheim_MeOH_20Inj.xls, compared with: OECD_PFAS_curated_Nikiforos Alygizakis.xls, mass of repeating unit [Da]: 65.9917, Tolerance [Da]: 0.005
Row 1 Mass	923.92	263.999	263.999
Row 1 RT	0.669	3.427	3.553
Row 1 Names
Presence in List?	0	0	0
Row 2 Mass	990.827	1188.8
Row 2 RT	5.497	12.016
Row 2 Names
Presence in List?	0	0
Row 3 Mass	330.98	396.971	462.964	660.935
Row 3 RT	2.527	4.567	2.988	2.445
Row 3 Names	75180-14-2 648-39-5	335-60-4 147492-57-7 71302-72-2 103634-36-2	375-95-1 15899-31-7	65294-16-8
Presence in List?	2	4	2	1
Row 4 Mass	792.926	1188.88	990.906
Row 4 RT	3.331	3.795	4.972
Row 4 Names
Presence in List?	0	0	0
Row 5 Mass	199.017	594.962
Row 5 RT	2.294	3.249
Row 5 Names
Presence in List?	0	0
Row 6 Mass	726.975	1056.93
Row 6 RT	3.338	4.333
Row 6 Names
Presence in List?	0	0
Row 7 Mass	792.979	1056.95
Row 7 RT	3.138	3.62
Row 7 Names
Presence in List?	0	0
Row 8 Mass	1386.92	924.973	858.981
Row 8 RT	3.964	4.246	4.439
Row 8 Names		54009-79-9 96497-21-1
Presence in List?	0	2	0
Row 9 Mass	661.032	1386.94	1254.96	1254.96
Row 9 RT	3.426	3.544	5.083	5.283
Row 9 Names
Presence in List?	0	0	0	0
Row 10 Mass	1122.99	1386.96	1123
Row 10 RT	2.953	4.087	4.122
Row 10 Names
Presence in List?	0	0	0
Row 11 Mass	463.869	991.802
Row 11 RT	0.671	4.813
Row 11 Names
Presence in List?	0	0
Row 12 Mass	925.862	1057.85
Row 12 RT	4.292	4.851
Row 12 Names
Presence in List?	0	0
Row 13 Mass	1321.87	1123.89
Row 13 RT	3.568	5.74
Row 13 Names
Presence in List?	0	0
Row 14 Mass	1123.96	332.059
Row 14 RT	3.498	1.484
Row 14 Names
Presence in List?	0	0
Row 15 Mass	464.053	1255.96
Row 15 RT	3.76	4.85
Row 15 Names
Presence in List?	0	0
Row 16 Mass	398.849	1124.75
Row 16 RT	3.475	4.243
Row 16 Names
Presence in List?	0	0
Row 17 Mass	596.955	794.928	398.977
Row 17 RT	3.351	3.379	3.328
Row 17 Names
Presence in List?	0	0	0
Row 18 Mass	926.933	794.948	992.921	926.933
Row 18 RT	2.856	3.55	6.993	2.987
Row 18 Names
Presence in List?	0	0	0	0
Row 19 Mass	1256.93	399.046
Row 19 RT	4.026	4.924
Row 19 Names		178094-76-3 183873-55-4 183873-56-5
Presence in List?	0	3
Row 20 Mass	1124.96	1190.95
Row 20 RT	3.198	3.216
Row 20 Names
Presence in List?	0	0
Row 21 Mass	267.082	663.028	1388.94
Row 21 RT	3.523	3.939	4.698
Row 21 Names			57677-99-3
Presence in List?	0	0	1
Row 22 Mass	597.938	1125.87
Row 22 RT	3.075	4.908
Row 22 Names
Presence in List?	0	0
Row 23 Mass	136.017	1059.9
Row 23 RT	1.643	7.019
Row 23 Names
Presence in List?	0	0
Row 24 Mass	928.795	1126.77
Row 24 RT	4.105	5.588
Row 24 Names
Presence in List?	0	0
Row 25 Mass	598.923	1060.87
Row 25 RT	3.17	4.832
Row 25 Names	335-77-3
Presence in List?	1	0
Row 26 Mass	334.971	796.91	796.913
Row 26 RT	0.661	3.87	3.51
Row 26 Names	54326-26-0 16500-37-1 17480-16-9
Presence in List?	3	0	0
Row 27 Mass	1126.88	466.967
Row 27 RT	5.74	5.82
Row 27 Names
Presence in List?	0	0
Row 28 Mass	137.024	730.95	862.936
Row 28 RT	1.006	3.55	3.659
Row 28 Names			57475-95-3
Presence in List?	0	0	1
Row 29 Mass	1126.92	1258.9
Row 29 RT	3.281	9.755
Row 29 Names
Presence in List?	0	0
Row 30 Mass	928.974	731.004
Row 30 RT	3.54	3.858
Row 30 Names
Presence in List?	0	0
Row 31 Mass	929.074	1259.04
Row 31 RT	3.15	4.637
Row 31 Names
Presence in List?	0	0
Row 32 Mass	1061.78	1127.77
Row 32 RT	4.653	7.754
Row 32 Names
Presence in List?	0	0
Row 33 Mass	1061.88	1259.86	929.9
Row 33 RT	5.536	8.467	7.158
Row 33 Names
Presence in List?	0	0	0
Row 34 Mass	468.852	1062.78	1062.78	1062.78	1062.78
Row 34 RT	0.618	6.595	6.983	7.07	7.487
Row 34 Names
Presence in List?	0	0	0	0	0
Row 35 Mass	798.892	864.885
Row 35 RT	3.497	3.546
Row 35 Names
Presence in List?	0	0
Row 36 Mass	336.989	534.962	996.902	468.97
Row 36 RT	3.142	3.286	3.028	3.096
Row 36 Names				375-94-0
Presence in List?	0	0	0	1
Row 37 Mass	930.953	996.945	1062.94	1128.93	1194.92	1326.9
Row 37 RT	3.346	3.401	3.446	3.517	3.561	3.704
Row 37 Names
Presence in List?	0	0	0	0	0	0
Row 38 Mass	732.986	1392.91
Row 38 RT	3.556	3.557
Row 38 Names
Presence in List?	0	0
Row 39 Mass	271.061	1062.96
Row 39 RT	2.814	4.879
Row 39 Names	678-93-3
Presence in List?	1	0
Row 40 Mass	1392.93	469.046	337.058	1260.95
Row 40 RT	4.172	4.536	3.419	3.905
Row 40 Names
Presence in List?	0	0	0	0
Row 41 Mass	337.929	997.843	205.942
Row 41 RT	3.147	4.38	1.89
Row 41 Names
Presence in List?	0	0	0
Row 42 Mass	469.944	1261.85
Row 42 RT	3.528	3.541
Row 42 Names
Presence in List?	0	0
Row 43 Mass	932.865	1130.84	1130.84
Row 43 RT	8.913	10.465	11.512
Row 43 Names
Presence in List?	0	0	0
Row 44 Mass	206.975	74.9907	74.9905	74.9906
Row 44 RT	0.668	3.944	5.324	6.12
Row 44 Names
Presence in List?	0	0	0	0
Row 45 Mass	734.922	866.905	800.913	932.896	536.941	866.905
Row 45 RT	2.727	2.814	2.833	2.997	3.339	2.921
Row 45 Names			610800-34-5
Presence in List?	0	0	1	0	0	0
Row 46 Mass	536.976	734.95	668.957
Row 46 RT	3.511	3.539	3.423
Row 46 Names			423-66-5
Presence in List?	0	0	1
Row 47 Mass	932.934	866.941
Row 47 RT	3.304	3.397
Row 47 Names
Presence in List?	0	0
Row 48 Mass	734.997	273.055	273.053	998.961
Row 48 RT	3.374	3.545	3.379	3.698
Row 48 Names
Presence in List?	0	0	0	0
Row 49 Mass	471.067	933.006	1262.96	273.092
Row 49 RT	0.775	3.381	5.491	3.432
Row 49 Names
Presence in List?	0	0	0	0
Row 50 Mass	1197.94	406.04
Row 50 RT	3.259	3.625
Row 50 Names
Presence in List?	0	0
Row 51 Mass	1066.77	868.795	1066.77	868.795
Row 51 RT	4.597	6.294	4.697	3.958
Row 51 Names
Presence in List?	0	0	0	0
Row 52 Mass	538.892	934.842	538.892
Row 52 RT	3.812	3.916	3.975
Row 52 Names
Presence in List?	0	0	0
Row 53 Mass	934.884	604.927
Row 53 RT	2.852	3.349
Row 53 Names
Presence in List?	0	0
Row 54 Mass	1066.89	472.96	472.963
Row 54 RT	2.959	5.818	3.835
Row 54 Names			93393-77-2
Presence in List?	0	0	1
Row 55 Mass	868.922	934.91	604.955	868.919
Row 55 RT	3.282	3.431	3.45	3.377
Row 55 Names
Presence in List?	0	0	0	0
Row 56 Mass	472.996	868.943	472.995
Row 56 RT	3.032	3.747	3.145
Row 56 Names
Presence in List?	0	0	0
Row 57 Mass	275.031	473.002	670.98	934.948	1132.92	1000.94	1198.91	1066.93	1264.9	1330.89	1198.91	1396.89	275.031	868.959	736.976
Row 57 RT	2.421	2.731	3.299	3.54	3.584	3.612	3.678	3.698	3.74	3.868	3.914	3.961	2.535	3.515	3.551
Row 57 Names	97745-82-9 1137162-24-3 785-93-3	172701-28-9											97745-82-9 1137162-24-3 785-93-3
Presence in List?	3	1	0	0	0	0	0	0	0	0	0	0	3	0	0
Row 58 Mass	736.991	407.03
Row 58 RT	3.93	2.649
Row 58 Names		142502-76-9 147274-18-8 55427-50-4
Presence in List?	0	3
Row 59 Mass	539.042	341.067	1132.97
Row 59 RT	0.603	3.841	3.753
Row 59 Names
Presence in List?	0	0	0
Row 60 Mass	341.907	1001.82	1001.82	1001.83
Row 60 RT	0.644	5.515	5.945	4.831
Row 60 Names
Presence in List?	0	0	0	0
Row 61 Mass	276.034	144.046
Row 61 RT	1.921	1.931
Row 61 Names
Presence in List?	0	0
Row 62 Mass	1133.93	671.989
Row 62 RT	3.172	3.55
Row 62 Names
Presence in List?	0	0
Row 63 Mass	342.088	1397.96
Row 63 RT	1.481	4.937
Row 63 Names
Presence in List?	0	0
Row 64 Mass	936.859	1134.83
Row 64 RT	4.27	7.453
Row 64 Names
Presence in List?	0	0
Row 65 Mass	936.924	1134.9	1200.89	1266.88	1332.87	1002.92	1068.91	606.962
Row 65 RT	3.346	3.463	3.522	3.572	3.639	3.37	3.417	3.33
Row 65 Names
Presence in List?	0	0	0	0	0	0	0	0
Row 66 Mass	1332.88	672.966	1332.88
Row 66 RT	3.321	3.334	3.525
Row 66 Names		94158-70-0
Presence in List?	0	1	0
Row 67 Mass	606.998	1332.91
Row 67 RT	3.126	4.119
Row 67 Names	918-32-1 755-53-3
Presence in List?	2	0
Row 68 Mass	211.061	1266.93
Row 68 RT	1.727	4.173
Row 68 Names
Presence in List?	0	0
Row 69 Mass	145.087	211.076	1002.98	1002.98
Row 69 RT	1.613	3.277	3.546	3.071
Row 69 Names				67939-92-8
Presence in List?	0	0	0	1
Row 70 Mass	277.075	673.03	871.001	1266.96
Row 70 RT	2.401	2.641	3.871	4.841
Row 70 Names
Presence in List?	0	0	0	0
Row 71 Mass	1069.92	1333.89
Row 71 RT	3.079	12.223
Row 71 Names
Presence in List?	0	0
Row 72 Mass	1333.97	1267.98
Row 72 RT	2.851	5.734
Row 72 Names
Presence in List?	0	0
Row 73 Mass	1268.81	278.93
Row 73 RT	3.426	14.367
Row 73 Names
Presence in List?	0	0
Row 74 Mass	872.892	806.901	938.884	1004.88	872.891
Row 74 RT	2.779	2.816	2.954	3.041	2.885
Row 74 Names
Presence in List?	0	0	0	0	0
Row 75 Mass	740.928	1004.89	1070.89	806.921	278.986	872.912	938.904
Row 75 RT	3.238	3.46	3.523	3.305	3.34	3.358	3.409
Row 75 Names					34451-25-7
Presence in List?	0	0	0	0	1	0	0
Row 76 Mass	674.95	542.965	542.965
Row 76 RT	3.407	3.496	3.79
Row 76 Names	39187-47-8	57678-03-2	57678-03-2
Presence in List?	1	1	1
Row 77 Mass	213.033	608.978	1070.92	1136.91
Row 77 RT	3.044	3.549	3.874	4.001
Row 77 Names				1127427-64-8
Presence in List?	0	0	0	1
Row 78 Mass	674.99	740.978
Row 78 RT	3.551	3.692
Row 78 Names	94158-66-4
Presence in List?	1	0
Row 79 Mass	1004.96	1268.93
Row 79 RT	3.153	4.517
Row 79 Names
Presence in List?	0	0
Row 80 Mass	1202.97	1268.96	279.084	1070.99	1070.99
Row 80 RT	3.777	3.881	2.091	4.575	4.776
Row 80 Names	2965-52-8
Presence in List?	1	0	0	0	0
Row 81 Mass	213.952	1137.84
Row 81 RT	0.664	4.677
Row 81 Names
Presence in List?	0	0
Row 82 Mass	939.877	1071.86
Row 82 RT	4.518	5.324
Row 82 Names
Presence in List?	0	0
Row 83 Mass	280.012	1137.91
Row 83 RT	3.585	5.508
Row 83 Names
Presence in List?	0	0
Row 84 Mass	610.826	1204.75
Row 84 RT	3.617	3.411
Row 84 Names
Presence in List?	0	0
Row 85 Mass	1270.79	1006.82	1204.8	1138.81
Row 85 RT	3.345	4.736	7.241	10.719
Row 85 Names
Presence in List?	0	0	0	0
Row 86 Mass	280.983	412.966	346.977
Row 86 RT	2.331	2.609	2.847
Row 86 Names	308-24-7 330562-43-1 391199-64-7	335-67-1 15166-06-0 1610931-27-5 1812247-20-3 1882109-58-1 1882109-59-2 1882109-60-5 1882109-61-6 1882109-62-7 1882109-63-8 1882109-64-9 1882109-65-0 1882109-66-1 1882109-67-2 1882109-68-3 1882109-69-4 1882109-70-7 1882109-71-8 1882109-72-9 1882109-73-0 1882109-74-1 1882109-75-2 1882109-76-3 1882109-77-4 1882109-78-5 1882109-79-6 1882109-80-9 1882109-81-0 35605-76-6 207678-51-1 705240-04-6 909009…	2342-07-6 63967-41-9 73928-40-2
Presence in List?	3	40	3
Row 87 Mass	1270.87	1336.86	149.01	149.01	149.01	149.01	149.009
Row 87 RT	3.687	3.747	3.946	4.281	4.723	7.187	10.733
Row 87 Names
Presence in List?	0	0	0	0	0	0	0
Row 88 Mass	874.937	742.952	742.953	742.952	149.024
Row 88 RT	3.732	3.828	4.04	4.304	1.417
Row 88 Names		57678-07-6	57678-07-6	57678-07-6
Presence in List?	0	1	1	1	0
Row 89 Mass	874.976	808.986
Row 89 RT	4.074	4.172
Row 89 Names	94158-68-6
Presence in List?	1	0
Row 90 Mass	1204.95	347.049
Row 90 RT	3.342	3.988
Row 90 Names
Presence in List?	0	0
Row 91 Mass	1007.8	1271.77
Row 91 RT	4.915	7.029
Row 91 Names
Presence in List?	0	0
Row 92 Mass	413.902	1205.8
Row 92 RT	3.499	7.448
Row 92 Names
Presence in List?	0	0
Row 93 Mass	413.962	479.95
Row 93 RT	3.042	3.172
Row 93 Names
Presence in List?	0	0
Row 94 Mass	1007.9	1271.87
Row 94 RT	3.511	4.937
Row 94 Names
Presence in List?	0	0
Row 95 Mass	1073.91	1271.88
Row 95 RT	3.251	3.476
Row 95 Names
Presence in List?	0	0
Row 96 Mass	1271.95	875.993	941.985
Row 96 RT	4.513	3.027	3.06
Row 96 Names
Presence in List?	0	0	0
Row 97 Mass	1140.79	216.909
Row 97 RT	6.086	13.022
Row 97 Names
Presence in List?	0	0
Row 98 Mass	546.95	1074.88	216.99
Row 98 RT	3.136	5.333	2.831
Row 98 Names
Presence in List?	0	0	0
Row 99 Mass	480.972	546.961	612.953	480.971	480.974	480.97	480.97
Row 99 RT	2.823	3.282	3.284	2.942	3.033	3.169	3.369
Row 99 Names	14548-74-4	317817-24-6 63967-42-0	307-55-1	14548-74-4	14548-74-4	14548-74-4	14548-74-4
Presence in List?	1	2	1	1	1	1	1
Row 100 Mass	876.936	942.931
Row 100 RT	2.852	3.706
Row 100 Names
Presence in List?	0	0
Row 101 Mass	151.04	1008.94
Row 101 RT	1.64	3.049
Row 101 Names
Presence in List?	0	0
Row 102 Mass	283.061	217.066
Row 102 RT	3.02	3.199
Row 102 Names	156294-55-2
Presence in List?	1	0
Row 103 Mass	283.078	349.073
Row 103 RT	3.624	3.781
Row 103 Names	90292-33-4 90292-32-3
Presence in List?	2	0
Row 104 Mass	745.984	416.022
Row 104 RT	3.376	4.513
Row 104 Names
Presence in List?	0	0
Row 105 Mass	548.927	482.935	746.897	548.926
Row 105 RT	2.892	3.224	3.451	3.046
Row 105 Names	68259-12-1	647-29-0		68259-12-1
Presence in List?	1	1	0	1
Row 106 Mass	746.937	812.927	878.919	1010.9	680.943
Row 106 RT	3.339	3.386	3.431	3.53	3.278
Row 106 Names
Presence in List?	0	0	0	0	0
Row 107 Mass	680.955	944.922	812.941
Row 107 RT	3.476	3.499	3.564
Row 107 Names			67905-19-5 141977-66-4
Presence in List?	0	0	2
Row 108 Mass	219.027	153.031	1076.92
Row 108 RT	0.737	1.501	3.135
Row 108 Names
Presence in List?	0	0	0
Row 109 Mass	1010.94	483.005	548.997	417.016
Row 109 RT	3.422	2.725	3.072	3.081
Row 109 Names		164796-44-5	36390-05-3	17527-29-6 48076-44-4 1401315-55-6
Presence in List?	0	1	1	3
Row 110 Mass	1208.92	285.041
Row 110 RT	3.269	3.678
Row 110 Names		91481-65-1 2707-76-8 378-08-5
Presence in List?	0	3
Row 111 Mass	813.018	417.072
Row 111 RT	3.869	13.085
Row 111 Names
Presence in List?	0	0
Row 112 Mass	1209.04	1275.03
Row 112 RT	4.451	7.021
Row 112 Names
Presence in List?	0	0
Row 113 Mass	1011.81	1143.78	1143.78
Row 113 RT	4.296	5.905	6.091
Row 113 Names
Presence in List?	0	0	0
Row 114 Mass	1143.87	1077.87	417.955
Row 114 RT	5.028	5.159	3.338
Row 114 Names
Presence in List?	0	0	0
Row 115 Mass	1011.91	549.972	1011.91
Row 115 RT	3.161	3.447	3.243
Row 115 Names		67969-65-7
Presence in List?	0	1	0
Row 116 Mass	154.063	616.009
Row 116 RT	2.882	3.455
Row 116 Names
Presence in List?	0	0
Row 117 Mass	616.803	946.764
Row 117 RT	3.9	4.707
Row 117 Names
Presence in List?	0	0
Row 118 Mass	946.94	1012.93
Row 118 RT	3.129	4.003
Row 118 Names		68310-12-3
Presence in List?	0	1
Row 119 Mass	880.957	946.948	1078.93	1210.91
Row 119 RT	3.318	3.371	3.468	3.577
Row 119 Names
Presence in List?	0	0	0	0
Row 120 Mass	1210.95	1342.93	1276.94	749.012
Row 120 RT	3.84	4.08	3.95	4.05
Row 120 Names
Presence in List?	0	0	0	0
Row 121 Mass	1012.99	353.072
Row 121 RT	2.858	3.414
Row 121 Names
Presence in List?	0	0
Row 122 Mass	815.028	947.008
Row 122 RT	3.083	3.565
Row 122 Names
Presence in List?	0	0
Row 123 Mass	485.842	1145.76
Row 123 RT	0.626	3.422
Row 123 Names
Presence in List?	0	0
Row 124 Mass	552.908	288.937
Row 124 RT	4.096	0.602
Row 124 Names
Presence in List?	0	0
Row 125 Mass	1014.86	90.9855	90.9853
Row 125 RT	3.549	5.32	6.114
Row 125 Names
Presence in List?	0	0	0
Row 126 Mass	948.894	684.925	750.916	750.916
Row 126 RT	4.384	2.641	2.651	2.774
Row 126 Names
Presence in List?	0	0	0	0
Row 127 Mass	948.906	1146.88
Row 127 RT	3.004	5.028
Row 127 Names
Presence in List?	0	0
Row 128 Mass	948.915	91.0219	91.022	91.0218	618.96	486.978	486.978
Row 128 RT	2.856	3.691	3.946	7.191	3.354	3.883	4.185
Row 128 Names	37486-69-4				66563-68-6
Presence in List?	1	0	0	0	1	0	0
Row 129 Mass	816.957	223.029	223.029	223.029	223.029	223.028	223.029
Row 129 RT	0.654	3.503	3.688	3.947	4.289	4.723	5.318
Row 129 Names
Presence in List?	0	0	0	0	0	0	0
Row 130 Mass	487.02	1278.92
Row 130 RT	8.348	3.647
Row 130 Names	125370-60-7
Presence in List?	1	0
Row 131 Mass	883.001	421.062	883.001
Row 131 RT	3.432	5.924	3.544
Row 131 Names		69125-82-2
Presence in List?	0	1	0
Row 132 Mass	685.04	553.055	1080.99	751.03
Row 132 RT	4.145	3.278	3.917	3.348
Row 132 Names
Presence in List?	0	0	0	0
Row 133 Mass	355.885	1015.8	619.854
Row 133 RT	0.64	4.375	3.331
Row 133 Names
Presence in List?	0	0	0
Row 134 Mass	91.957	1015.84	1015.84	91.9574
Row 134 RT	3.946	5.002	5.698	4.282
Row 134 Names
Presence in List?	0	0	0	0
Row 135 Mass	1015.89	949.897
Row 135 RT	2.975	8.949
Row 135 Names
Presence in List?	0	0
Row 136 Mass	158.979	1214.85
Row 136 RT	0.597	3.909
Row 136 Names
Presence in List?	0	0
Row 137 Mass	1016.9	1214.87	422.967
Row 137 RT	3.043	3.215	3.487
Row 137 Names
Presence in List?	0	0	0
Row 138 Mass	950.911	1148.89
Row 138 RT	4.833	4.937
Row 138 Names
Presence in List?	0	0
Row 139 Mass	93.0346	620.965	620.966	1148.9	356.995
Row 139 RT	1.003	3.232	3.477	5.706	3.141
Row 139 Names					79851-29-9 243128-40-7 28793-36-4
Presence in List?	0	0	0	0	3
Row 140 Mass	884.948	1016.93	1082.92	1148.91	1214.91	1346.89
Row 140 RT	3.5	3.509	3.554	3.627	3.699	3.9
Row 140 Names
Presence in List?	0	0	0	0	0	0
Row 141 Mass	159.973	951.877
Row 141 RT	3.537	4.39
Row 141 Names
Presence in List?	0	0
Row 142 Mass	423.951	1215.85
Row 142 RT	3.358	9.13
Row 142 Names
Presence in List?	0	0
Row 143 Mass	1347.9	292.038
Row 143 RT	3.554	4.267
Row 143 Names
Presence in List?	0	0
Row 144 Mass	1216.8	1150.81	1150.81	1150.81
Row 144 RT	8.758	9.32	9.621	9.986
Row 144 Names
Presence in List?	0	0	0	0
Row 145 Mass	556.921	1216.83
Row 145 RT	3.501	7.823
Row 145 Names
Presence in List?	0	0
Row 146 Mass	688.949	556.966	622.953
Row 146 RT	2.582	3.243	3.633
Row 146 Names	32687-76-6	70887-94-4	306-91-2
Presence in List?	1	1	1
Row 147 Mass	490.994	556.982	227.025	227.025	754.961
Row 147 RT	3.242	3.509	4.721	5.318	4.032
Row 147 Names	30377-52-7 34598-33-9 136022-86-1 171183-94-1
Presence in List?	4	0	0	0	0
Row 148 Mass	1216.92	1282.91	1348.9
Row 148 RT	3.897	4.023	4.172
Row 148 Names
Presence in List?	0	0	0
Row 149 Mass	952.975	1216.94
Row 149 RT	3.068	5.577
Row 149 Names	1233312-87-2
Presence in List?	1	0
Row 150 Mass	425.092	1282.99	1282.99
Row 150 RT	3.945	5.315	5.509
Row 150 Names
Presence in List?	0	0	0
Row 151 Mass	1349	1085.03
Row 151 RT	3.909	4.214
Row 151 Names
Presence in List?	0	0
Row 152 Mass	1019.83	1283.8
Row 152 RT	4.824	7.569
Row 152 Names
Presence in List?	0	0
Row 153 Mass	1218.77	1152.79
Row 153 RT	4.422	4.654
Row 153 Names
Presence in List?	0	0
Row 154 Mass	1218.81	1152.82	1152.82	1218.81
Row 154 RT	8.115	11.56	12.029	8.374
Row 154 Names
Presence in List?	0	0	0	0
Row 155 Mass	1020.85	1086.84	96.96	360.936
Row 155 RT	2.975	4.454	13.014	3.44
Row 155 Names				2106-55-0
Presence in List?	0	0	0	1
Row 156 Mass	756.903	888.886	822.895	888.887
Row 156 RT	2.72	2.829	2.831	2.919
Row 156 Names
Presence in List?	0	0	0	0
Row 157 Mass	690.932	888.907	756.925	822.916	954.899
Row 157 RT	3.184	3.377	3.262	3.323	3.426
Row 157 Names
Presence in List?	0	0	0	0	0
Row 158 Mass	492.97	624.953
Row 158 RT	3.241	3.338
Row 158 Names	63967-43-1 37013-72-2
Presence in List?	2	0
Row 159 Mass	1086.92	1086.92	1152.91
Row 159 RT	6.912	3.922	4.058
Row 159 Names
Presence in List?	0	0	0
Row 160 Mass	822.974	888.968	888.968	888.969	888.968
Row 160 RT	0.67	3.497	4.506	5.54	6.405
Row 160 Names
Presence in List?	0	0	0	0	0
Row 161 Mass	756.997	691.001
Row 161 RT	3.297	3.783
Row 161 Names		1946796-71-9
Presence in List?	0	1
Row 162 Mass	1218.95	757.001
Row 162 RT	3.764	4.049
Row 162 Names
Presence in List?	0	0
Row 163 Mass	1152.97	1086.98
Row 163 RT	3.704	2.996
Row 163 Names
Presence in List?	0	0
Row 164 Mass	1218.97	1350.95
Row 164 RT	3.237	4.117
Row 164 Names
Presence in List?	0	0
Row 165 Mass	295.899	1021.81
Row 165 RT	0.621	4.932
Row 165 Names
Presence in List?	0	0
Row 166 Mass	1351.79	1219.81
Row 166 RT	3.599	7.818
Row 166 Names
Presence in List?	0	0
Row 167 Mass	824.77	1022.75
Row 167 RT	3.949	10.321
Row 167 Names
Presence in List?	0	0
Row 168 Mass	165.005	1088.89
Row 168 RT	4.284	3.617
Row 168 Names
Presence in List?	0	0
Row 169 Mass	494.973	626.954	692.947	1154.88	1220.88	1286.87
Row 169 RT	2.827	3.303	3.327	3.565	3.642	3.708
Row 169 Names	320599-24-4	120226-60-0
Presence in List?	1	1	0	0	0	0
Row 170 Mass	758.945	692.957
Row 170 RT	3.325	3.549
Row 170 Names		94200-56-3
Presence in List?	0	1
Row 171 Mass	956.943	165.041	165.041	165.041	165.041	165.041
Row 171 RT	3.977	4.281	4.724	5.319	7.188	3.946
Row 171 Names	42977-21-9
Presence in List?	1	0	0	0	0	0
Row 172 Mass	363.04	1352.91	297.047	824.98	297.047	297.047	297.047	297.047
Row 172 RT	2.647	3.687	3.69	3.912	3.947	4.289	5.318	7.189
Row 172 Names				54009-77-7
Presence in List?	0	0	0	1	0	0	0	0
Row 173 Mass	561.035	1352.93
Row 173 RT	3.237	3.37
Row 173 Names	93706-76-4 58671-32-2
Presence in List?	2	0
Row 174 Mass	231.944	429.914
Row 174 RT	0.678	3.769
Row 174 Names
Presence in List?	0	0
Row 175 Mass	1089.99	430.074
Row 175 RT	3.176	5.298
Row 175 Names
Presence in List?	0	0
Row 176 Mass	430.974	562.957	1354.86	562.958	430.974
Row 176 RT	2.829	3.191	3.573	3.05	3.052
Row 176 Names	152914-73-3	2058-94-8 16486-94-5		2058-94-8 16486-94-5	152914-73-3
Presence in List?	1	2	0	2	1
Row 177 Mass	826.939	694.957	826.942
Row 177 RT	2.849	3.224	3.579
Row 177 Names
Presence in List?	0	0	0
Row 178 Mass	365.015	892.944
Row 178 RT	3.334	3.974
Row 178 Names		93857-42-2
Presence in List?	0	1
Row 179 Mass	233.061	1156.94
Row 179 RT	3.315	3.816
Row 179 Names
Presence in List?	0	0
Row 180 Mass	1156.96	1222.95	1288.94
Row 180 RT	3.504	3.552	4.342
Row 180 Names			93857-55-7
Presence in List?	0	0	1
Row 181 Mass	827.028	365.085
Row 181 RT	2.602	4.402
Row 181 Names
Presence in List?	0	0
Row 182 Mass	893.836	1091.81
Row 182 RT	4.929	8.29
Row 182 Names
Presence in List?	0	0
Row 183 Mass	563.958	1091.89
Row 183 RT	3.329	4.768
Row 183 Names
Presence in List?	0	0
Row 184 Mass	1025.95	1223.92
Row 184 RT	4.221	5.511
Row 184 Names
Presence in List?	0	0
Row 185 Mass	894.811	1092.79
Row 185 RT	4.225	4.688
Row 185 Names
Presence in List?	0	0
Row 186 Mass	498.93	432.938	498.93	564.922
Row 186 RT	2.779	3.326	2.965	3.059
Row 186 Names	1763-23-1 927670-12-0		1763-23-1 927670-12-0
Presence in List?	2	0	2	0
Row 187 Mass	696.939	762.931	894.917	1026.9	828.923
Row 187 RT	3.319	3.343	3.446	3.554	3.398
Row 187 Names					34761-47-2
Presence in List?	0	0	0	0	1
Row 188 Mass	696.956	630.96	762.944
Row 188 RT	3.091	3.407	3.497
Row 188 Names			18024-09-4 141074-63-7
Presence in List?	0	0	2
Row 189 Mass	1026.93	433.006	1026.93
Row 189 RT	3.096	5.506	4.077
Row 189 Names
Presence in List?	0	0	0
Row 190 Mass	301.062	1224.95
Row 190 RT	3.077	5.263
Row 190 Names	131294-67-2
Presence in List?	1	0
Row 191 Mass	697.091	1291.02
Row 191 RT	2.474	4.643
Row 191 Names
Presence in List?	0	0
Row 192 Mass	565.836	961.791
Row 192 RT	0.669	5.063
Row 192 Names
Presence in List?	0	0
Row 193 Mass	961.917	499.973
Row 193 RT	3.137	3.396
Row 193 Names
Presence in List?	0	0
Row 194 Mass	1226.75	1094.77
Row 194 RT	5.905	6.696
Row 194 Names
Presence in List?	0	0
Row 195 Mass	962.795	1160.77	962.795
Row 195 RT	5.5	9.023	5.251
Row 195 Names
Presence in List?	0	0	0
Row 196 Mass	764.899	962.873
Row 196 RT	3.451	4.387
Row 196 Names
Presence in List?	0	0
Row 197 Mass	236.995	368.977	368.976	896.909	962.9	1028.89
Row 197 RT	2.835	2.849	3.278	3.578	3.667	3.744
Row 197 Names		375-83-7	375-83-7
Presence in List?	0	1	1	0	0	0
Row 198 Mass	302.994	1160.89
Row 198 RT	0.703	3.556
Row 198 Names		13140-24-4
Presence in List?	0	1
Row 199 Mass	830.947	962.93
Row 199 RT	3.732	3.876
Row 199 Names		133921-38-7
Presence in List?	0	1
Row 200 Mass	1226.91	896.952	1028.94
Row 200 RT	3.283	3.336	3.433
Row 200 Names
Presence in List?	0	0	0
Row 201 Mass	1028.97	1094.96	1160.95	1358.93	1226.95
Row 201 RT	3.576	3.673	3.756	4.147	3.878
Row 201 Names
Presence in List?	0	0	0	0	0
Row 202 Mass	237.077	303.066	237.077
Row 202 RT	0.745	4.051	1.685
Row 202 Names
Presence in List?	0	0	0
Row 203 Mass	1028.99	237.092
Row 203 RT	2.873	3.22
Row 203 Names
Presence in List?	0	0
Row 204 Mass	897.978	963.97
Row 204 RT	3.486	4.636
Row 204 Names
Presence in List?	0	0
Row 205 Mass	700.084	1294.01
Row 205 RT	3.529	5.753
Row 205 Names
Presence in List?	0	0
Row 206 Mass	1162.75	1096.76	1162.75
Row 206 RT	6.723	7.067	5.59
Row 206 Names
Presence in List?	0	0	0
Row 207 Mass	766.912	436.949
Row 207 RT	2.807	3.166
Row 207 Names
Presence in List?	0	0
Row 208 Mass	107.017	107.017	898.917
Row 208 RT	3.947	5.319	2.844
Row 208 Names
Presence in List?	0	0	0
Row 209 Mass	1162.93	1294.91	1228.92	766.977	1360.9
Row 209 RT	3.534	3.661	3.569	3.356	3.719
Row 209 Names
Presence in List?	0	0	0	0	0
Row 210 Mass	635.018	832.99
Row 210 RT	2.62	3.372
Row 210 Names
Presence in List?	0	0
Row 211 Mass	767.039	503.076
Row 211 RT	2.72	4.373
Row 211 Names
Presence in List?	0	0
Row 212 Mass	1097.95	1163.94
Row 212 RT	3.155	3.197
Row 212 Names
Presence in List?	0	0
Row 213 Mass	1164.76	1230.75
Row 213 RT	5.651	7.724
Row 213 Names
Presence in List?	0	0
Row 214 Mass	900.907	1164.87	966.899	636.94
Row 214 RT	2.936	3.195	3.013	3.25
Row 214 Names	40143-79-1
Presence in List?	1	0	0	0
Row 215 Mass	768.951	636.969	1230.9
Row 215 RT	3.563	3.693	3.942
Row 215 Names
Presence in List?	0	0	0
Row 216 Mass	373.045	1296.93	1362.92
Row 216 RT	4.003	4.234	4.424
Row 216 Names
Presence in List?	0	0	0
Row 217 Mass	703.03	1164.97	307.077
Row 217 RT	3.366	3.706	3.882
Row 217 Names
Presence in List?	0	0	0
Row 218 Mass	242.082	836.005	440.057	440.056
Row 218 RT	3.07	3.338	4.231	4.477
Row 218 Names
Presence in List?	0	0	0	0
Row 219 Mass	836.77	1034.75
Row 219 RT	3.91	6.045
Row 219 Names
Presence in List?	0	0
Row 220 Mass	968.864	968.863	1034.85	1232.83
Row 220 RT	4.295	4.124	4.729	9.518
Row 220 Names
Presence in List?	0	0	0	0
Row 221 Mass	638.953	1232.88	638.952	770.939	968.914	1034.91	1100.9	1166.89	770.939	836.931	902.923
Row 221 RT	2.294	3.533	2.447	3.043	3.356	3.406	3.452	3.513	3.176	3.244	3.305
Row 221 Names	87405-74-1		87405-74-1
Presence in List?	1	0	1	0	0	0	0	0	0	0	0
Row 222 Mass	440.997	638.968	770.956
Row 222 RT	3.145	3.338	3.353
Row 222 Names	3108-24-5 812-70-4
Presence in List?	2	0	0
Row 223 Mass	1166.92	1364.9	1298.91	375.02
Row 223 RT	3.832	4.218	4.077	2.961
Row 223 Names
Presence in List?	0	0	0	0
Row 224 Mass	177.056	968.954	968.96
Row 224 RT	1.891	3.613	3.729
Row 224 Names
Presence in List?	0	0	0
Row 225 Mass	243.066	441.04
Row 225 RT	2.417	2.948
Row 225 Names		267648-90-8
Presence in List?	0	1
Row 226 Mass	243.082	968.986
Row 226 RT	3.349	2.853
Row 226 Names
Presence in List?	0	0
Row 227 Mass	1233.01	1299	1364.99
Row 227 RT	3.727	3.855	3.956
Row 227 Names
Presence in List?	0	0	0
Row 228 Mass	771.952	1101.91	1101.91	1101.91
Row 228 RT	3.939	5.527	5.705	5.919
Row 228 Names
Presence in List?	0	0	0	0
Row 229 Mass	705.986	1233.92
Row 229 RT	3.283	3.944
Row 229 Names
Presence in List?	0	0
Row 230 Mass	310.904	244.908
Row 230 RT	0.66	2.389
Row 230 Names
Presence in List?	0	0
Row 231 Mass	772.866	1168.82	1168.82
Row 231 RT	3.373	7.242	7.452
Row 231 Names
Presence in List?	0	0	0
Row 232 Mass	706.895	904.868
Row 232 RT	3.403	8.939
Row 232 Names
Presence in List?	0	0
Row 233 Mass	838.89	970.875
Row 233 RT	2.857	4.434
Row 233 Names
Presence in List?	0	0
Row 234 Mass	772.919	838.912
Row 234 RT	3.28	3.338
Row 234 Names
Presence in List?	0	0
Row 235 Mass	179.01	574.957	442.972	442.972	706.935
Row 235 RT	1.934	3.257	3.379	3.832	3.227
Row 235 Names		330562-42-0	55009-88-6 57678-01-0 220369-95-9	55009-88-6 57678-01-0 220369-95-9
Presence in List?	0	1	3	3	0
Row 236 Mass	1300.88	1366.87
Row 236 RT	3.581	3.659
Row 236 Names	63225-54-7
Presence in List?	1	0
Row 237 Mass	508.996	838.953	838.954	179.035
Row 237 RT	3.154	3.641	3.74	1.96
Row 237 Names
Presence in List?	0	0	0	0
Row 238 Mass	970.945	640.984	574.996
Row 238 RT	3.052	3.511	3.369
Row 238 Names		158607-41-1	38565-54-7
Presence in List?	0	1	1
Row 239 Mass	179.056	1036.95	1234.93
Row 239 RT	4.73	4.764	4.846
Row 239 Names
Presence in List?	0	0	0
Row 240 Mass	245.061	245.061	1366.92
Row 240 RT	3.045	3.152	4.518
Row 240 Names
Presence in List?	0	0	0
Row 241 Mass	377.066	1102.98	970.995
Row 241 RT	2.601	3.622	4.178
Row 241 Names		67939-93-9
Presence in List?	0	1	0
Row 242 Mass	905.046	1169.01
Row 242 RT	3.145	4.966
Row 242 Names
Presence in List?	0	0
Row 243 Mass	1104.75	1038.75
Row 243 RT	3.421	3.441
Row 243 Names
Presence in List?	0	0
Row 244 Mass	642.949	1038.9	1104.89	1170.88	1236.87
Row 244 RT	3.236	3.476	3.537	3.584	3.668
Row 244 Names
Presence in List?	0	0	0	0	0
Row 245 Mass	181.036	181.036	774.957	181.036	181.036
Row 245 RT	3.948	4.28	3.042	4.723	7.189
Row 245 Names
Presence in List?	0	0	0	0	0
Row 246 Mass	115.076	181.067	1104.95	1038.96
Row 246 RT	1.972	2.449	3.7	7.846
Row 246 Names
Presence in List?	0	0	0	0
Row 247 Mass	1302.94	1170.95	1302.94
Row 247 RT	3.28	4.164	3.37
Row 247 Names
Presence in List?	0	0	0
Row 248 Mass	973.005	1302.96
Row 248 RT	2.844	3.958
Row 248 Names
Presence in List?	0	0
Row 249 Mass	511.075	445.084
Row 249 RT	3.479	3.862
Row 249 Names	34455-22-6
Presence in List?	1	0
Row 250 Mass	907.912	973.908
Row 250 RT	3.395	3.42
Row 250 Names
Presence in List?	0	0
Row 251 Mass	182.021	775.947
Row 251 RT	2.247	3.554
Row 251 Names
Presence in List?	0	0
Row 252 Mass	907.969	841.974
Row 252 RT	3.314	3.943
Row 252 Names
Presence in List?	0	0
Row 253 Mass	644.797	974.757
Row 253 RT	0.661	3.942
Row 253 Names
Presence in List?	0	0
Row 254 Mass	974.794	1172.77	1172.77
Row 254 RT	4.705	8.467	8.764
Row 254 Names
Presence in List?	0	0	0
Row 255 Mass	1106.8	908.827
Row 255 RT	6.081	7.007
Row 255 Names
Presence in List?	0	0
Row 256 Mass	248.973	1040.87	248.974
Row 256 RT	3.325	3.426	3.425
Row 256 Names	72804-49-0 21581-82-8 376-77-2 376-87-4		72804-49-0 21581-82-8 376-77-2 376-87-4
Presence in List?	4	0	4
Row 257 Mass	710.932	512.96	512.96	446.968	710.931
Row 257 RT	2.429	2.909	3.093	3.1	2.58
Row 257 Names		335-76-2 172155-07-6 19547-30-9	335-76-2 172155-07-6 19547-30-9
Presence in List?	0	3	3	0	0
Row 258 Mass	644.959	842.936
Row 258 RT	3.331	3.549
Row 258 Names
Presence in List?	0	0
Row 259 Mass	908.943	1238.9
Row 259 RT	2.843	3.528
Row 259 Names
Presence in List?	0	0
Row 260 Mass	249.056	908.978
Row 260 RT	3.18	4.611
Row 260 Names
Presence in List?	0	0
Row 261 Mass	1040.97	1106.96	1172.95	1304.94	1370.93	1304.94
Row 261 RT	3.408	3.448	3.531	3.663	3.701	4.151
Row 261 Names
Presence in List?	0	0	0	0	0	0
Row 262 Mass	1370.94	1238.96
Row 262 RT	4.924	5.303
Row 262 Names
Presence in List?	0	0
Row 263 Mass	909.015	975.004
Row 263 RT	3.369	3.922
Row 263 Names
Presence in List?	0	0
Row 264 Mass	1173.04	1371.01	1371.01
Row 264 RT	4.772	4.928	5.9
Row 264 Names
Presence in List?	0	0	0
Row 265 Mass	1371.97	1239.99
Row 265 RT	4.031	5.642
Row 265 Names
Presence in List?	0	0
Row 266 Mass	646.871	1108.82
Row 266 RT	3.244	7.24
Row 266 Names
Presence in List?	0	0
Row 267 Mass	316.983	910.908	646.942	712.934	250.987	580.949
Row 267 RT	3.143	3.464	3.301	3.31	1.26	3.092
Row 267 Names	153817-18-6
Presence in List?	1	0	0	0	0	0
Row 268 Mass	580.963	646.954	712.947
Row 268 RT	3.339	3.427	3.42
Row 268 Names	610778-18-2	14620-81-6	376-06-7
Presence in List?	1	1	1
Row 269 Mass	251.981	1307.85
Row 269 RT	3.313	3.543
Row 269 Names
Presence in List?	0	0
Row 270 Mass	846.79	1110.76
Row 270 RT	4.294	6.471
Row 270 Names
Presence in List?	0	0
Row 271 Mass	1176.77	1110.78	1110.78	1176.77	1176.77
Row 271 RT	5.929	8.181	8.463	6.084	7.051
Row 271 Names
Presence in List?	0	0	0	0	0
Row 272 Mass	318.98	780.922	846.912	912.902	978.893
Row 272 RT	2.685	3.525	3.54	3.603	3.692
Row 272 Names	355-37-3 1998-67-0 30320-28-6
Presence in List?	3	0	0	0	0
Row 273 Mass	121.03	1374.87	780.95	912.934
Row 273 RT	0.609	3.352	3.649	3.743
Row 273 Names				16517-11-6
Presence in List?	0	0	0	1
Row 274 Mass	1176.92	1242.91	1044.93
Row 274 RT	3.26	3.283	3.682
Row 274 Names
Presence in List?	0	0	0
Row 275 Mass	1110.96	1374.92	1242.94
Row 275 RT	3.701	3.927	3.713
Row 275 Names
Presence in List?	0	0	0
Row 276 Mass	913.011	847.015
Row 276 RT	4.16	3.44
Row 276 Names
Presence in List?	0	0
Row 277 Mass	979.071	1309.03
Row 277 RT	3.175	4.836
Row 277 Names
Presence in List?	0	0
Row 278 Mass	319.884	979.797
Row 278 RT	3.914	5.123
Row 278 Names
Presence in List?	0	0
Row 279 Mass	452.874	1178.78
Row 279 RT	0.617	7.233
Row 279 Names
Presence in List?	0	0
Row 280 Mass	320.955	188.972
Row 280 RT	0.66	0.746
Row 280 Names
Presence in List?	0	0
Row 281 Mass	848.92	650.942	123.012
Row 281 RT	2.85	3.455	7.19
Row 281 Names
Presence in List?	0	0	0
Row 282 Mass	1112.93	1310.91	1376.9	782.974	1310.9
Row 282 RT	3.504	3.681	3.742	3.967	3.567
Row 282 Names
Presence in List?	0	0	0	0	0
Row 283 Mass	519.849	783.818
Row 283 RT	0.762	3.505
Row 283 Names
Presence in List?	0	0
Row 284 Mass	321.888	1179.78
Row 284 RT	3.628	7.045
Row 284 Names
Presence in List?	0	0
Row 285 Mass	1048.76	1048.76	1048.76	1048.76	718.802
Row 285 RT	4.716	4.82	6.265	6.699	0.646
Row 285 Names
Presence in List?	0	0	0	0	0
Row 286 Mass	850.91	1114.88	784.918	850.91	916.902	982.894
Row 286 RT	2.798	3.16	2.806	2.888	2.967	3.039
Row 286 Names
Presence in List?	0	0	0	0	0	0
Row 287 Mass	1048.91	718.954
Row 287 RT	3.095	3.494
Row 287 Names		66577-33-1
Presence in List?	0	1
Row 288 Mass	850.945	916.939	1048.92	1180.91
Row 288 RT	3.366	3.425	3.546	3.679
Row 288 Names
Presence in List?	0	0	0	0
Row 289 Mass	719.001	1378.92	850.98
Row 289 RT	4.008	4.496	3.698
Row 289 Names
Presence in List?	0	0	0
Row 290 Mass	653.019	785	784.999
Row 290 RT	0.666	3.542	4.823
Row 290 Names
Presence in List?	0	0	0
Row 291 Mass	653.9	389.937
Row 291 RT	2.975	3.951
Row 291 Names
Presence in List?	0	0
Row 292 Mass	192.96	1248.82
Row 292 RT	0.65	3.437
Row 292 Names
Presence in List?	0	0
Row 293 Mass	984.882	522.941
Row 293 RT	2.982	3.029
Row 293 Names
Presence in List?	0	0
Row 294 Mass	522.959	786.924	456.968
Row 294 RT	3.499	3.867	4.251
Row 294 Names			147874-76-8 70887-84-2
Presence in List?	0	0	2
Row 295 Mass	720.943	786.934	852.926	918.917	984.909	1050.9
Row 295 RT	3.159	3.2	3.266	3.324	3.373	3.42
Row 295 Names
Presence in List?	0	0	0	0	0	0
Row 296 Mass	588.972	456.989
Row 296 RT	3.339	3.34
Row 296 Names
Presence in List?	0	0
Row 297 Mass	720.966	918.94	1182.91	1248.9
Row 297 RT	3.639	3.873	4.83	3.279
Row 297 Names
Presence in List?	0	0	0	0
Row 298 Mass	786.969	1248.91	1314.9	1380.89	1248.91	1314.9	918.954	984.945	1050.94	1116.93	1182.92
Row 298 RT	3.35	3.721	3.84	3.92	3.993	4.139	3.514	3.576	3.666	3.751	3.872
Row 298 Names
Presence in List?	0	0	0	0	0	0	0	0	0	0	0
Row 299 Mass	193.051	786.981
Row 299 RT	1.997	3.7
Row 299 Names
Presence in List?	0	0
Row 300 Mass	259.077	721.017
Row 300 RT	3.367	3.851
Row 300 Names
Presence in List?	0	0
Row 301 Mass	1183.01	985.034	1380.99
Row 301 RT	3.681	3.922	4
Row 301 Names
Presence in List?	0	0	0
Row 302 Mass	325.928	259.934	259.934
Row 302 RT	0.647	0.728	0.623
Row 302 Names
Presence in List?	0	0	0
Row 303 Mass	590.909	920.863	920.863
Row 303 RT	3.336	3.917	8.935
Row 303 Names
Presence in List?	0	0	0
Row 304 Mass	260.991	788.923	854.911
Row 304 RT	3.011	3.298	3.343
Row 304 Names	679-53-8
Presence in List?	1	0	0
Row 305 Mass	986.913	392.985
Row 305 RT	0.663	2.531
Row 305 Names
Presence in List?	0	0
Row 306 Mass	656.96	1316.88	1118.9	1184.89	1250.89	1382.87
Row 306 RT	3.397	3.612	3.45	3.501	3.552	3.687
Row 306 Names
Presence in List?	0	0	0	0	0	0
Row 307 Mass	590.988	656.976
Row 307 RT	3.421	3.694
Row 307 Names
Presence in List?	0	0
Row 308 Mass	195.045	393.016	788.975	788.975	788.975	788.974
Row 308 RT	2.721	3.961	3.381	4.172	4.976	6.599
Row 308 Names		107650-06-6 54336-60-6	57677-95-9	57677-95-9 57677-95-9 57677-95-9	57677-95-9	57677-95-9
Presence in List?	0	2	1	3	1	1
Row 309 Mass	986.975	1118.96
Row 309 RT	2.98	4.206
Row 309 Names
Presence in List?	0	0
Row 310 Mass	1052.98	1184.96
Row 310 RT	3.56	3.215
Row 310 Names
Presence in List?	0	0
Row 311 Mass	855.014	1250.96	261.092
Row 311 RT	3.29	3.884	3.633
Row 311 Names
Presence in List?	0	0	0
Row 312 Mass	1185	657.066
Row 312 RT	2.951	3.335
Row 312 Names
Presence in List?	0	0
Row 313 Mass	591.086	1317
Row 313 RT	3.717	6.936
Row 313 Names
Presence in List?	0	0
Row 314 Mass	525.84	327.866
Row 314 RT	0.648	3.47
Row 314 Names
Presence in List?	0	0
Row 315 Mass	195.907	987.807	1119.79	987.808
Row 315 RT	0.633	5.331	4.291	5.033
Row 315 Names
Presence in List?	0	0	0	0
Row 316 Mass	525.941	1119.86
Row 316 RT	3.042	5.503
Row 316 Names
Presence in List?	0	0
Row 317 Mass	921.939	1119.92
Row 317 RT	3.977	5.492
Row 317 Names
Presence in List?	0	0
Row 318 Mass	1053.93	1119.93
Row 318 RT	3.145	3.162
Row 318 Names
Presence in List?	0	0
Row 319 Mass	1383.96	856.029
Row 319 RT	2.992	3.13
Row 319 Names
Presence in List?	0	0
Row 320 Mass	592.87	1186.79
Row 320 RT	3.526	6.07
Row 320 Names
Presence in List?	0	0
Row 321 Mass	922.846	1120.82
Row 321 RT	3.938	5.378
Row 321 Names
Presence in List?	0	0
Row 322 Mass	460.933	922.879
Row 322 RT	2.827	4.303
Row 322 Names	646-83-3 1135682-88-0
Presence in List?	2	0
Row 323 Mass	394.961	196.984	262.976	1120.87
Row 323 RT	1.702	2.159	2.162	5.317
Row 323 Names	89608-32-2 171182-86-8 118334-94-4	375-02-0	2706-90-3
Presence in List?	3	1	1	0
Row 324 Mass	460.962	790.918
Row 324 RT	4.253	3.867
Row 324 Names	306-94-5
Presence in List?	1	0
Row 325 Mass	394.976	856.917	922.909	988.9	1054.89	1120.88	658.945	724.941
Row 325 RT	2.339	3.335	3.388	3.441	3.504	3.555	3.236	3.44
Row 325 Names	13973-14-3 308-45-2	61097-98-1
Presence in List?	2	1	0	0	0	0	0	0
Row 326 Mass	592.964	1318.87	592.963
Row 326 RT	3.157	3.309	3.4
Row 326 Names	78974-42-2		78974-42-2
Presence in List?	1	0	1
Row 327 Mass	988.932	1384.88	856.947
Row 327 RT	3.059	3.369	3.725
Row 327 Names
Presence in List?	0	0	0
Row 328 Mass	1120.92	1252.9	790.965
Row 328 RT	3.954	4.236	3.975
Row 328 Names
Presence in List?	0	0	0
Row 329 Mass	263.056	197.061	988.962	988.962
Row 329 RT	1.906	3.119	3.622	5.516
Row 329 Names			678-41-1 678-41-1 678-41-1	678-41-1
Presence in List?	0	0	3	1
Row 330 Mass	989.822	1253.79
Row 330 RT	5.683	8.941
Row 330 Names
Presence in List?	0	0
Row 331 Mass	263.962	1055.87
Row 331 RT	3.336	5.729
Row 331 Names
Presence in List?	0	0

## Sheet: Table S6
Filename: C:\Users\Boris\Desktop\07_Huegelsheim_MeOH_20Inj.xls, compared with: OECD_PFAS_curated_Nikiforos Alygizakis.xls, mass of repeating unit [Da]: 115.9885, Tolerance [Da]: 0.005
Row 1 Mass	928.795	1160.77
Row 1 RT	4.105	9.023
Row 1 Names
Presence in List?	0	0
Row 2 Mass	696.939	812.927	580.949
Row 2 RT	3.319	3.386	3.092
Row 2 Names
Presence in List?	0	0	0
Row 3 Mass	696.956	580.963	812.941
Row 3 RT	3.091	3.339	3.564
Row 3 Names		610778-18-2	67905-19-5 141977-66-4
Presence in List?	0	1	2
Row 4 Mass	464.994	1044.93
Row 4 RT	3.135	3.682
Row 4 Names	142083-52-1
Presence in List?	1	0
Row 5 Mass	349.034	928.974	1160.95	1276.94	1392.93
Row 5 RT	3.323	3.54	3.756	3.95	4.172
Row 5 Names	87461-68-5 83846-71-3
Presence in List?	2	0	0	0	0
Row 6 Mass	930.953	1162.93	1278.92	1046.94
Row 6 RT	3.346	3.534	3.647	3.43
Row 6 Names
Presence in List?	0	0	0	0
Row 7 Mass	699.897	1047.86	1047.87
Row 7 RT	3.439	4.82	5.5
Row 7 Names	67939-42-8
Presence in List?	1	0	0
Row 8 Mass	352.905	1164.82	1164.82
Row 8 RT	3.247	11.08	11.523
Row 8 Names	203929-12-8
Presence in List?	1	0	0
Row 9 Mass	932.896	1164.87	1396.85
Row 9 RT	2.997	3.195	3.323
Row 9 Names
Presence in List?	0	0	0
Row 10 Mass	468.97	1048.91
Row 10 RT	3.096	3.095
Row 10 Names	375-94-0
Presence in List?	1	0
Row 11 Mass	932.934	1048.92	1396.89
Row 11 RT	3.304	3.546	3.961
Row 11 Names
Presence in List?	0	0	0
Row 12 Mass	121.03	816.957
Row 12 RT	0.609	0.654
Row 12 Names
Presence in List?	0	0
Row 13 Mass	237.077	933.006	237.077
Row 13 RT	0.745	3.381	1.685
Row 13 Names
Presence in List?	0	0	0
Row 14 Mass	585.057	237.092
Row 14 RT	0.761	3.22
Row 14 Names
Presence in List?	0	0
Row 15 Mass	353.845	1165.77
Row 15 RT	4.342	6.158
Row 15 Names
Presence in List?	0	0
Row 16 Mass	1281.97	1397.96	1281.97	1281.97
Row 16 RT	3.494	4.937	4.863	5.073
Row 16 Names
Presence in List?	0	0	0	0
Row 17 Mass	1050.9	934.91	1166.89	1282.88
Row 17 RT	3.42	3.431	3.513	3.586
Row 17 Names
Presence in List?	0	0	0	0
Row 18 Mass	818.947	123.012
Row 18 RT	3.657	7.19
Row 18 Names
Presence in List?	0	0
Row 19 Mass	934.948	1050.94	1166.92	1282.91
Row 19 RT	3.54	3.666	3.832	4.023
Row 19 Names
Presence in List?	0	0	0	0
Row 20 Mass	471.067	1282.99	1282.99
Row 20 RT	0.775	5.509	5.315
Row 20 Names
Presence in List?	0	0	0
Row 21 Mass	239.975	1283.87
Row 21 RT	2.892	3.373
Row 21 Names
Presence in List?	0	0
Row 22 Mass	356.995	588.972
Row 22 RT	3.141	3.339
Row 22 Names	79851-29-9 243128-40-7 28793-36-4
Presence in List?	3	0
Row 23 Mass	936.977	241.051
Row 23 RT	2.852	3.189
Row 23 Names		425-21-8 883543-64-4 423-43-8
Presence in List?	0	3
Row 24 Mass	706.769	590.776
Row 24 RT	3.316	5.235
Row 24 Names
Presence in List?	0	0
Row 25 Mass	590.909	706.895
Row 25 RT	3.336	3.403
Row 25 Names
Presence in List?	0	0
Row 26 Mass	822.895	938.884
Row 26 RT	2.831	2.954
Row 26 Names
Presence in List?	0	0
Row 27 Mass	822.916	938.904	1054.89	1170.88	1286.87
Row 27 RT	3.323	3.409	3.504	3.584	3.708
Row 27 Names
Presence in List?	0	0	0	0	0
Row 28 Mass	358.965	706.935
Row 28 RT	2.31	3.227
Row 28 Names	1606997-42-5
Presence in List?	1	0
Row 29 Mass	707.001	1170.95
Row 29 RT	3.754	4.164
Row 29 Names
Presence in List?	0	0
Row 30 Mass	939.877	1055.87
Row 30 RT	4.518	5.729
Row 30 Names
Presence in List?	0	0
Row 31 Mass	940.795	1172.77	1172.77
Row 31 RT	4.122	8.467	8.764
Row 31 Names
Presence in List?	0	0	0
Row 32 Mass	244.908	592.87
Row 32 RT	2.389	3.526
Row 32 Names
Presence in List?	0	0
Row 33 Mass	1056.97	1172.95	1288.94
Row 33 RT	3.427	3.531	4.342
Row 33 Names			93857-55-7
Presence in List?	0	0	1
Row 34 Mass	710.932	362.97	710.931
Row 34 RT	2.429	2.686	2.58
Row 34 Names		375-85-9 15899-29-3 922168-41-0 19108-37-3
Presence in List?	0	4	0
Row 35 Mass	826.939	594.962	942.931	826.942
Row 35 RT	2.849	3.249	3.706	3.579
Row 35 Names
Presence in List?	0	0	0	0
Row 36 Mass	247.032	1174.94
Row 36 RT	2.802	3.676
Row 36 Names
Presence in List?	0	0
Row 37 Mass	363.961	479.95
Row 37 RT	2.988	3.172
Row 37 Names
Presence in List?	0	0
Row 38 Mass	712.934	828.923	1060.9
Row 38 RT	3.31	3.398	5.743
Row 38 Names		34761-47-2
Presence in List?	0	1	0
Row 39 Mass	480.972	712.947	944.922	480.971	480.97	596.955	480.97
Row 39 RT	2.823	3.42	3.499	2.942	3.169	3.351	3.369
Row 39 Names	14548-74-4	376-06-7		14548-74-4	14548-74-4		14548-74-4
Presence in List?	1	1	0	1	1	0	1
Row 40 Mass	249.056	1292.95
Row 40 RT	3.18	3.992
Row 40 Names
Presence in List?	0	0
Row 41 Mass	482.935	598.923	482.935
Row 41 RT	3.033	3.17	3.224
Row 41 Names	647-29-0	335-77-3	647-29-0
Presence in List?	1	1	1
Row 42 Mass	946.94	830.947
Row 42 RT	3.129	3.732
Row 42 Names
Presence in List?	0	0
Row 43 Mass	946.948	1062.94	1178.92	1294.91
Row 43 RT	3.371	3.446	3.545	3.661
Row 43 Names
Presence in List?	0	0	0	0
Row 44 Mass	136.017	1179.91
Row 44 RT	1.643	4.827
Row 44 Names
Presence in List?	0	0
Row 45 Mass	1179.95	947.975
Row 45 RT	3.237	4.53
Row 45 Names
Presence in List?	0	0
Row 46 Mass	948.906	1064.9
Row 46 RT	3.004	3.101
Row 46 Names
Presence in List?	0	0
Row 47 Mass	368.977	948.915	368.976
Row 47 RT	2.849	2.856	3.278
Row 47 Names	375-83-7	37486-69-4	375-83-7
Presence in List?	1	1	1
Row 48 Mass	1180.91	948.93
Row 48 RT	3.679	11.929
Row 48 Names
Presence in List?	0	0
Row 49 Mass	716.985	1296.93
Row 49 RT	3.34	4.234
Row 49 Names
Presence in List?	0	0
Row 50 Mass	833.907	949.897
Row 50 RT	2.879	8.949
Row 50 Names
Presence in List?	0	0
Row 51 Mass	486.017	1297.93
Row 51 RT	8.543	3.409
Row 51 Names
Presence in List?	0	0
Row 52 Mass	718.954	1182.91	486.978	486.978
Row 52 RT	3.494	4.83	3.883	4.185
Row 52 Names	66577-33-1
Presence in List?	1	0	0	0
Row 53 Mass	1066.93	1298.91	1182.92
Row 53 RT	3.698	4.077	3.872
Row 53 Names
Presence in List?	0	0	0
Row 54 Mass	719.001	487.02
Row 54 RT	4.008	8.348
Row 54 Names		125370-60-7
Presence in List?	0	1
Row 55 Mass	1183.01	1299
Row 55 RT	3.681	3.855
Row 55 Names
Presence in List?	0	0
Row 56 Mass	371.994	1299.9
Row 56 RT	3.92	12.873
Row 56 Names
Presence in List?	0	0
Row 57 Mass	720.943	836.931	952.92	1068.91	1184.89	1300.88	604.955
Row 57 RT	3.159	3.244	3.336	3.417	3.501	3.581	3.45
Row 57 Names						63225-54-7
Presence in List?	0	0	0	0	0	1	0
Row 58 Mass	257.045	952.975
Row 58 RT	1.789	3.068
Row 58 Names		1233312-87-2
Presence in List?	0	1
Row 59 Mass	1184.96	373.045
Row 59 RT	3.215	4.003
Row 59 Names
Presence in List?	0	0
Row 60 Mass	838.912	954.899	1070.89
Row 60 RT	3.338	3.426	3.523
Row 60 Names
Presence in List?	0	0	0
Row 61 Mass	838.947	1070.92
Row 61 RT	3.551	3.874
Row 61 Names
Presence in List?	0	0
Row 62 Mass	375.02	606.998
Row 62 RT	2.961	3.126
Row 62 Names		918-32-1 755-53-3
Presence in List?	0	2
Row 63 Mass	1302.96	1070.99	1070.99
Row 63 RT	3.958	4.575	4.776
Row 63 Names
Presence in List?	0	0	0
Row 64 Mass	259.934	1071.86	259.934
Row 64 RT	0.623	5.324	0.728
Row 64 Names
Presence in List?	0	0	0
Row 65 Mass	724.859	1188.81
Row 65 RT	3.23	7.236
Row 65 Names
Presence in List?	0	0
Row 66 Mass	260.991	724.941
Row 66 RT	3.011	3.44
Row 66 Names	679-53-8
Presence in List?	1	0
Row 67 Mass	608.978	956.943
Row 67 RT	3.549	3.977
Row 67 Names		42977-21-9
Presence in List?	0	1
Row 68 Mass	1188.95	1304.94	1304.94	1188.95
Row 68 RT	4.045	4.151	3.663	6.388
Row 68 Names	1895-26-7			1895-26-7
Presence in List?	1	0	0	1
Row 69 Mass	377.066	1304.97	145.087
Row 69 RT	2.601	3.906	1.613
Row 69 Names
Presence in List?	0	0	0
Row 70 Mass	493.068	261.092
Row 70 RT	3.559	3.633
Row 70 Names
Presence in List?	0	0
Row 71 Mass	610.826	1074.78	1074.78	1074.78	1074.78
Row 71 RT	3.617	4.833	4.938	6.486	6.946
Row 71 Names
Presence in List?	0	0	0	0	0
Row 72 Mass	494.973	842.936
Row 72 RT	2.827	3.549
Row 72 Names	320599-24-4
Presence in List?	1	0
Row 73 Mass	844.92	728.929	728.929	1076.9
Row 73 RT	3.419	3.53	3.335	5.715
Row 73 Names
Presence in List?	0	0	0	0
Row 74 Mass	265.003	149.01	149.01	149.01	149.01
Row 74 RT	1.706	3.946	4.281	4.723	7.187
Row 74 Names
Presence in List?	0	0	0	0	0
Row 75 Mass	497.087	1309	1309
Row 75 RT	2.959	5.503	5.681
Row 75 Names
Presence in List?	0	0	0
Row 76 Mass	961.744	845.756
Row 76 RT	3.933	5.555
Row 76 Names
Presence in List?	0	0
Row 77 Mass	846.912	962.9
Row 77 RT	3.54	3.667
Row 77 Names
Presence in List?	0	0
Row 78 Mass	730.95	962.93
Row 78 RT	3.55	3.876
Row 78 Names		133921-38-7
Presence in List?	0	1
Row 79 Mass	1078.93	1194.92	1310.91
Row 79 RT	3.468	3.561	3.681
Row 79 Names
Presence in List?	0	0	0
Row 80 Mass	152.035	615.99
Row 80 RT	2.323	3.24
Row 80 Names
Presence in List?	0	0
Row 81 Mass	616.009	963.97
Row 81 RT	3.455	4.636
Row 81 Names
Presence in List?	0	0
Row 82 Mass	269.045	732.996	269.045	269.046
Row 82 RT	2.609	3.285	2.743	3.413
Row 82 Names	88021-93-6 25600-64-0 424-66-8 1559-07-5 2926-44-5 136909-75-6 425-24-1		88021-93-6 25600-64-0 424-66-8 1559-07-5 2926-44-5 136909-75-6 425-24-1	88021-93-6 25600-64-0 424-66-8 1559-07-5 2926-44-5 136909-75-6 425-24-1
Presence in List?	7	0	7	7
Row 83 Mass	734.922	850.91	850.91	966.899
Row 83 RT	2.727	2.798	2.888	3.013
Row 83 Names
Presence in List?	0	0	0	0
Row 84 Mass	618.96	734.95
Row 84 RT	3.354	3.539
Row 84 Names	66563-68-6
Presence in List?	1	0
Row 85 Mass	850.945	1314.9	966.935	1082.92	1198.91	1314.9	1198.91
Row 85 RT	3.366	3.84	3.453	3.554	3.678	4.139	3.914
Row 85 Names
Presence in List?	0	0	0	0	0	0	0
Row 86 Mass	734.997	850.98
Row 86 RT	3.374	3.698
Row 86 Names
Presence in List?	0	0
Row 87 Mass	852.926	1084.9	1200.89	1316.88	968.914
Row 87 RT	3.266	3.435	3.522	3.612	3.356
Row 87 Names
Presence in List?	0	0	0	0	0
Row 88 Mass	736.976	968.954
Row 88 RT	3.551	3.613
Row 88 Names
Presence in List?	0	0
Row 89 Mass	968.986	273.053	273.055
Row 89 RT	2.853	3.379	3.545
Row 89 Names
Presence in List?	0	0	0
Row 90 Mass	1086.84	1202.82
Row 90 RT	4.454	7.445
Row 90 Names
Presence in List?	0	0
Row 91 Mass	1318.87	854.911	158.979
Row 91 RT	3.309	3.343	0.597
Row 91 Names
Presence in List?	0	0	0
Row 92 Mass	1086.92	1318.89	1086.92
Row 92 RT	3.922	4.422	6.912
Row 92 Names
Presence in List?	0	0	0
Row 93 Mass	1202.97	970.995
Row 93 RT	3.777	4.178
Row 93 Names	2965-52-8
Presence in List?	1	0
Row 94 Mass	855.014	1318.97
Row 94 RT	3.29	3.372
Row 94 Names
Presence in List?	0	0
Row 95 Mass	391.082	1318.99
Row 95 RT	3.168	5.673
Row 95 Names
Presence in List?	0	0
Row 96 Mass	740.928	856.917
Row 96 RT	3.238	3.335
Row 96 Names		61097-98-1
Presence in List?	0	1
Row 97 Mass	392.978	624.953
Row 97 RT	3.044	3.338
Row 97 Names
Presence in List?	0	0
Row 98 Mass	740.978	508.996
Row 98 RT	3.692	3.154
Row 98 Names
Presence in List?	0	0
Row 99 Mass	1204.95	1088.96	1088.96
Row 99 RT	3.342	3.813	5.54
Row 99 Names		78974-41-1 78974-41-1	78974-41-1
Presence in List?	0	2	1
Row 100 Mass	277.075	973.005	393.066
Row 100 RT	2.401	2.844	3.296
Row 100 Names
Presence in List?	0	0	0
Row 101 Mass	973.908	1321.87
Row 101 RT	3.42	3.568
Row 101 Names
Presence in List?	0	0
Row 102 Mass	1089.99	1321.97
Row 102 RT	3.176	3.948
Row 102 Names
Presence in List?	0	0
Row 103 Mass	394.976	278.986	626.954	742.943
Row 103 RT	2.339	3.34	3.303	3.393
Row 103 Names	13973-14-3 308-45-2	34451-25-7	120226-60-0
Presence in List?	2	1	1	0
Row 104 Mass	511.075	627.061
Row 104 RT	3.479	3.662
Row 104 Names	34455-22-6
Presence in List?	1	0
Row 105 Mass	627.807	975.769
Row 105 RT	0.656	4.257
Row 105 Names
Presence in List?	0	0
Row 106 Mass	395.882	1091.81
Row 106 RT	0.664	8.29
Row 106 Names
Presence in List?	0	0
Row 107 Mass	280.983	512.96	512.96	396.971
Row 107 RT	2.331	2.909	3.093	4.567
Row 107 Names	308-24-7 330562-43-1 391199-64-7	335-76-2 172155-07-6 19547-30-9	335-76-2 172155-07-6 19547-30-9	335-60-4 147492-57-7 71302-72-2 103634-36-2
Presence in List?	3	3	3	4
Row 108 Mass	1092.95	165.041	165.041	165.041	165.041	165.041
Row 108 RT	3.305	3.946	4.281	4.724	5.319	7.188
Row 108 Names
Presence in List?	0	0	0	0	0	0
Row 109 Mass	165.056	281.045
Row 109 RT	0.749	3.135
Row 109 Names		40002-62-8 2145-81-5
Presence in List?	0	2
Row 110 Mass	629.824	977.787
Row 110 RT	3.543	4.992
Row 110 Names
Presence in List?	0	0
Row 111 Mass	514.916	746.897
Row 111 RT	2.946	3.451
Row 111 Names
Presence in List?	0	0
Row 112 Mass	630.96	862.936
Row 112 RT	3.407	3.659
Row 112 Names		57475-95-3
Presence in List?	0	1
Row 113 Mass	1210.91	1326.9
Row 113 RT	3.577	3.704
Row 113 Names
Presence in List?	0	0
Row 114 Mass	1094.96	1210.95
Row 114 RT	3.673	3.84
Row 114 Names
Presence in List?	0	0
Row 115 Mass	283.061	167.071	399.046
Row 115 RT	3.02	3.556	4.924
Row 115 Names	156294-55-2		178094-76-3 183873-55-4 183873-56-5
Presence in List?	1	0	3
Row 116 Mass	863.943	1211.91
Row 116 RT	3.302	4.778
Row 116 Names
Presence in List?	0	0
Row 117 Mass	168.03	631.986
Row 117 RT	2.049	3.142
Row 117 Names
Presence in List?	0	0
Row 118 Mass	750.916	1214.87	750.916	866.905	866.905	982.894
Row 118 RT	2.651	3.215	2.774	2.814	2.921	3.039
Row 118 Names
Presence in List?	0	0	0	0	0	0
Row 119 Mass	518.967	634.957
Row 119 RT	3.197	3.412
Row 119 Names	375-97-3
Presence in List?	1	0
Row 120 Mass	984.909	868.919	1100.9	1216.88	1332.87	636.94
Row 120 RT	3.373	3.377	3.452	3.542	3.639	3.25
Row 120 Names
Presence in List?	0	0	0	0	0	0
Row 121 Mass	636.969	868.943
Row 121 RT	3.693	3.747
Row 121 Names
Presence in List?	0	0
Row 122 Mass	868.959	984.945	1216.92	1332.91
Row 122 RT	3.515	3.576	3.897	4.119
Row 122 Names
Presence in List?	0	0	0	0
Row 123 Mass	1332.99	1217
Row 123 RT	5.497	5.928
Row 123 Names
Presence in List?	0	0
Row 124 Mass	1101.91	1333.89	1101.91	1101.91
Row 124 RT	5.527	12.223	5.705	5.919
Row 124 Names
Presence in List?	0	0	0	0
Row 125 Mass	522.959	986.913
Row 125 RT	3.499	0.663
Row 125 Names
Presence in List?	0	0
Row 126 Mass	290.998	638.963	638.968
Row 126 RT	2.82	3.404	3.338
Row 126 Names
Presence in List?	0	0	0
Row 127 Mass	407.03	639.004	1218.95	1218.95
Row 127 RT	2.649	3.156	3.314	3.764
Row 127 Names	142502-76-9 147274-18-8 55427-50-4
Presence in List?	3	0	0	0
Row 128 Mass	1218.97	1102.98	871.001
Row 128 RT	3.237	3.622	3.871
Row 128 Names		67939-93-9
Presence in List?	0	1	0
Row 129 Mass	756.903	872.892	872.891
Row 129 RT	2.72	2.779	2.885
Row 129 Names
Presence in List?	0	0	0
Row 130 Mass	756.925	872.912	988.9	1104.89	1220.88	1336.86
Row 130 RT	3.262	3.358	3.441	3.537	3.642	3.747
Row 130 Names
Presence in List?	0	0	0	0	0	0
Row 131 Mass	988.932	756.954	1336.9
Row 131 RT	3.059	3.548	3.58
Row 131 Names
Presence in List?	0	0	0
Row 132 Mass	988.962	1104.95	988.962
Row 132 RT	3.622	3.7	5.516
Row 132 Names	678-41-1 678-41-1 678-41-1		678-41-1
Presence in List?	3	0	1
Row 133 Mass	177.056	756.997	757.001
Row 133 RT	1.891	3.297	4.049
Row 133 Names
Presence in List?	0	0	0
Row 134 Mass	1105.76	1221.75
Row 134 RT	3.66	5.836
Row 134 Names
Presence in List?	0	0
Row 135 Mass	525.84	641.832
Row 135 RT	0.648	3.295
Row 135 Names
Presence in List?	0	0
Row 136 Mass	1222.81	990.827
Row 136 RT	3.429	5.497
Row 136 Names
Presence in List?	0	0
Row 137 Mass	874.937	642.958	758.945	642.958
Row 137 RT	3.732	3.784	3.325	3.626
Row 137 Names		57678-05-4 563-09-7		57678-05-4 563-09-7
Presence in List?	0	2	0	2
Row 138 Mass	1106.96	1222.95	1338.94	179.056
Row 138 RT	3.448	3.552	3.676	4.73
Row 138 Names
Presence in List?	0	0	0	0
Row 139 Mass	876.936	644.959	992.921
Row 139 RT	2.852	3.331	6.993
Row 139 Names
Presence in List?	0	0	0
Row 140 Mass	1226.75	1110.76
Row 140 RT	5.905	6.471
Row 140 Names
Presence in List?	0	0
Row 141 Mass	182.988	646.942	762.931	878.919
Row 141 RT	2.075	3.301	3.343	3.431
Row 141 Names
Presence in List?	0	0	0	0
Row 142 Mass	530.967	646.954	762.944
Row 142 RT	3.252	3.427	3.497
Row 142 Names		14620-81-6	18024-09-4 141074-63-7
Presence in List?	0	1	2
Row 143 Mass	1226.91	1342.9
Row 143 RT	3.283	3.701
Row 143 Names
Presence in List?	0	0
Row 144 Mass	1110.96	1342.93	1226.95	183.045
Row 144 RT	3.701	4.08	3.878	2.902
Row 144 Names
Presence in List?	0	0	0	0
Row 145 Mass	416.022	1227.95
Row 145 RT	4.513	4.801
Row 145 Names
Presence in List?	0	0
Row 146 Mass	880.957	996.945	1112.93	1228.92
Row 146 RT	3.318	3.401	3.504	3.569
Row 146 Names
Presence in List?	0	0	0	0
Row 147 Mass	766.912	1114.88
Row 147 RT	2.807	3.16
Row 147 Names
Presence in List?	0	0
Row 148 Mass	1230.9	418.974	534.962	418.973
Row 148 RT	3.942	2.793	3.286	2.989
Row 148 Names		335-65-9		335-65-9
Presence in List?	0	1	0	1
Row 149 Mass	1346.92	766.977
Row 149 RT	4.367	3.356
Row 149 Names
Presence in List?	0	0
Row 150 Mass	883.001	998.99	883.001
Row 150 RT	3.544	4.239	3.432
Row 150 Names
Presence in List?	0	0	0
Row 151 Mass	651.969	1347.9
Row 151 RT	3.216	3.554
Row 151 Names
Presence in List?	0	0
Row 152 Mass	304.914	1232.83
Row 152 RT	0.604	9.518
Row 152 Names
Presence in List?	0	0
Row 153 Mass	188.972	536.941
Row 153 RT	0.746	3.339
Row 153 Names
Presence in List?	0	0
Row 154 Mass	536.976	768.951
Row 154 RT	3.511	3.563
Row 154 Names
Presence in List?	0	0
Row 155 Mass	189.022	884.948	1000.94	1116.93	1348.9
Row 155 RT	2.833	3.5	3.612	3.751	4.172
Row 155 Names
Presence in List?	0	0	0	0	0
Row 156 Mass	1233.01	1349	885.04
Row 156 RT	3.727	3.909	3.704
Row 156 Names
Presence in List?	0	0	0
Row 157 Mass	770.939	886.928	1002.92	1118.9	770.939
Row 157 RT	3.043	3.282	3.37	3.45	3.176
Row 157 Names
Presence in List?	0	0	0	0	0
Row 158 Mass	655.007	1118.96	1002.98
Row 158 RT	2.919	4.206	3.546
Row 158 Names
Presence in List?	0	0	0
Row 159 Mass	1002.98	771.005
Row 159 RT	3.071	3.645
Row 159 Names	67939-92-8	129838-41-1
Presence in List?	1	1
Row 160 Mass	307.077	655.04
Row 160 RT	3.882	3.938
Row 160 Names
Presence in List?	0	0
Row 161 Mass	1119.79	1003.81
Row 161 RT	4.291	4.931
Row 161 Names
Presence in List?	0	0
Row 162 Mass	423.872	1119.81
Row 162 RT	0.639	4.665
Row 162 Names
Presence in List?	0	0
Row 163 Mass	771.952	1119.92
Row 163 RT	3.939	5.492
Row 163 Names
Presence in List?	0	0
Row 164 Mass	540.076	888.04
Row 164 RT	0.719	3.178
Row 164 Names
Presence in List?	0	0
Row 165 Mass	192.96	888.886	888.887	1004.88	1120.87
Row 165 RT	0.65	2.829	2.919	3.041	5.317
Row 165 Names
Presence in List?	0	0	0	0	0
Row 166 Mass	772.919	888.907	1004.89	1120.88	1236.87
Row 166 RT	3.28	3.377	3.46	3.555	3.668
Row 166 Names
Presence in List?	0	0	0	0	0
Row 167 Mass	1004.93	1120.92
Row 167 RT	3.751	3.954
Row 167 Names
Presence in List?	0	0
Row 168 Mass	540.991	656.976	1352.91
Row 168 RT	3.339	3.694	3.687
Row 168 Names
Presence in List?	0	0	0
Row 169 Mass	1004.96	888.968	888.968	888.969
Row 169 RT	3.153	3.497	4.506	5.54
Row 169 Names
Presence in List?	0	0	0	0
Row 170 Mass	193.051	1352.93
Row 170 RT	1.997	3.37
Row 170 Names
Presence in List?	0	0
Row 171 Mass	657.066	425.092
Row 171 RT	3.335	3.945
Row 171 Names
Presence in List?	0	0
Row 172 Mass	1005.82	1237.8
Row 172 RT	4.825	7.571
Row 172 Names
Presence in List?	0	0
Row 173 Mass	194.061	889.992	1237.96
Row 173 RT	2.336	3.054	4.192
Row 173 Names
Presence in List?	0	0	0
Row 174 Mass	542.959	658.945
Row 174 RT	3.037	3.236
Row 174 Names
Presence in List?	0	0
Row 175 Mass	542.973	1238.9
Row 175 RT	3.326	3.528
Row 175 Names
Presence in List?	0	0
Row 176 Mass	195.045	658.995	774.984
Row 176 RT	2.721	3.73	3.764
Row 176 Names			94158-67-5
Presence in List?	0	0	1
Row 177 Mass	195.066	1238.96	195.066
Row 177 RT	0.736	5.303	1.427
Row 177 Names
Presence in List?	0	0	0
Row 178 Mass	1122.99	1354.97	659.036
Row 178 RT	2.953	3.984	0.686
Row 178 Names
Presence in List?	0	0	0
Row 179 Mass	1007.9	1123.89	1239.88
Row 179 RT	3.511	5.74	10.512
Row 179 Names
Presence in List?	0	0	0
Row 180 Mass	892.775	1124.75
Row 180 RT	4.127	4.243
Row 180 Names
Presence in List?	0	0
Row 181 Mass	196.984	660.935	312.973	312.971
Row 181 RT	2.159	2.445	2.47	3.357
Row 181 Names	375-02-0	65294-16-8	307-24-4	307-24-4
Presence in List?	1	1	1	1
Row 182 Mass	1008.94	892.944
Row 182 RT	3.049	3.974
Row 182 Names		93857-42-2
Presence in List?	0	1
Row 183 Mass	429.914	893.87
Row 183 RT	3.769	8.973
Row 183 Names
Presence in List?	0	0
Row 184 Mass	1357.95	430.038
Row 184 RT	3.676	4.916
Row 184 Names
Presence in List?	0	0
Row 185 Mass	198.908	546.875
Row 185 RT	0.654	3.835
Row 185 Names
Presence in List?	0	0
Row 186 Mass	546.95	1010.9	778.928	894.917
Row 186 RT	3.136	3.53	3.363	3.446
Row 186 Names
Presence in List?	0	0	0	0
Row 187 Mass	430.974	546.961	662.95	430.974
Row 187 RT	2.829	3.282	3.353	3.052
Row 187 Names	152914-73-3	317817-24-6 63967-42-0	16486-96-7 72629-94-8 217824-95-8	152914-73-3
Presence in List?	1	2	3	1
Row 188 Mass	1126.92	1242.91
Row 188 RT	3.281	3.283
Row 188 Names
Presence in List?	0	0
Row 189 Mass	1242.94	1358.93
Row 189 RT	3.713	4.147
Row 189 Names
Presence in List?	0	0
Row 190 Mass	548.927	432.938	548.926
Row 190 RT	2.892	3.326	3.046
Row 190 Names	68259-12-1		68259-12-1
Presence in List?	1	0	1
Row 191 Mass	780.922	896.909
Row 191 RT	3.525	3.578
Row 191 Names
Presence in List?	0	0
Row 192 Mass	780.95	1012.93
Row 192 RT	3.649	4.003
Row 192 Names		68310-12-3
Presence in List?	0	1
Row 193 Mass	896.952	1128.93	1360.9
Row 193 RT	3.336	3.517	3.719
Row 193 Names
Presence in List?	0	0	0
Row 194 Mass	548.997	433.006
Row 194 RT	3.072	5.506
Row 194 Names	36390-05-3
Presence in List?	1	0
Row 195 Mass	1013	317.075
Row 195 RT	4.547	6.113
Row 195 Names
Presence in List?	0	0
Row 196 Mass	1013.94	1245.92
Row 196 RT	3.419	3.588
Row 196 Names
Presence in List?	0	0
Row 197 Mass	1129.95	897.978
Row 197 RT	3.179	3.486
Row 197 Names
Presence in List?	0	0
Row 198 Mass	782.974	1362.92
Row 198 RT	3.967	4.424
Row 198 Names
Presence in List?	0	0
Row 199 Mass	1015.02	1247	1246.99
Row 199 RT	3.996	6.309	3.797
Row 199 Names
Presence in List?	0	0	0
Row 200 Mass	784.918	436.949	900.907	1016.9
Row 200 RT	2.806	3.166	2.936	3.043
Row 200 Names			40143-79-1
Presence in List?	0	0	1	0
Row 201 Mass	668.957	1248.9
Row 201 RT	3.423	3.279
Row 201 Names	423-66-5
Presence in List?	1	0
Row 202 Mass	1016.93	1248.91	1132.92	1248.91	1364.9
Row 202 RT	3.509	3.721	3.584	3.993	4.218
Row 202 Names
Presence in List?	0	0	0	0	0
Row 203 Mass	784.999	669.01	785
Row 203 RT	4.823	0.763	3.542
Row 203 Names
Presence in List?	0	0	0
Row 204 Mass	321.888	1017.82	1017.82
Row 204 RT	3.628	4.268	4.733
Row 204 Names
Presence in List?	0	0	0
Row 205 Mass	322.917	1134.83
Row 205 RT	0.63	7.453
Row 205 Names	99324-96-6 1513-88-8 59665-23-5
Presence in List?	3	0
Row 206 Mass	206.975	90.9855	90.9853	1134.88
Row 206 RT	0.668	5.32	6.114	5.504
Row 206 Names
Presence in List?	0	0	0	0
Row 207 Mass	786.934	1018.91	1134.9	1250.89	1366.87	902.923
Row 207 RT	3.2	3.387	3.463	3.552	3.659	3.305
Row 207 Names
Presence in List?	0	0	0	0	0	0
Row 208 Mass	670.98	786.969
Row 208 RT	3.299	3.35
Row 208 Names
Presence in List?	0	0
Row 209 Mass	786.981	1366.92
Row 209 RT	3.7	4.518
Row 209 Names
Presence in List?	0	0
Row 210 Mass	207.067	1250.96	439.043
Row 210 RT	1.875	5.322	5.79
Row 210 Names
Presence in List?	0	0	0
Row 211 Mass	555.952	1135.9
Row 211 RT	3.091	5.716
Row 211 Names	2806-24-8
Presence in List?	1	0
Row 212 Mass	671.989	1135.95
Row 212 RT	3.55	5.545
Row 212 Names
Presence in List?	0	0
Row 213 Mass	208.076	440.057	440.056
Row 213 RT	2.552	4.231	4.477
Row 213 Names
Presence in List?	0	0	0
Row 214 Mass	440.862	1136.79
Row 214 RT	0.644	8.46
Row 214 Names
Presence in List?	0	0
Row 215 Mass	904.938	1252.9	1136.91
Row 215 RT	3.647	4.236	4.001
Row 215 Names			1127427-64-8
Presence in List?	0	0	1
Row 216 Mass	440.997	556.982	672.966
Row 216 RT	3.145	3.509	3.334
Row 216 Names	3108-24-5 812-70-4		94158-70-0
Presence in List?	2	0	1
Row 217 Mass	788.975	904.963	788.974	788.975	788.975
Row 217 RT	3.381	3.434	6.599	4.172	4.976
Row 217 Names	57677-95-9		57677-95-9	57677-95-9 57677-95-9 57677-95-9	57677-95-9
Presence in List?	1	0	1	3	1
Row 218 Mass	209.061	441.04
Row 218 RT	2.887	2.948
Row 218 Names		267648-90-8
Presence in List?	0	1
Row 219 Mass	1021.81	1253.79
Row 219 RT	4.932	8.941
Row 219 Names
Presence in List?	0	0
Row 220 Mass	674.95	442.972	442.972
Row 220 RT	3.407	3.832	3.379
Row 220 Names	39187-47-8	55009-88-6 57678-01-0 220369-95-9	55009-88-6 57678-01-0 220369-95-9
Presence in List?	1	3	3
Row 221 Mass	1254.96	1370.94
Row 221 RT	5.083	4.924
Row 221 Names
Presence in List?	0	0
Row 222 Mass	211.076	1138.99
Row 222 RT	3.277	3.677
Row 222 Names
Presence in List?	0	0
Row 223 Mass	327.866	1139.79
Row 223 RT	3.47	8.751
Row 223 Names
Presence in List?	0	0
Row 224 Mass	907.952	1139.93
Row 224 RT	0.674	5.741
Row 224 Names
Presence in List?	0	0
Row 225 Mass	1371.97	1140
Row 225 RT	4.031	4.964
Row 225 Names
Presence in List?	0	0
Row 226 Mass	328.866	1140.79
Row 226 RT	0.637	6.086
Row 226 Names
Presence in List?	0	0
Row 227 Mass	212.979	792.926
Row 227 RT	1.686	3.331
Row 227 Names	375-22-4 335-10-4
Presence in List?	2	0
Row 228 Mass	908.943	792.951
Row 228 RT	2.843	3.725
Row 228 Names		94200-57-4
Presence in List?	0	1
Row 229 Mass	213.033	792.979	1256.93
Row 229 RT	3.044	3.138	4.026
Row 229 Names
Presence in List?	0	0	0
Row 230 Mass	910.908	1026.9
Row 230 RT	3.464	3.554
Row 230 Names
Presence in List?	0	0
Row 231 Mass	330.98	562.957	1374.87	562.958	446.968	794.928
Row 231 RT	2.527	3.191	3.352	3.05	3.1	3.379
Row 231 Names	75180-14-2 648-39-5	2058-94-8 16486-94-5		2058-94-8 16486-94-5
Presence in List?	2	2	0	2	0	0
Row 232 Mass	1026.93	794.948	1258.9	1026.93
Row 232 RT	3.096	3.55	9.755	4.077
Row 232 Names
Presence in List?	0	0	0	0
Row 233 Mass	1142.95	1374.92
Row 233 RT	3.543	3.927
Row 233 Names
Presence in List?	0	0
Row 234 Mass	1143.87	1259.86
Row 234 RT	5.028	8.467
Row 234 Names
Presence in List?	0	0
Row 235 Mass	216.082	1143.99
Row 235 RT	3.331	5.743
Row 235 Names
Presence in List?	0	0
Row 236 Mass	448.933	564.922
Row 236 RT	2.844	3.059
Row 236 Names	375-92-8 118334-96-6
Presence in List?	2	0
Row 237 Mass	796.913	448.944	912.902	796.91
Row 237 RT	3.51	14.395	3.603	3.87
Row 237 Names
Presence in List?	0	0	0	0
Row 238 Mass	216.99	680.943
Row 238 RT	2.831	3.278
Row 238 Names
Presence in List?	0	0
Row 239 Mass	680.955	912.934
Row 239 RT	3.476	3.743
Row 239 Names		16517-11-6
Presence in List?	0	1
Row 240 Mass	1028.94	1376.9	1144.93
Row 240 RT	3.433	3.742	3.913
Row 240 Names
Presence in List?	0	0	0
Row 241 Mass	912.983	1028.97	1260.95	1376.94
Row 241 RT	3.525	3.576	3.905	4.125
Row 241 Names
Presence in List?	0	0	0	0
Row 242 Mass	450.926	798.892	1262.85
Row 242 RT	3.122	3.497	8.491
Row 242 Names	335-71-7
Presence in List?	1	0	0
Row 243 Mass	334.971	218.986
Row 243 RT	0.661	2.163
Row 243 Names	54326-26-0 16500-37-1 17480-16-9	375-17-7
Presence in List?	3	1
Row 244 Mass	219.027	1378.92
Row 244 RT	0.737	4.496
Row 244 Names
Presence in List?	0	0
Row 245 Mass	219.066	1262.96
Row 245 RT	2.036	5.491
Row 245 Names
Presence in List?	0	0
Row 246 Mass	103.921	1031.83	1031.83
Row 246 RT	0.631	4.727	4.835
Row 246 Names
Presence in List?	0	0	0
Row 247 Mass	683.907	1031.87	1031.87
Row 247 RT	3.216	5.51	6.304
Row 247 Names
Presence in List?	0	0	0
Row 248 Mass	684.925	800.913	916.902
Row 248 RT	2.641	2.833	2.967
Row 248 Names		610800-34-5
Presence in List?	0	1	0
Row 249 Mass	336.989	568.964
Row 249 RT	3.142	3.282
Row 249 Names
Presence in List?	0	0
Row 250 Mass	221.012	916.939
Row 250 RT	2.589	3.425
Row 250 Names
Presence in List?	0	0
Row 251 Mass	685.04	1380.97
Row 251 RT	4.145	4.969
Row 251 Names
Presence in List?	0	0
Row 252 Mass	222.952	570.918
Row 252 RT	0.674	3.088
Row 252 Names
Presence in List?	0	0
Row 253 Mass	918.917	1150.89	1266.88	1382.87	1034.91
Row 253 RT	3.324	3.488	3.572	3.687	3.406
Row 253 Names
Presence in List?	0	0	0	0	0
Row 254 Mass	918.94	107.017	107.017
Row 254 RT	3.873	3.947	5.319
Row 254 Names
Presence in List?	0	0	0
Row 255 Mass	802.976	223.029	223.029	1266.93	223.029	223.028	223.029	223.029
Row 255 RT	3.562	3.688	3.947	4.173	4.289	4.723	5.318	3.503
Row 255 Names
Presence in List?	0	0	0	0	0	0	0	0
Row 256 Mass	224.002	571.966
Row 256 RT	1.445	3.373
Row 256 Names
Presence in List?	0	0
Row 257 Mass	1383.96	1267.98
Row 257 RT	2.992	5.734
Row 257 Names
Presence in List?	0	0
Row 258 Mass	1268.81	1152.82	1152.82
Row 258 RT	3.426	11.56	12.029
Row 258 Names
Presence in List?	0	0	0
Row 259 Mass	688.949	1384.88	456.968
Row 259 RT	2.582	3.369	4.251
Row 259 Names	32687-76-6		147874-76-8 70887-84-2
Presence in List?	1	0	2
Row 260 Mass	1152.91	1384.89
Row 260 RT	4.058	4.616
Row 260 Names
Presence in List?	0	0
Row 261 Mass	1036.95	688.98	688.98	688.981	688.981
Row 261 RT	4.764	5.113	3.269	3.923	4.205
Row 261 Names
Presence in List?	0	0	0	0	0
Row 262 Mass	689.017	1152.97	1268.96
Row 262 RT	3.636	3.704	3.881
Row 262 Names
Presence in List?	0	0	0
Row 263 Mass	342.088	922.032	1038.02
Row 263 RT	1.481	4.006	4.489
Row 263 Names
Presence in List?	0	0	0
Row 264 Mass	690.932	1038.9	1154.88	1270.87	806.921	922.909
Row 264 RT	3.184	3.476	3.565	3.687	3.305	3.388
Row 264 Names
Presence in List?	0	0	0	0	0	0
Row 265 Mass	574.957	458.966	806.927
Row 265 RT	3.257	3.924	3.447
Row 265 Names	330562-42-0
Presence in List?	1	0	0
Row 266 Mass	574.996	1386.92
Row 266 RT	3.369	3.964
Row 266 Names	38565-54-7
Presence in List?	1	0
Row 267 Mass	691.001	1038.96	1154.95
Row 267 RT	3.783	7.846	3.308
Row 267 Names	1946796-71-9
Presence in List?	1	0	0
Row 268 Mass	1155.89	1271.87
Row 268 RT	4.745	8.456
Row 268 Names
Presence in List?	0	0
Row 269 Mass	923.92	1271.88
Row 269 RT	0.669	3.476
Row 269 Names
Presence in List?	0	0
Row 270 Mass	1156.87	460.933
Row 270 RT	0.67	2.827
Row 270 Names		646-83-3 1135682-88-0
Presence in List?	0	2
Row 271 Mass	808.986	924.973
Row 271 RT	4.172	4.246
Row 271 Names		54009-79-9 96497-21-1
Presence in List?	0	2
Row 272 Mass	229.92	1273.82
Row 272 RT	0.656	3.366
Row 272 Names
Presence in List?	0	0
Row 273 Mass	346.977	462.964
Row 273 RT	2.847	2.988
Row 273 Names	2342-07-6 63967-41-9 73928-40-2	375-95-1 15899-31-7
Presence in List?	3	2
Row 274 Mass	926.933	694.957	926.933	926.935
Row 274 RT	2.856	3.224	2.987	3.792
Row 274 Names
Presence in List?	0	0	0	0
Row 275 Mass	115.076	347.049
Row 275 RT	1.972	3.988
Row 275 Names
Presence in List?	0	0
Row 276 Mass	1043.83	927.837
Row 276 RT	4.848	10.278
Row 276 Names
Presence in List?	0	0
Row 277 Mass	231.944	1043.87	1043.87
Row 277 RT	0.678	5.514	5.734
Row 277 Names
Presence in List?	0	0	0
